# Supplementary material
Source: PubMed Central journal article supplement (PMC5137758)
Supplement: pnas.1610544113.sapp.pdf [file pnas.1610544113.sapp.pdf]

## Supporting Information Appendix

### **Tethered IL-15 augments antitumor activity and promotes a stem-cell memory subset in tumor-specific T cells**

Lenka V. Hurton<sup>1,2</sup>, Harjeet Singh<sup>1</sup>, Amer Najjar<sup>3</sup>, Kirsten Switzer<sup>1</sup>, Tiejuan Mi<sup>1</sup>, Sourindra Maiti<sup>1</sup>, Simon Olivares<sup>1</sup>, Brian Rabinovich<sup>1</sup>, Helen Huls<sup>1,4</sup>, Marie-Andrée Forget<sup>1,5</sup>, Vrushali Datar<sup>3</sup>, Partow Kebriaei<sup>6</sup>, Dean A. Lee<sup>1</sup>, Richard E. Champlin<sup>6</sup>, Laurence J.N. Cooper<sup>1,7</sup>

<sup>1</sup>Division of Pediatrics, The University of Texas MD Anderson Cancer Center, 1515 Holcombe Blvd., Houston, Texas, 77030, USA

<sup>2</sup>The University of Texas Graduate School of Biomedical Sciences, 6767 Bertner Ave., Houston, Texas, 77030, USA

<sup>3</sup>Cancer Systems Imaging, The University of Texas MD Anderson Cancer Center, 1515 Holcombe Blvd., Houston, Texas, 77030, USA

<sup>4</sup>Intrexon, 20358 Seneca Meadows Pkwy, Germantown, Maryland, 20876, USA

<sup>5</sup>Melanoma Medical Oncology, The University of Texas MD Anderson Cancer Center, 1515 Holcombe Blvd., Houston, Texas, 77030, USA

<sup>6</sup>Stem Cell Transplantation and Cellular Therapy, The University of Texas MD Anderson Cancer Center, 1515 Holcombe Blvd., Houston, Texas, 77030, USA

<sup>7</sup>ZIOPHARM Oncology, Inc., One First Ave., Parris Building 34, Navy Yard Plaza, Boston, Massachusetts, 02129, USA

## SI Appendix Materials and Methods

**Plasmid Design. mbIL15:** Alternate codon usage and signal peptides can increase expression of IL-15. Therefore, signal peptides for IL-15 and IL-15R $\alpha$  were omitted and the IgE signal peptide (gb|AAB59424.1) was used for the mbIL15 fusion protein. The mbIL15 construct fuses the human codon-optimized (hCoOp) GeneArt (Regensburg, Germany) IL-15 cDNA sequence (NM\_000585.4) to the full-length IL-15R $\alpha$  cDNA sequence (NM\_002189.3) via a 26 amino acid glycine-serine linker [SG<sub>3</sub>(SG<sub>4</sub>)<sub>3</sub>SG<sub>3</sub>SLQ] and has a C-terminal (FLAG)<sub>3</sub> epitope tag (DYKDDDDK, repeated three times). The DNA plasmid expressing IL15-IL15Ra-FLAG\_pMK-RQ was synthesized by GeneArt. IL15-IL15Ra-FLAG\_pMK-RQ and GlySer-EGFP-mIgG1/pSBSO were digested with *NheI* and *XhoI* to liberate the mbIL15 insert and pSBSO Sleeping Beauty (SB) vector backbone, respectively, to generate IL15-IL15R $\alpha$ -Flag/pSBSO. Alternatively, a clinically relevant design of mbIL15 (mIL15-IL15Ra(hCoOp)/pSBSO-FRA) was used in the established leukemia mouse model along with the \*CAR. The clinical mbIL15 insert consisted of all of the same components as the original mbIL15 but for the removal of the FLAG tag. The clinical mbIL15 insert was codon-optimized and synthesized by GeneArt. Vector 13ABPHSP mIL15-IL15Ra/pMK-T and clinical vector CD19R-CD28Tm-41BBCyt-Z(hCoOp)/pSBSO-FRA were digested with *NheI* and *XhoI* to liberate the mbIL15 insert and pSBSO SB vector backbone, respectively to generate the clinical mIL15-IL15Ra(hCoOp)/pSBSO-FRA plasmid.

**SB11:** The hyperactive transposase (SB11) is under the control of a cytomegalovirus (CMV) promoter in the pKan-CMV-SB11 SB plasmid (1, 2).

CARs: Generation of the SB transposon encoding the second generation CD19-specific CAR (CD19RCD28/pSBSO) under control of the human elongation factor-1 $\alpha$  promoter has been described (1, 2) and is herein referred to as ‘CAR’.

A CD19-specific CAR co-expressing *ffLuc*, designated CAR-*ffLuc*, (CD19RCD28-T2A-Flag-*ffLuc*/pT2SBSO) was used for *in vivo* monitoring of T cells by bioluminescent imaging (BLI). The hCoOp CAR and firefly (*Photinus pyralis*) luciferase reporter genes, linked via a self-cleaving 2A peptide from the *Thosea asigna* virus, were derived from the previously made plasmid CD19RCD28mz-T2A-h $\Delta$ TK(CoOp)/p $\Delta$ SBSO. The SB inverted-direct repeats (IRs/DRs) T1 were replaced with the hyperactive IRs-DRs T2, to improve transposition, and the firefly luciferase reporter gene replaced the h $\Delta$ TK transgene. Plasmids CD19RCD28mz-T2A-h $\Delta$ TK(CoOp)/p $\Delta$ SBSO and CD19RCD28mZ(CoOp)/pT2SBSO were digested with *Stu* I-*Kpn* I and *Cla*I-*Kpn*I restriction enzymes, respectively, with an extra blunting reaction after the *Cla*I digestion, and ligated using T4 DNA ligase to create intermediate plasmid-I, CD19RCD28mz-T2A-h $\Delta$ TK(CoOp)/pT2SBSO. The T2A-h $\Delta$ TK transgene was replaced with a T2A-flag-tag fusion and a multiple cloning site (MCS). T2A-flag-MCS was created by PCR primer annealing and TOPO-TA cloning. Plasmids CD19RCD28mz-T2A-h $\Delta$ TK(CoOp)/pT2SBSO and T2A-Flag-MCS/TOPO were digested with *Bsp*E1 and *Spe*I and ligated to create intermediate plasmid-II, CD19RCD28mz-T2A-Flag(CoOp)/pT2SBSO. The firefly luciferase gene was excised from the previously made plasmid Flag-FFLuc-HyTK(CoOp)/pT2SBSO using *Sna*BI and *Eco*RV restriction enzymes. The same restriction enzymes were used to digest the accepting pT2SBSO vector. Purified fragments were ligated to create the CD19RCD28mz-T2A-Flag-FFLuc(CoOp)/pT2SBSO.

The *SB* transposon encoding \*CAR (CD19R-Fcm-CD28m-Z(hCoOp)/pSBSO-SIM), a second generation CD19-specific IgG<sub>4</sub>-Fc stalk modified CAR, was generated to abrogate unintended binding to innate Fcγ receptors. Source DNA was human codon-optimized and synthesized by GeneArt. The same CD19-specific scFv as used in our previous vectors (2) was connected to modified human IgG<sub>4</sub> hinge and Fc regions (the hinge was previously mutated from amino acids CPSC and CPPC to enhance stability of the dimerized IgG<sub>4</sub> heavy chain, and amino acid changes L235E, and N297Q were newly made to decrease unintended binding to innate Fcγ receptors). The Fc region was connected to the human CD28 transmembrane and cytoplasmic domains with the cytoplasmic endodomain modification RLLH to RGGH to improve CAR expression; and the CD28 endodomain was connected to the CD3-Z cytoplasmic domain. The GeneArt vector and vector CD19RCD28mZ(hCoOp)/pSBSO-SIM used in clinical trials were digested with *AvrII* and *XmnI* to obtain the insert and vector backbone, which included a portion of the CD19R-CAR. Ligation generated the final \*CAR vector (CD19R-Fcm-CD28m-Z(hCoOp)/pSBSO-SIM).

*rLuc*-mKate reporter: *rLuc*8.6-535-T2A-mKateS158A/pLV430G is a lentiviral vector encoding both *Renilla luciferase* (*rLuc*) and mKate. They were created from sequences for *rLuc*8.6-535 and mKateS158A as reported (3, 4), codon-optimized as previously reported (5), and were synthesized by GeneArt to yield a B1 *rLuc*8.6-535-T2A-mKateS158A B2 construct. The B1 and B2 sites are lambda phage recombination sites used in Gateway Recombination Cloning Technology (Invitrogen) synthesizing the construct via BP reaction into pDONR221. Subsequently, *rLuc*8.6-535-T2A-mKateS158A/pDONR221 was recombined into pLV430G (6), a self-inactivating lentivirus encoding an internal U3 promoter from the murine stem cell virus.

**Cell lines and propagation.** Cell lines were maintained in complete media [CM; RPMI 1640, 10% heat-inactivated fetal bovine serum (Hyclone), and 1% Glutamax-100 (Gibco)] in humidified conditions at 5% CO<sub>2</sub> and 37°C. NALM-6 (pre-B cell) and THP-1 (human monocyte) were obtained from American Type Culture Collection (Manassas, VA). K562-derived AaPC (designated “clone 9”) (7), CD19<sup>+</sup>EL4 (2), and GFP<sup>+</sup>*effLuc*<sup>+</sup>NALM-6 (8) have been described. The *rLuc*<sup>+</sup>mKate<sup>+</sup>NALM-6 cells were generated by lentiviral transduction of NALM-6 with *rLuc*8.6-535-T2A-mKateS158A/pLV430G using standard techniques. Cell lines were negative for mycoplasma. Identity of cell lines was confirmed by STR DNA fingerprinting by the Characterized Cell Line Core, a Cancer Center Support Grant supported facility, at MD Anderson.

**Generation and *ex vivo* expansion of genetically modified T cells.** The CAR and mbIL15-CAR T cells were generated from mononuclear cell buffy coats from anonymized healthy donors (Gulf Coast Regional Blood Center, Houston, TX) but with modifications to the previously described method of generating clinical-grade CD19-specific CAR T cells (**SI Appendix, Fig. S1**) (2). Briefly, PBMC were co-electroporated with supercoiled DNA plasmids coding for mbIL15 and second-generation CAR separately expressed as two *Sleeping Beauty* (SB) transposons along with supercoiled DNA plasmid coding for SB11 transposase. Cells were then cocultured on  $\gamma$ -irradiated K562 (clone #9)-derived activating and propagating cells (AaPC), modified to co-express truncated CD19, CD64, CD86, and CD137L, and supplemented with recombinant soluble IL-21 (30 ng/mL). The genetic modification and expansion of CAR T cells (not expressing mbIL15) was similarly performed on AaPC clone #9, but electroporated with only DNA plasmid coding for CAR as SB transposon and DNA plasmid coding for the SB transposase with subsequent cultures supplemented with recombinant soluble IL-21 (30 ng/mL) and IL-2 (50 U/mL) or soluble IL-

15/IL-15R $\alpha$ -Fc complex (5 ng/mL, IL-15 complex). The AaPC were added once every 8 – 10 days at ratio of 1:1 (T cells to AaPC) and cytokine(s) were supplemented three times per week for all cultures. IL-15/IL15-R $\alpha$ -Fc (referred to as ‘IL-15 complex’) was supplemented in CAR T-cell culture medium or used as a control in certain assays. IL-15/IL15-R $\alpha$ -Fc complex is a 2:1 molar ratio combination of human IL-15 (PeproTech) and human IL-15R $\alpha$ -Fc chimera (R&D Systems) containing 5 ng/mL of IL-15 (dosing of complex is based on IL-15 content). If CD3<sup>neg</sup>CD56<sup>+</sup> NK cell outgrowth exceeded 15%, these were depleted using CD56 microbeads (Miltenyi Biotec) and LS columns (Miltenyi Biotec) per the manufacturer’s instructions. Viable T cells were enumerated after each stimulation cycle (8–10 days) based on Trypan blue exclusion. Inferred CAR T cell numbers were calculated by multiplying the CD3<sup>+</sup>CAR cell fold expansion from the first stimulation with the starting cell number that would then be multiplied by the CAR-specific T cell expansion from subsequent stimulation cycles.

**Western Blot of mbIL15.** Whole cell lysates (2.4  $\mu$ g) of propagated mbIL15-CAR T cells were separated by SDS-PAGE under reducing conditions using a “Simple Western” size-based assay (Wes<sup>TM</sup> System, ProteinSimple, Santa Clara, CA) per the company’s protocol. The target protein (mbIL15) was identified using anti-human IL-15 antibody (20 $\mu$ g/mL, R&D Systems) followed by HRP-conjugated rabbit anti-goat secondary antibody (1:250).

**Antibodies and Flow Cytometry.** Up to 10<sup>6</sup> cells were stained with fluorochrome-conjugated antibodies: fluorescein isothiocyanate (FITC), phycoerythrin (PE), peridinin chlorophyll protein conjugated to cyanine dye (PerCP-Cy5.5), allophycocyanin (APC), AlexaFluor-488, and AlexaFluor-647, which unless otherwise stated, were obtained from BD Biosciences. Unless

otherwise stated, antibodies were used at 1:20, 1:40, 1:25, 1:33, 1:20, and 1:20 dilutions, respectively, in a 100  $\mu$ l volume of buffer. Staining for cell surface markers and corresponding isotype controls was conducted in flow cytometry buffer (phosphate-buffered saline (PBS), 2% fetal bovine serum (FBS), 0.1% sodium azide) for 30 minutes at 4°C. Intracellular staining was performed following fixation and permeabilization for 20 minutes at 4°C with BD Cytotfix/Cytoperm with antibodies diluted in 1 $\times$  Perm/Wash buffer for 30 minutes at 4 °C (BD Biosciences). Annexin V staining was conducted in 1 $\times$  annexin binding buffer (BD biosciences). Antibodies used for immunostaining included (against human): Bcl-2 (1:5 dilution, clone Bcl-2/100), Fc (to detect CAR; clone H10104, Invitrogen), IL-15 (1:6.7 dilution for APC; clone 34559, R&D Systems), Blimp-1 (clone 646702, R&D Systems), CD19 CAR idiotype (clone 136.20.1) (9), CD3 (clone SK7), CD4 (clone RPA-T4), CD8 (clone SK1), CD25 (clone M-A251), CD27 (clone L128), CD28 (clone L293), CD19 (clone HIB19), CD45RA (clone HI100), CD45RO (clone UCHL1), CD56 (clone B159), CD62L (clone DREG-56), CD122 (clone Mik- $\beta$ 3), CD127 (1:8.3 dilution; clone 40131, R&D Systems), CCR7 (1:45 dilution for PerCP-Cy5.5; clone G043H7, BioLegend), IL-2 (clone MQ1-17H12), IFN $\gamma$  (clone B27), pSTAT5 (pY694) [1:5 dilution; clone 47/Stat5(pY694)], T-bet (1:20 for PerCP-Cy5.5; clone 4B10, BioLegend), and unconjugated rabbit anti-TCF1 (1:20 dilution; clone C725.7, Thermo Scientific). Polyclonal goat anti-rabbit IgG-DyLight650 (1:100 dilution; Thermo Scientific) was used as a secondary antibody to detect TCF1. Annexin V (1:20 dilution; BD Bioscience) and anti-FLAG (1:200 dilution; Prozyme) were also used. Data were acquired using a FACSCalibur with Cell Quest version 3.3 software (BD Biosciences) and analyzed with FlowJo software (version 7.6.5, TreeStar).

**Phosflow of pSTAT5.** Cells were washed in PBS to remove residual cytokines from culture media. The cells were then transferred to fresh serum-free culture media (RPMI supplemented with 1% Glutamax) at a density of  $2 \times 10^6$ /mL and starved for 12 hours without serum and exogenous cytokine. Serum-starved negative control CAR T cells provided the baseline level of pSTAT5, and positive control CAR T cells were treated with 100 ng/mL IL-15 for one hour after “starving” prior to fixation. Cells were pelleted to remove the supernatant and processed according to the manufacturer’s protocol using PhosFlow Lyse/Fix Buffer (BD Biosciences), BD PhosFlow Perm Buffer III (BD Biosciences), and pSTAT5 (pY694, BD Biosciences).

**Intracellular cytokine production.** Production of cytokines was assessed by intracellular cytokine staining of T cells as described above. T cells were co-cultured with CD19<sup>+</sup> or CD19<sup>neg</sup> targets at an effector to target ratio of 1:5 in 200  $\mu$ L of CM. T cells were incubated alone (negative control) and with the addition of Leukocyte Activation Cocktail (LAC, containing PMA and ionomycin, BD Biosciences; positive control). Brefeldin-A (GolgiPlug, BD Biosciences) was added, per manufacturer instructions, to all cultures to block exocytosis of cytokines. Cultures were incubated for 6 hours at 37°C, then stained for surface markers, followed by fixation, permeabilization and staining for expression of intracellular proteins.

**Chromium release assay.** The antigen-specific cytolytic activity of T cells was assessed in a standard 4-hour chromium release assay (CRA), as previously described (10). Genetically modified T cells were incubated with  $2 \times 10^5$  of <sup>51</sup>Cr-labeled target cells (CD19<sup>neg</sup> parental EL4, CD19<sup>+</sup> EL4, or CD19<sup>+</sup> NALM-6). The percentage of specific lysis was calculated from the release of <sup>51</sup>Cr using a TopCount NXT (Perkin-Elmer) (10).



***In vitro* antigen and cytokine withdrawal assays.** After the fourth stimulation with AaPC, mbIL15<sup>±</sup>-CAR T cells were maintained with exogenous cytokine(s) for 10 days, then enumerated and transferred to fresh CM in exogenous cytokine-free (unless otherwise noted) and antigen-free culture conditions. CAR T cells supplemented with IL-15 complex (5 ng/mL, 2×/week) served as a positive control for an assay with cells enumerated on days 15, 30, 50, and 65. T cells persisting in culture for >65 days, referred to as “AWD-T cells”, were assessed for pSTAT5 and Bcl-2. Two days prior to staining for Bcl-2, baseline control CAR T cells were washed and resuspended in CM without cytokine supplementation.

The withdrawal assay assessing CCR7 subset T cell viability was performed as described above, but tested the following treatments: (i) mbIL15-CAR T cells, (ii) CAR T cells supplemented with IL-2 (50 U/ml, 2×/week), and (iii) CAR T cells supplemented with IL-15 (5 ng/ml, 2×/week). Live cell staining of AWD-T cell CCR7 subsets was performed on cells after 65 days. AWD-T cells were first stained with CCR7 antibody and gently washed once with FACS buffer, followed by staining with Annexin V (1:20 dilution; BD Bioscience) per the manufacturer’s protocol.

**nCounter system digital gene expression analysis.** Day 0 (i.e., 8 days after the fourth AaPC stimulation) CAR and mbIL15-CAR T cells and day 65 AWD-mbIL15-CAR T cells were frozen at -80°C and later analyzed in batch for gene expression analysis using the nCounter System (NanoString Technologies) according to the manufacturer’s protocol. At the time of analysis, RLT buffer (Qiagen) was added to the samples at a ratio of 166 µL of buffer per 10<sup>6</sup> cells prior to thawing. RNA lysates were immediately processed and analyzed using the nCounter Analysis System (NanoString Technologies) to detect the expression of genes of interest. Multiplexed

target-specific, color-coded reporter and biotinylated capture probes for mRNA species of interest were hybridized for >12 hours at 65°C in a thermocycler (Peltier Thermal Cycler, Bio-Rad), processed in the nCounter PrepStation (NanoString Technologies), and then analyzed using the nCounter Digital Analyzer (NanoString Technologies). Reference genes (*ACTB*, *G6PD*, *OAZ1*, *POLR1B*, *POLR2A*, *RPL27*, *RPS13*, and *TBP*), which together span a dynamic range of RNA expression, were included in the CodeSet and were used to normalize transcript levels to account for variation of transcript levels between samples and of the amount of total RNA present in samples. The count data was positive-, negative-, and housekeeping gene-normalized per nCounter guidelines using the nCounter RCC Collector Worksheet (v1.6.0, NanoString Technologies), as previously described (11), and filtered to remove low-expression genes: those with counts of less than 10 in greater than 60% of samples. A lymphocyte-specific CodeSet (**SI Appendix, Table S1**) was generated from RefSeq accession numbers for chosen mRNA transcripts that were used to generate the reporter and capture probe pairs constituting the lymphocyte gene panel. Statistical analyses were performed using edgeR software (12) via the RobiNA Java interface (13). Statistical evaluation of differential gene expression implemented statistical methods based on a negative binomial dispersion. Genes considered to be significantly differentially expressed demonstrated an absolute fold change  $\geq 2$ ,  $P < 0.01$ , and a FDR significance value of  $q < 0.05$  with the Benjamini-Hochberg method used for multiple testing correction. Significant differentially expressed genes were represented in a heatmap generated using Qlucore Omics Explorer (v.2.3, Qlucore). Digital gene expression analysis for assessing  $V\alpha/V\beta$  repertoire was performed as previously described (14).

**G-banded Karyotyping.** AWD-mIL15-CAR T cells that were in long-term continuous culture were restimulated with AaPC. Actively dividing T cell samples were submitted for G-banded karyotyping to the Texas Children's Hospital Clinical and Research Cytogenetic Laboratory.

**PKH Dilution Assay.** AWD-mIL15-CAR T cells that were in long-term continuous culture (1–2 years, depending on the donor) were labeled with PKH (Sigma) per manufacturer's instructions. Labeled cells were assessed for PKH dilution by flow cytometry 10 and 30 days after PKH labeling. The positive PKH dilution control was AWD-mIL15-CAR T cells stimulated with AaPC.

**Mouse experiments.** *In vivo* experiments used humanized NSG mice (NOD.Cg-Prkdc<sup>scid</sup>IL2r<sup>tm1Wjl</sup>/SzJ) that were purchased from The Jackson Laboratory (Bar Harbor, ME) or bred at The University of Texas MD Anderson Cancer Center.

**Bioluminescence imaging.** Serial BLI was performed to measure temporal biodistribution and abundance of mbIL15-CAR and CAR T cells co-expressing *ffLuc* as previously described (8, 15). Serial BLI was used to measure tumor burden of *ffLuc*<sup>+</sup> or *rLuc*<sup>+</sup>NALM-6 cells as previously described (15). Imaging was performed on anesthetized mice using a Xenogen IVIS 100 (Caliper Life Sciences). Imaging for T cells and tumor were performed on alternate days with an initial imaging of background BLI to check that no residual luminescence remained. T cell and tumor flux (photons/s/cm<sup>2</sup>/steradian) were quantified by measuring photon signal within a delineated region of interest (ROI) encompassing: (i) the body of the mouse, except the tail and (ii) over the femur. Living Image software (v2.50, Xenogen; Caliper Life Sciences) was used to process the BLI data.

Tissue preparation. Mice were euthanized, and peripheral blood, spleen, and BM from femur and tibia were harvested. Spleens were manually homogenized in 2% FBS/PBS and passed through a 40  $\mu\text{m}$  cell strainer (BD BioSciences). To obtain marrow, the femurs and tibia were flushed with 2% FBS/PBS using 30G needles (BD Biosciences). ACK lysing buffer (Gibco-Invitrogen) was used to lyse red blood cells in all samples.

In vivo persistence and characterization of genetically modified T cells in the absence of CAR activation. CAR T cells ( $2 \times 10^7$  per mouse) were injected i.v. into NSG mice in two cohorts (n = 5/group): (i) mbIL15-CAR-*ffLuc* T cells and (ii) CAR-*ffLuc* T cells. Serial bioluminescent imaging (BLI) measured T-cell persistence and biodistribution until sacrifice at days 48-50. Tissues were harvested for analysis.

In vivo characterization of mbIL15-CAR T cells persisting in the absence of CAR activation. NSG mice were engrafted with  $2 \times 10^7$  mbIL15-CAR T cells (n = 9). After 48-50 days, peripheral blood, spleen, and BM were harvested for flow cytometry analysis by for CD45RO and CCR7 expression. T cells from spleen, liver, and BM samples were *ex vivo* expanded on AaPC at an initial ratio of one isolated cell to five AaPC with subsequent weekly stimulations at a 1:1 ratio. Expanded T cells were tested for antigen-specific function by assessing intracellular staining of IFN $\gamma$  in response to CD19<sup>+</sup> versus CD19<sup>neg</sup> cell targets.

In vivo persistence and antitumor efficacy of CAR and mbIL15-CAR T Cells in a preventative leukemia model. T cells were engrafted prior to tumor to mimic MRD. On day 0, treatment cohorts of NSG mice (n = 5/group) were injected i.v. with  $2 \times 10^7$  genetically modified T cells: (i) mbIL15-CAR-*ffLuc* T cells, or (ii) CAR-*ffLuc* T cells (cultured with IL-15 and IL-21). On day 6,  $1 \times 10^4$  *rLuc*<sup>+</sup>NALM-6 were injected i.v. T cell and tumor BLI were monitored as described (6) until death

or sacrifice, when tissues were harvested for analysis of CD3 and CD19 by flow cytometry. For BLI, background fluorescence was defined by measuring animals given luciferin but without *ffLuc*-bearing cells (Fig. 5, T cell imaging). To assess therapeutic efficacy, a similar experiment was undertaken with survival at 98 days as the experimental endpoint in cohorts: (i) mbIL15-CAR-*ffLuc* T cells plus NALM-6 ( $n = 7$ ), (ii) CAR-*ffLuc* T cells plus NALM-6 ( $n = 8$ ), and (iii) NALM-6 only ( $n = 8$ ). T-cell persistence and biodistribution was measured by BLI until death or euthanasia. Mice were considered to have reached the experimental endpoint if they developed hind-limb paralysis or were otherwise moribund.

*In vivo* persistence and antitumor efficacy of CAR and mbIL15-CAR T Cells in an established leukemia model. On day 0, NSG mice were injected i.v. with  $1.5 \times 10^4$  *ffLuc*<sup>+</sup>eGFP<sup>+</sup>NALM-6. After 5 days of tumor engraftment, mice were imaged and randomized into treatment groups ( $n = 7$ , tumor only group;  $n = 6$ , all other T cell treatments). On day 6, mice were given  $1 \times 10^7$  genetically modified T cells via intra-cardiac injection. Infused T cells were CD19-specific CAR T cells (expressing CAR or \*CAR) with or without coexpression of mbIL15. The infused cell number was based on the CAR T cell number. Tumor BLI was measured until mortality or sacrifice, when tissues were harvested for analysis as above.

**Statistical analysis.** Statistical analyses were performed using Prism (GraphPad Software, v.6.02). Cell count and flux values were log-transformed for statistical analysis. Paired (*in vitro* data) and unpaired (*in vivo* data) t-tests were used to compare two groups. One-way ANOVA was used to compare three groups. Two-way ANOVA was used for multiple comparisons of two factors. Two-

way RM ANOVA (Tukey's post-test) compared multiple groups over time. Survival was analyzed with the log-rank test.

## SI Appendix References

1. Davies JK, *et al.* (2010) Combining CD19 redirection and alloanergization to generate tumor-specific human T cells for allogeneic cell therapy of B-cell malignancies. *Cancer Res* 70(10):3915-3924.
2. Singh H, *et al.* (2013) Manufacture of clinical-grade CD19-specific T cells stably expressing chimeric antigen receptor using Sleeping Beauty system and artificial antigen presenting cells. *PLoS One* 8(5):e64138.
3. Loening AM, Wu AM, & Gambhir SS (2007) Red-shifted Renilla reniformis luciferase variants for imaging in living subjects. *Nat Methods* 4(8):641-643.
4. Pletnev S, *et al.* (2008) A crystallographic study of bright far-red fluorescent protein mKate reveals pH-induced cis-trans isomerization of the chromophore. *J Biol Chem* 283(43):28980-28987.
5. Rabinovich BA, *et al.* (2008) Visualizing fewer than 10 mouse T cells with an enhanced firefly luciferase in immunocompetent mouse models of cancer. *Proc Natl Acad Sci U S A* 105(38):14342-14346.
6. Bai X, *et al.* (2011) Tracking long-term survival of intramyocardially delivered human adipose tissue-derived stem cells using bioluminescence imaging. *Mol Imaging Biol* 13(4):633-645.
7. Denman CJ, *et al.* (2012) Membrane-bound IL-21 promotes sustained ex vivo proliferation of human natural killer cells. *PLoS One* 7(1):e30264.
8. Singh H, *et al.* (2011) Reprogramming CD19-specific T cells with IL-21 signaling can improve adoptive immunotherapy of B-lineage malignancies. *Cancer Res* 71(10):3516-3527.
9. Jena B, *et al.* (2013) Chimeric antigen receptor (CAR)-specific monoclonal antibody to detect CD19-specific T cells in clinical trials. *PLoS One* 8(3):e57838.
10. Cooper LJ, *et al.* (2003) T-cell clones can be rendered specific for CD19: toward the selective augmentation of the graft-versus-B-lineage leukemia effect. *Blood* 101(4):1637-1644.
11. Maiti SN, *et al.* (2013) Sleeping beauty system to redirect T-cell specificity for human applications. *J Immunother* 36(2):112-123.
12. Robinson MD, McCarthy DJ, & Smyth GK (2010) edgeR: a Bioconductor package for differential expression analysis of digital gene expression data. *Bioinformatics* 26(1):139-140.
13. Lohse M, *et al.* (2012) RobiNA: a user-friendly, integrated software solution for RNA-Seq-based transcriptomics. *Nucleic Acids Res* 40(Web Server issue):W622-627.
14. Deniger DC, *et al.* (2013) Bispecific T-cells Expressing Polyclonal Repertoire of Endogenous gamma delta T-cell Receptors and Introduced CD19-specific Chimeric Antigen Receptor. *Molecular Therapy* 21(3):638-647.
15. Singh H, *et al.* (2007) Combining adoptive cellular and immunocytokine therapies to improve treatment of B-lineage malignancy. *Cancer Res* 67(6):2872-2880.

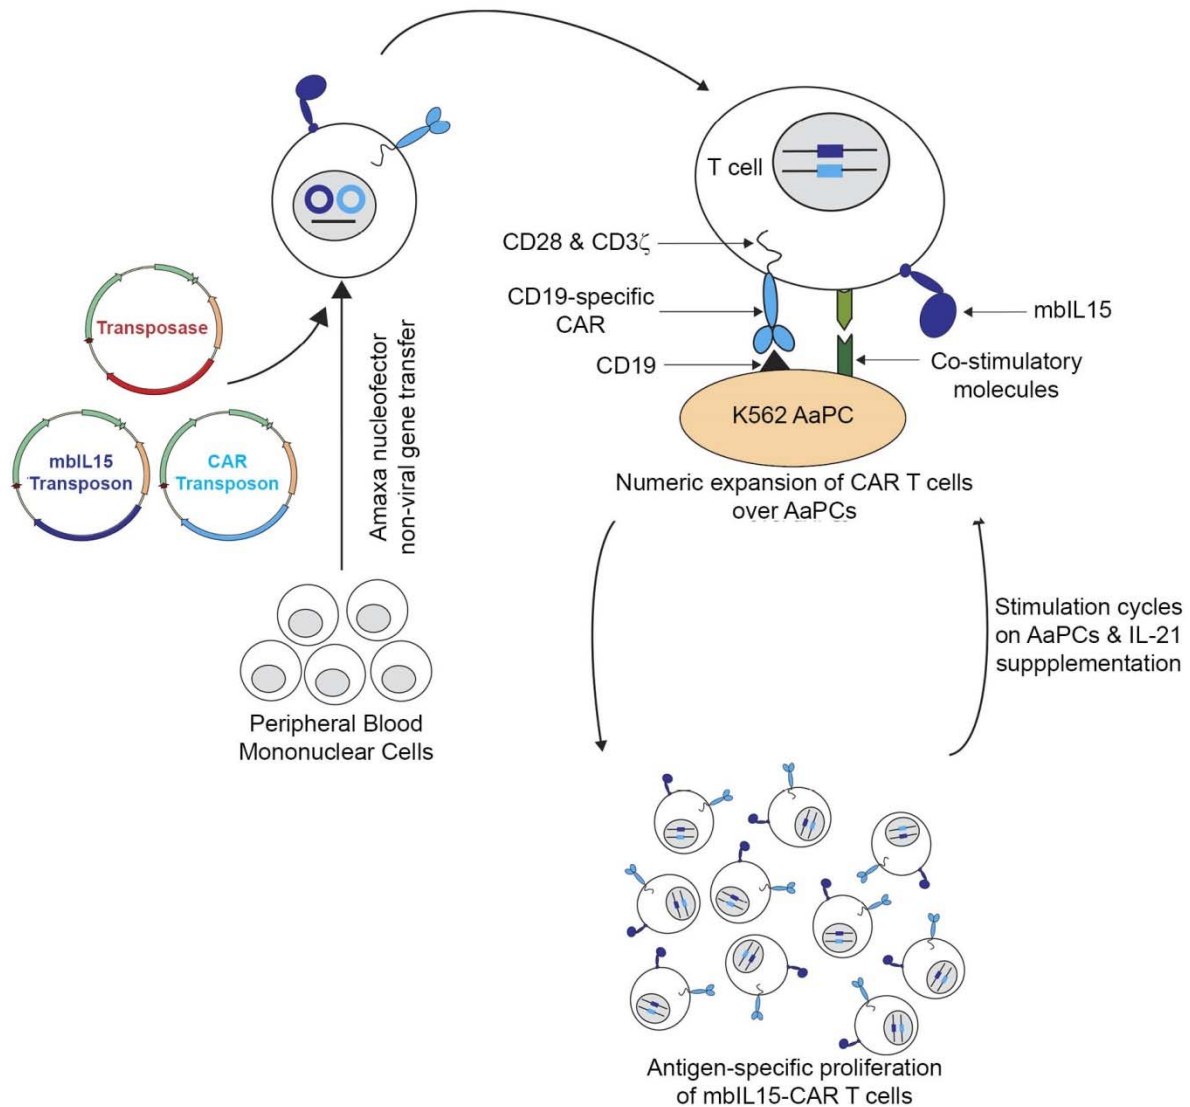

**Fig. S1. Generation of CAR<sup>+</sup>mbIL15<sup>±</sup> CD19-specific T cells using a clinical platform.**

Schematic of the clinically compliant methods (2) adopted and modified for generating and numerically expanding mbIL15-CAR T cells. PBMC were co-electroporated with mbIL15 and second-generation CAR separately expressed as two *Sleeping Beauty* (SB) transposons along with the SB11 transposase. Cells were then cocultured on  $\gamma$ -irradiated K562 (clone #9)-derived activating and propagating cells (AaPC), modified to co-express truncated CD19, CD64, CD86, and CD137L, and supplemented with IL-21 (30 ng/mL). The genetic modification and expansion of CAR T cells was similarly performed, but used only CAR SB transposon and SB transposase during electroporation with subsequent cultures supplemented with IL-21 (30 ng/mL) and IL-2 (50 U/mL) or soluble IL-15/IL-15R $\alpha$ -Fc complex (5 ng/mL, IL-15 complex).



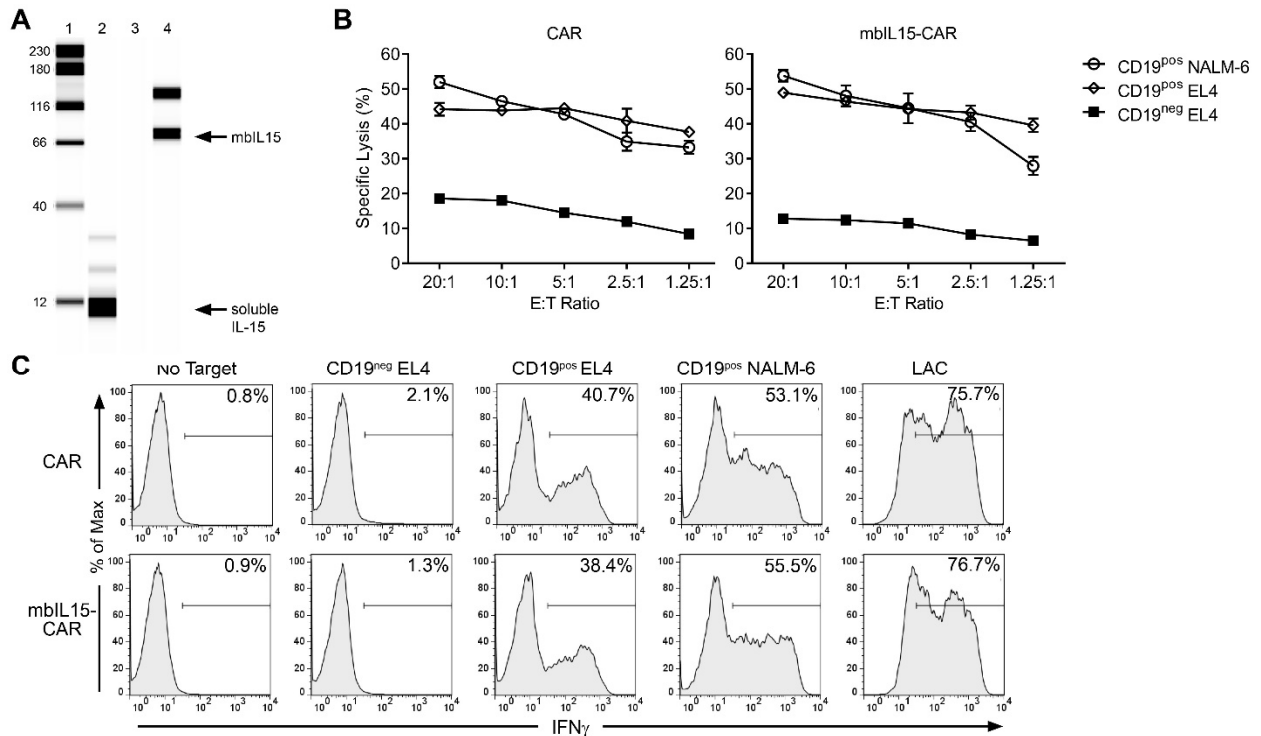

**Fig.S2. *In vitro* phenotype and effector function is not altered by mbIL15 expression. (A)** Western blot analysis of mbIL15 expressed by propagated human T cells. A representative blot from one of three donors is shown. Molecular weight marker (Lane 1), 0.1 ng recombinant human IL-15 positive control (Lane 2), CAR T-cell negative control (Lane 3), and mbIL15-CAR T cells (Lane 4). The predicted molecular weight of monomeric recombinant human IL-15 is 14 kDa and that of mIL15 is approximately 72 kDa (incorporating possible post-translational modifications). **(B)** CAR T cell (left panel) and mbIL15-CAR T cell (right panel) specific lysis rates of CD19<sup>+</sup> or CD19<sup>neg</sup> targets from a four-hour CRA. Data are represented as mean  $\pm$  SD for triplicate wells of one of three normal donors. **(C)** IFN $\gamma$  production by CAR and mbIL15-CAR T cells that were stimulated for 6 hours with CD19<sup>+</sup> (tCD19<sup>+</sup> EL4 and NALM-6) or CD19<sup>neg</sup> (EL4) targets, Leukocyte Activating Cocktail (LAC; positive control), or media alone (negative control). Histograms represent CD3<sup>+</sup>CAR<sup>+</sup> cells. Representative histograms are shown for one of four normal donors.

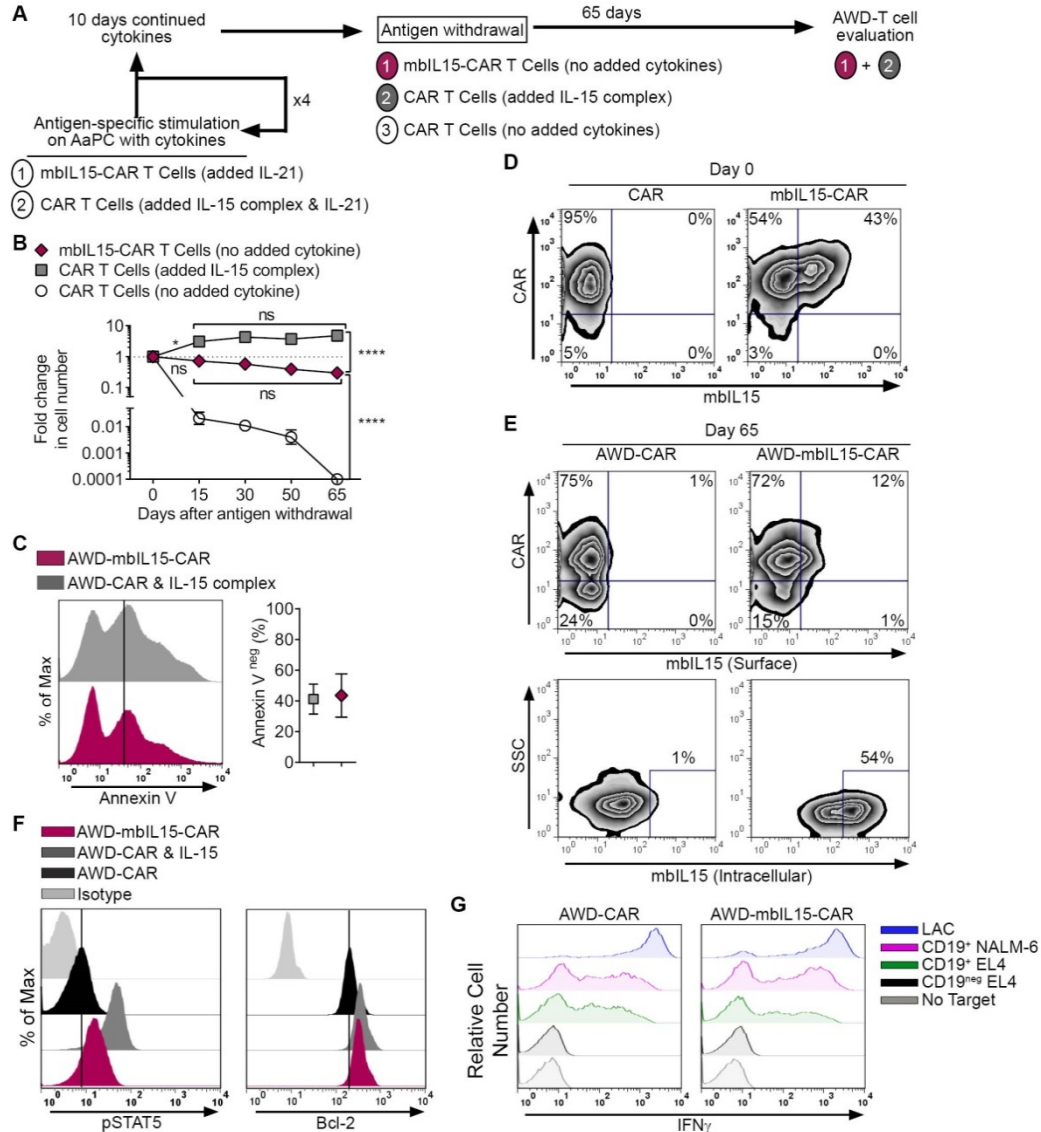

**Fig. S3. Prolonged *in vitro* persistence of mbIL15-CAR T cells without CAR activation maintains IL-15 signaling and antigen-specific response.** (A) Schematic summarizing the experimental design. T cells persisting at the end of the assay are termed AWD-T cells. (B) Fold change in T cell number under antigen and cytokine withdrawal conditions. \* $P < 0.05$ , \*\*\*\* $P < 0.0001$ , ns = not significant, two-way RM ANOVA (Tukey's post-test). Data displayed as mean  $\pm$  SD. (C) Representative histogram showing Annexin V staining (left panel) and plotted live T cell (Annexin V<sup>neg</sup>) frequencies (right panel). (D, E) Representative flow plots showing CAR and mbIL15 expression on T cells on day 0 (D) and day 65 (top panel) (E) with FLAG staining detecting intracellular localization of mbIL15 (bottom panel). (F) Representative histograms showing fluorescence intensity of pSTAT5 (left panel) and Bcl-2 (right panel). AWD-CAR T cells cultured with IL-15 complex were left without cytokine or treated with IL-15 to serve as positive and negative controls, respectively. Vertical bar references median fluorescence of the AWD-CAR negative control. (G) IFN $\gamma$  production of T cells stimulated with CD19<sup>+</sup> or CD19<sup>neg</sup> targets, Leukocyte Activating Cocktail (LAC), or media alone. Histograms represent cells selected for expression of CD3 and CAR. All data are representative of three donors.

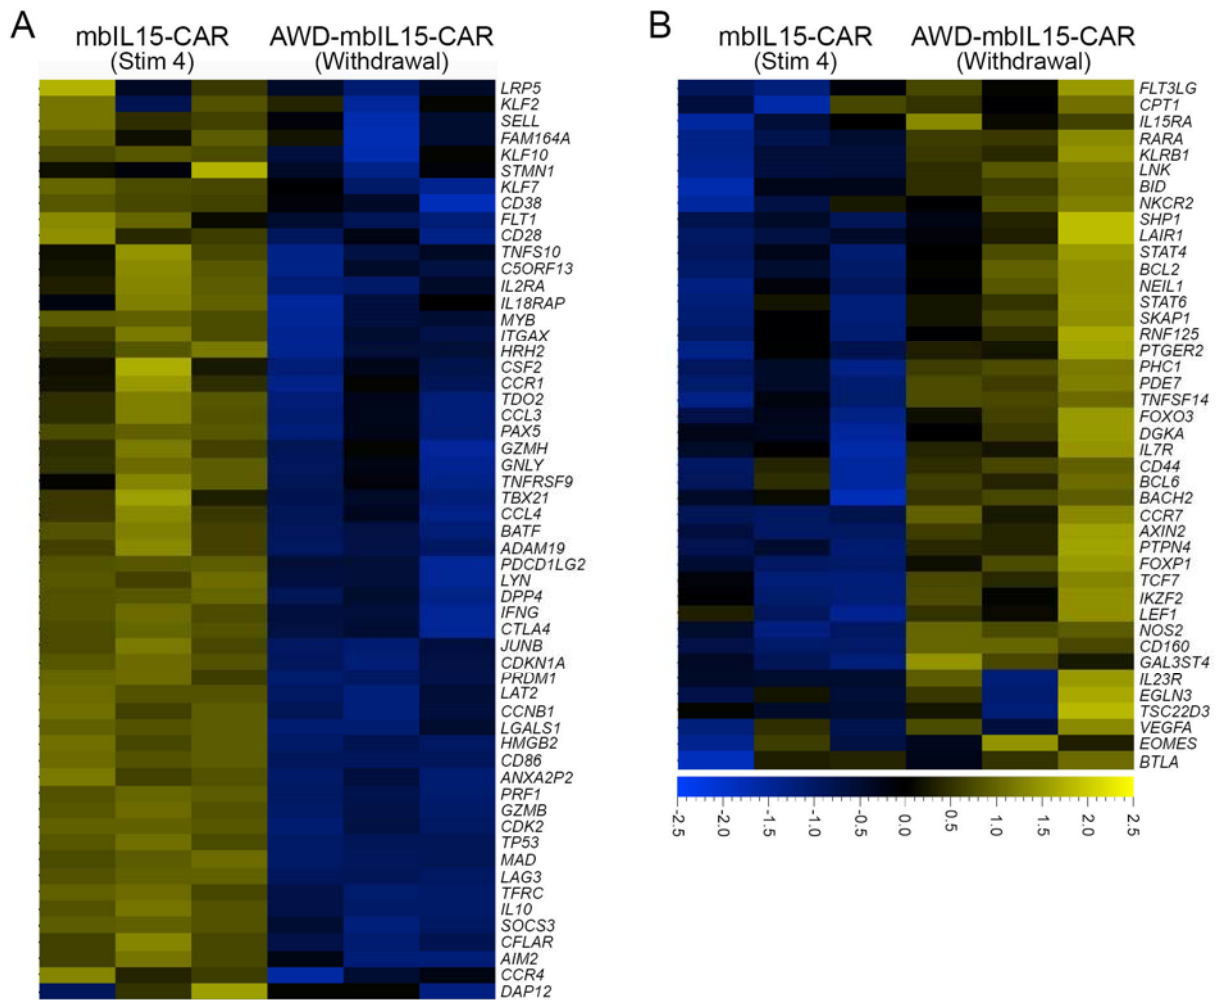

**Fig S4. Differentially expressed genes among stim 4 and antigen withdrawal mbIL15-CAR T cells.** Heat maps of significantly differentially expressed genes (2-fold cutoff,  $P < 0.01$ , FDR  $q$  value  $< 0.05$ ) that were (A) downregulated and (B) upregulated in AWD-mbIL15-CAR T cells relative to mbIL15-CAR T cells,  $n = 3$ .

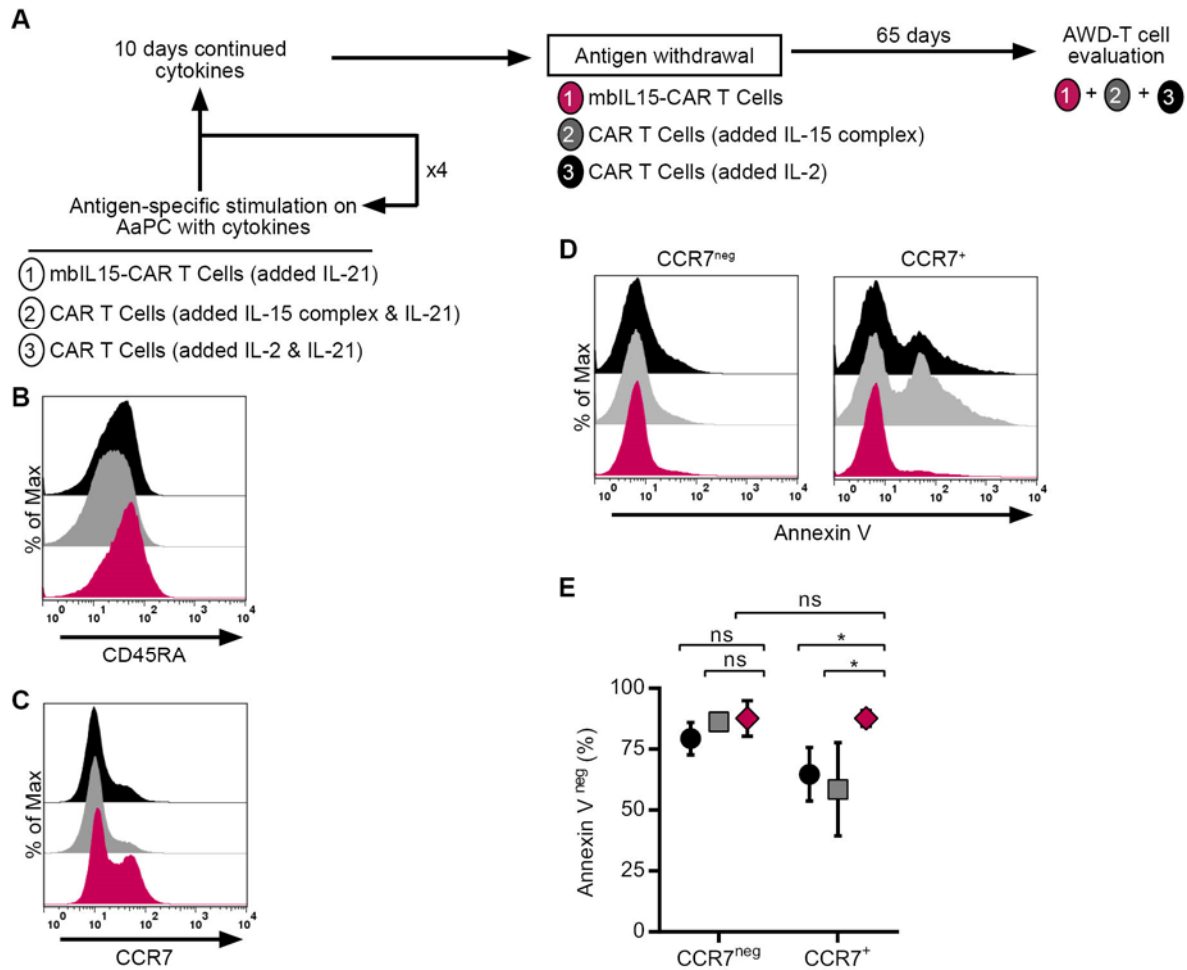

**Fig. S5. Tethered IL-15 supports survival of CCR7<sup>+</sup> T cells.** (A) Schematic summarizing the antigen withdrawal experiment comparing the impact of IL-2, IL-15/IL15R $\alpha$  complex, and mbIL15 on CD45RA and CCR7 phenotype. During the 65-day antigen withdrawal, mbIL15-CAR T cells received no exogenous cytokine supplementation, while CAR T cell control treatments received either IL-2 (50 U/ml) or IL-15/IL15R $\alpha$  complex (5 ng/ml). A representative histogram of (B) CD45RA and (C) CCR7 expression on AWD-T cells. (D) Representative histograms showing Annexin V levels in CCR7<sup>neg</sup> and CCR7<sup>+</sup> AWD-T cell subsets. Histograms display the lymphocyte population and respective CCR7 subsets selected by gating. (E) Graph plotting frequencies of live (Annexin V<sup>neg</sup>) AWD-T cell treatment cohorts in the CCR7<sup>neg</sup> and CCR7<sup>+</sup> subsets. Data are represented as mean  $\pm$  SD. \* $P$  < 0.05, ns = not significant, two-way ANOVA (Tukey's post-test). All data are representative of three donors. Color legend: CAR T cells supplemented with IL-2 (black), CAR T cells supplemented with IL-15/IL15R $\alpha$  complex (grey), and mbIL15-CAR T cells (magenta).

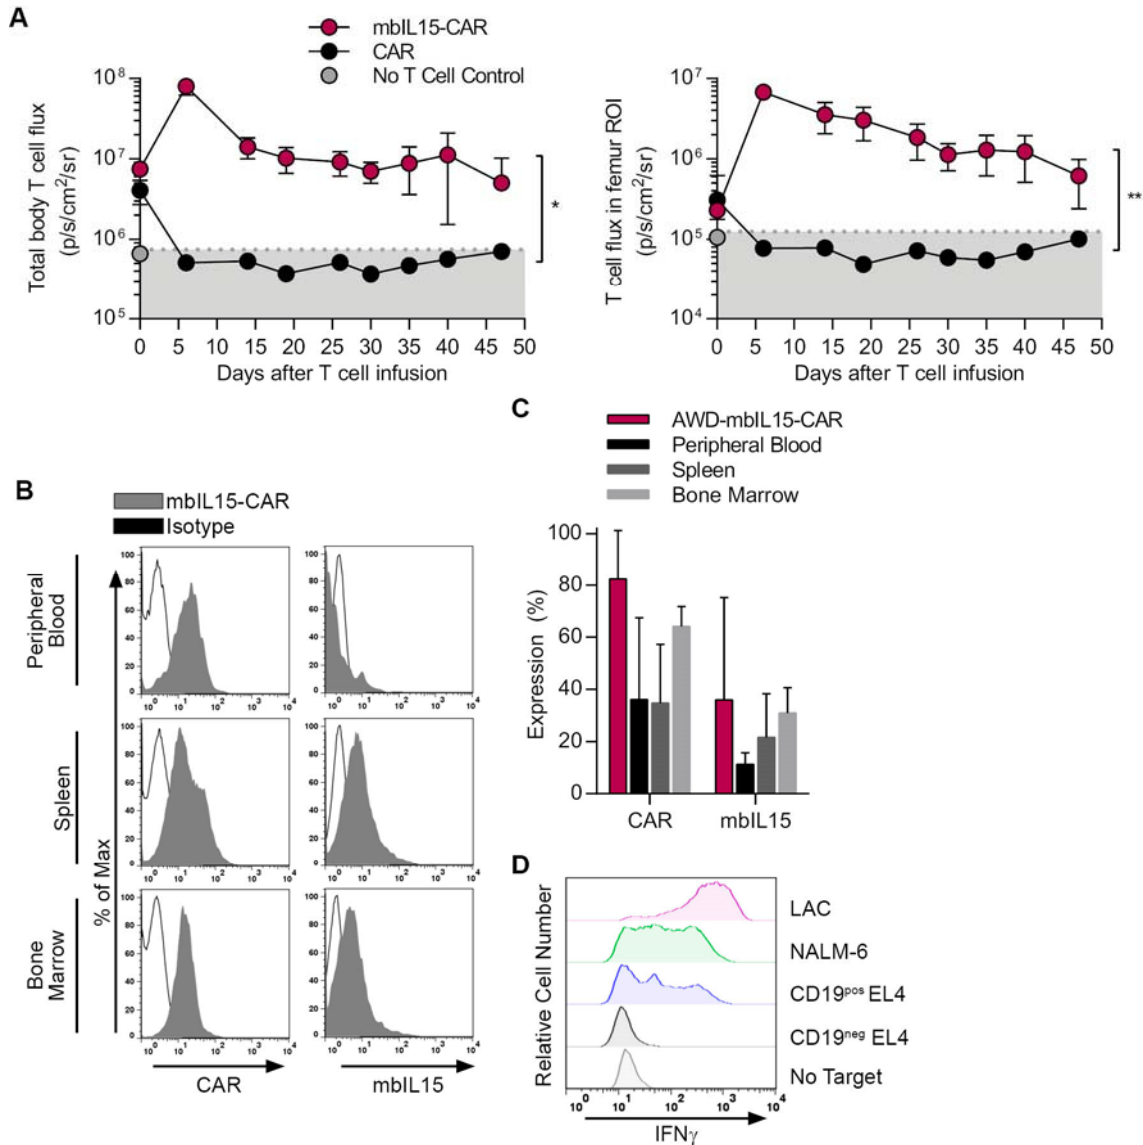

**Fig. S6. Long-term *in vivo* engraftment, phenotype, and functionality of mbIL15-CAR T cells independent of CAR signaling.** NSG mice were injected i.v. with  $2 \times 10^7$  *ffLuc*<sup>+</sup>CAR T cells with or without co-expression of mbIL15. Infused T-cell number based on CAR T cells. **(A)** Longitudinal plotting of T cell flux. Background BLI (*gray shaded*) was derived by imaging mice without *ffLuc*<sup>+</sup> T cells that were treated with D-luciferin. Data are represented as mean  $\pm$  SD,  $n = 5$ , and are representative of two experiments. **(B)** Peripheral blood, spleen, and bone marrow were analyzed after 48 days *in vivo*. Representative histograms show expression of CAR and mbIL15 and **(C)** plotted frequencies of marker expression represented as mean  $\pm$  SD. Plots and graphs (**B-C**) show T cell frequencies after gating on human CD3<sup>+</sup> and mouse CD45<sup>-</sup> cells in the peripheral blood ( $n = 5$ ), spleen ( $n = 9$ ), and bone marrow ( $n = 9$ ). **(D)** Cells isolated from spleen, liver, or bone marrow were *ex vivo* expanded on AaPC to generate cells for assessing intracellular IFN<sub>γ</sub> production in response to CD19<sup>-</sup> and CD19<sup>+</sup> targets,  $n = 7$  from three tissue sources and four mice. Histograms represent CD3<sup>+</sup> cells.

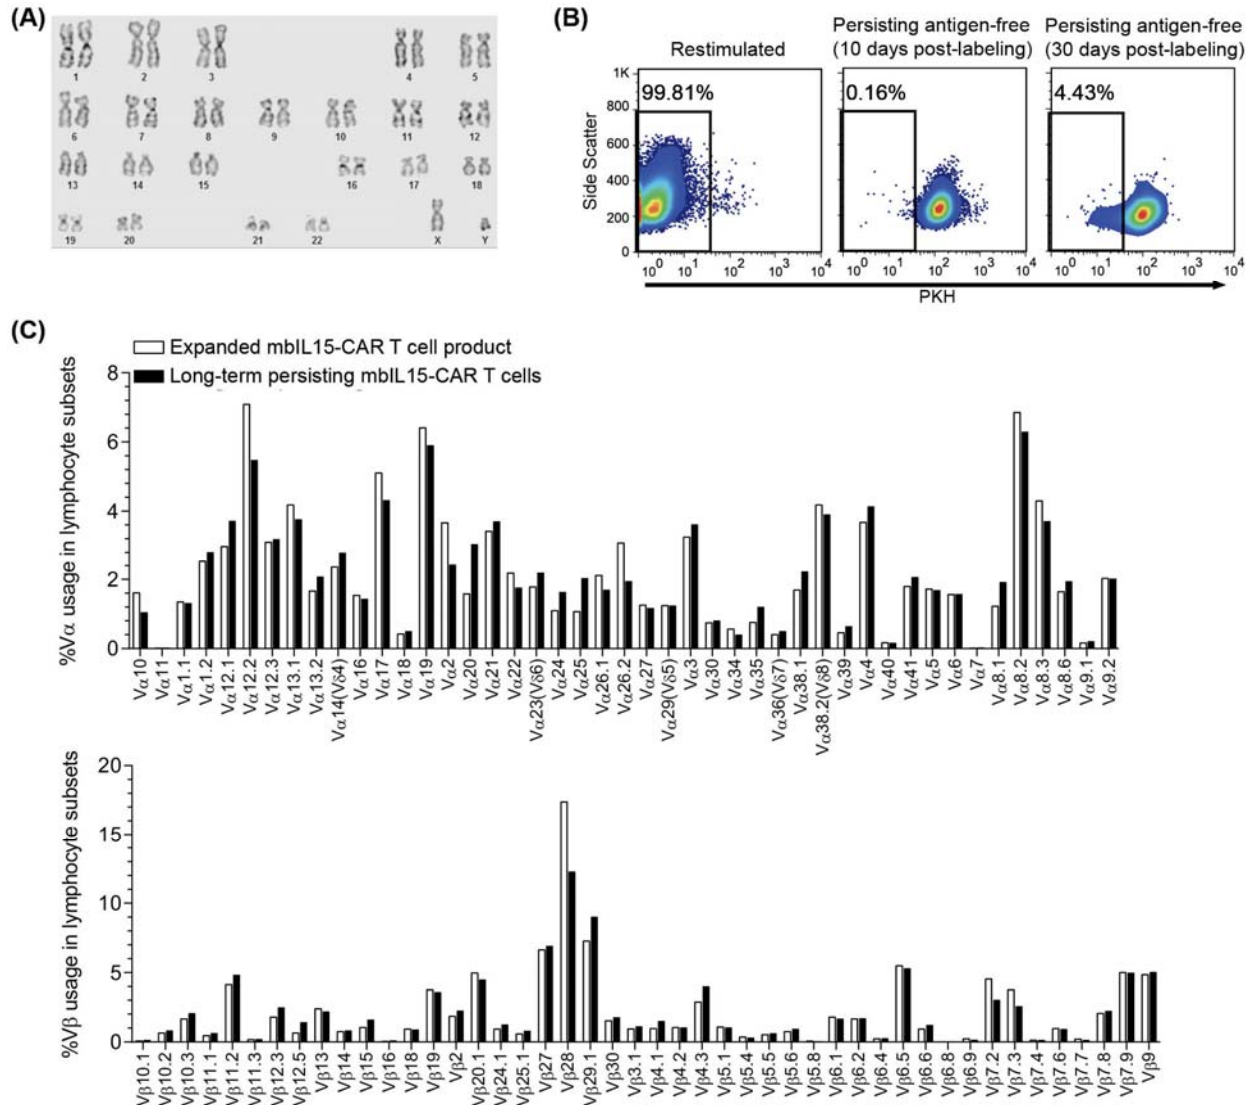

**Fig. S7. Prolonged *in vitro* persistence of mbIL15-CAR T cells does not induce aberrant autonomous proliferation or evidence of T-cell transformation.** (A) G-banding cytogenetic evaluation showing normal karyotype of *ex vivo* propagated mbIL15-CAR T cells persisting *in vitro* long-term (1 year for 3 donors and 2 years for one donor) under antigen-free conditions and without exogenous cytokines. A representative donor is shown. (B) Homeostatic proliferation, as determined by dilution of the PKH red fluorescent dye, of mbIL15-CAR T cells persisting in long-term continuous culture under antigen-free conditions and without exogenous cytokines ( $n = 3$ ). The proliferation control was the restimulation of the resting T cells with  $\gamma$ -irradiated AaPC clone #9 showing PKH dilution 10 days after labeling (*left panel*). Gates show the percentage of PKH diluted cells. (C) Assessment of TCR polyclonality of the long-term persisting mbIL15-CAR T cells by quantification of mRNA species coding for V $\alpha$  and V $\beta$  alleles using a designer TCR expression array as previously described (14). Control TCR V $\alpha$  and V $\beta$  repertoires are the expanded mbIL15-CAR T cells prior to antigen withdrawal. Bars represent the average percentage of V $\alpha$  and V $\beta$  allele usage in four normal donors.

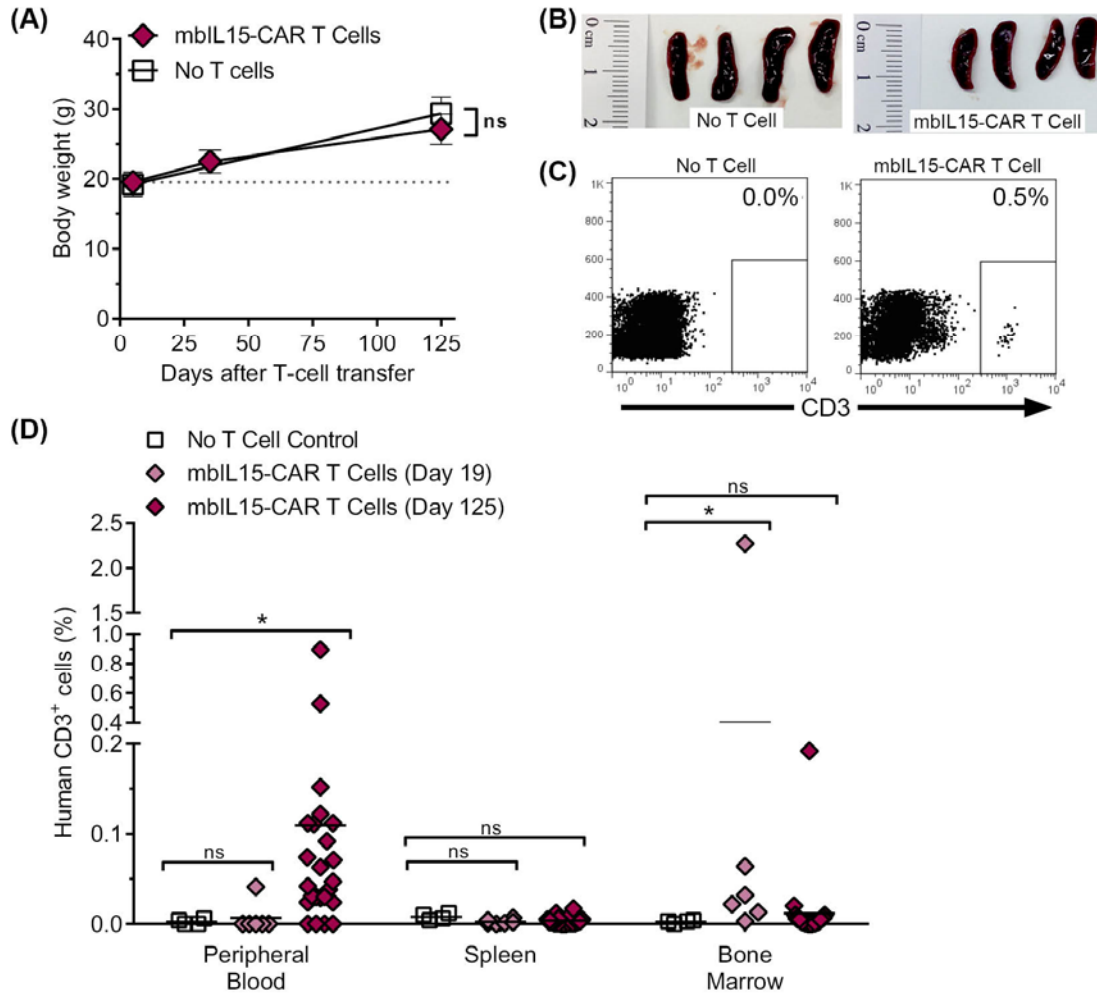

**Fig. S8. mbIL15-CAR T cells persisting *in vivo* long-term do not show aberrant autonomous growth or toxicity to recipient mice.** NSG mice (tumor-free and no exogenous cytokines) were injected i.v. with  $5 \times 10^6$  mbIL15-CAR T cells to assess long-term safety of persisting T cells. **(A)** Body weight to monitor for toxicity from adoptively transferred genetically modified T cells ( $n = 8$ , 3 donors). **(B)** Representative photos of spleens harvested from mice sacrificed at day 125. **(C)** Human CD3<sup>+</sup> cell frequencies were assessed by flow cytometry, with representative flow plots from peripheral blood shown. **(D)** Human CD3<sup>+</sup> cell frequencies observed in the peripheral blood, spleen, and bone marrow at days 19 and 125 of mice treated with mbIL15-CAR T cells. \* $P < 0.05$ , ns = not significant.

**Table S1. nCounter Analysis System Lymphocyte-specific CodeSet**

| Gene Name      | Accession      | Target Region | Target Sequence                                                                                         |
|----------------|----------------|---------------|---------------------------------------------------------------------------------------------------------|
| <i>ABCB1</i>   | NM_000927.3    | 3910-4010     | TATAGCACTAAAGTAGGAGACAAAGAACTCAGCTCTCTGGTGCCAGAAACAACGCATTGCCATAGCTCGTGC<br>CCTTGTITAGACAGCCTCATATTTTTC |
| <i>ABCG2</i>   | NM_004827.2    | 285-385       | AGGATTTAGGAACGCACCGTGCACATGCTTGGTGGTCTTGTAAAGTGAAACTGCTGCTTITAGAGTTTGTGG<br>AAGTCCGGGTGACTCATCCCAACAT   |
| <i>ACTB</i>    | NM_001101.2    | 1010-1110     | TGCAGAAGGAGATCACTGCCTGGCACCCAGCACAAATGAAGATCAAGATCATTGTCTCTCGAGCCAAAGTA<br>CTCCGTGTGGATCGCGCGTCCATCCT   |
| <i>ADAM19</i>  | NM_023038.3    | 1690-1790     | GAGAAGGTGAATGTGGCAGGAGACACCTTTGGAACTGTGGAAAGGACATGAATGGTGAACACAGGAAGTGCA<br>ACATGAGAGATGCGAAGTGTGGGAAGA |
| <i>AGER</i>    | NM_001136.3    | 340-440       | GAAAGGAGACCAAGTCCAACCTACCGAGTCCGTGTCTACCAGATTCTGGGAAGCCAGAAATGTAGATTCTGCC<br>TCTGAACCTACGGTGGTGTCCCAA   |
| <i>AHNAK</i>   | NM_001620.1    | 15420-15520   | GAATTTGACCTAAGTGTCTGGGGGAAATGATGCCAGCCTCAAGGCTCCGGATGTAGATGTCAACATCG<br>CAGGGCCGGATGCTGCACTCAAAGTCG     |
| <i>AIF1</i>    | NM_032955.1    | 315-415       | AAAAGCGAGAGAAAAGAAAAGCCAACAGGCCCCCGCCAGCAAGAAAGTATCTCTGAGTTGCCCTGATTTGAA<br>GGGAAAAGGGATGATGGGATTGAAGGG |
| <i>AIM2</i>    | NM_004833.1    | 607-707       | ACGTGCTGCACCAAAGTCTCCCTCATGTTAAGCCTGAACAGAAACAGATGGTGGCCAGCAGGAATCTATCA<br>GAGAAGGGTTTCAGAAGCGCTGTTTG   |
| <i>AIMP2</i>   | NM_006303.3    | 507-607       | CCCTCTCCCTGCTTGTGCTGCACAGCGTCTCTGTGAGCACTTCAGGGTCCGTCCACGGTGCACACGCACTC<br>CTCGGTCAAGAGCGTGCCTGAAACCT   |
| <i>AKIP1</i>   | NM_020642.3    | 570-670       | GAACATCTTAAGGACCTACATAGAGTATATCCAGGGACCTATTCTGTCACTGTGGCTCAAATGACTTAAC<br>CAAGAAGACTCATGTGGTAGCAGTT     |
| <i>AKT1</i>    | NM_005163.2    | 1772-1872     | TTCTTTGCCGGTATCGTGTGGCAGCAGGTGTACGAGAAGAAGCTCAGCCACCCCTCAAGCCCCAGGTCACGT<br>CGGAGACTGACACCAGGATTTTGTATG |
| <i>ALDH1A1</i> | NM_000689.3    | 11-111        | ATTGCTGAGCCAGTCACTGTGTCCAGGAGCCGAATCAGAAATGTCATCCTCAGGCACGCCAGACTTACCTGT<br>CCTACTACCGATTGGAAGATTCAAT   |
| <i>ANXA1</i>   | NM_000700.1    | 515-615       | GAAATCAGAGACATTAACAGGGTCTACAGAGAGAACTGAAGAGAGATCTGCCAAAGACATAACCTCAGACA<br>CATCTGGAGATTTTCGGAACGCTTTGC  |
| <i>ANXA2P2</i> | NR_003573.1    | 257-357       | ATATTGTCTTCTCCTACCAGAGAAAGCAAAAAGGAACTGCATCAGCACTGAAGTCAGCCTTATCTGGCCAC<br>CTGGAGACGGTATTTTGGGCTATT     |
| <i>APAF1</i>   | NM_181869.1    | 1160-1260     | TTCTGATGAACTGCAGAAATCTTGCACACGGTGGATCAGGATGAGAGTTTTCCAGAGGCTTCCACTTAATA<br>TTGAAGAGGCTAAGACCGTCTCCG     |
| <i>ARG1</i>    | NM_000045.2    | 505-605       | AAGGAACATAAAGGAAAGATTCCCGATGTGCCAGGATTCTCCTGGTGACTCCCTGTATATCTGCCAAGGATAT<br>TGTGTATATTGGCTTGAGAGACGTGG |
| <i>ARRB2</i>   | NM_004313.3    | 1652-1752     | CATTAATTTTTGACTGCAGCTCTGCTTCTCCAGCCCGCGTGGTGGCAAGCTGTGTTACATACCTAAATTTTC<br>TGGAAGGGGACAGTAAAAGAGGAG    |
| <i>ATF3</i>    | NM_001030287.2 | 600-700       | GGCTCAGAATGGGAGGACTCCAGAGTGTGCCAGGATTCTCCTGGTGACTCCCTGTATATCTGCCAAGGATAT<br>GCTAAGCAGTCTGGTATGGGGCGA    |
| <i>ATM</i>     | NM_000051.3    | 30-130        | ACGTAAGTCGCTGGCCATTGGTGGACATGGCGCAGGCGGTTTGTCTCCAGCGGCCGAATGTTTTGGGGCA<br>GTGTTTTGAGCGCGGAGACCCGCTGATA  |
| <i>ATP2B4</i>  | NM_001684.3    | 7640-7740     | CTTCCATAGTATCACTGTCCCTGGAATGACTCTCTGTCCCTAAAGGGTTAAGAGAGAGATCACCTAGAA<br>ATCCCTCTGGACACTTGTGGTCTT       |
| <i>AXIN2</i>   | NM_004655.3    | 1035-1135     | CTTGCCAGCAAACCTCTGAGGGCCACGGCAGTGTGAGGTCCACGAAACTGTTGACAGTGGATACAGGTCC<br>TTCAAGAGGAGCGATCCTGTTAATCCT   |
| <i>B2M</i>     | NM_004048.2    | 25-125        | CGGGCATTCTGAAGCTGACAGCATTCCGGCCGAGATGTCTCGTCCGTGGCCTTAGCTGTCTCGCTACT<br>CTCTCTTCTGGCCTGGAGCTATCCA       |
| <i>B3GAT1</i>  | NM_018644.3    | 145-245       | CTGACAGCGACCCCTTCTCAGACTCCAGTTGGGCCGACTCTCCAAACCTGCTCCGCAATGGTGGGTTGT<br>GAGTGTGGTAAATGAGGAGCCGTGGGT    |
| <i>BACH2</i>   | NM_021813.2    | 3395-3495     | TGTGGCACTGTTCACTGCTGTCCCGAAGAAACCGAGAACACATTTGGTGCACACTACAGCGGTCTTAGCAGCA<br>ATACTGTTCCGAAGTACTCTCTCTC  |
| <i>BAD</i>     | NM_004322.2    | 195-295       | CAGCTGTGCCTTACTACGTAACATCTTGTCTCAGAGCCAGAGCATGTCCAGATCCAGAGTTGAGCCGA<br>GTGAGCAGGAAGACTCCAGCTCTGCA      |
| <i>BAG1</i>    | NM_004323.3    | 1490-1590     | CTTGTGTGATCGTGTAGTCCCATAGCTGTAAAACAGAAATCACCAGGAGTTGCACCTAGTCAGGAATATTGGG<br>AATGGCCTAGAACAAGGTGTTGGCA  |
| <i>BATF</i>    | NM_006399.3    | 825-925       | CAGTGTGGGTGACAGGCCAATGCAGAAGATTAAGAAAGATGCTCAAGTCCCATGGCAGAGCAAGGGC<br>GGCAGGGAACGGTATTTTTCTAATA        |
| <i>BAX</i>     | NM_138761.2    | 694-794       | ATTTTTCTGGGAGGGGTGGGATGGGGACATGGGCATTTTTCTTACTTTTGAATTAATGGGGGTGTGGGG<br>AAGAGTGGTCTGAGGGGTAATAAA       |
| <i>BCL10</i>   | NM_003921.2    | 1250-1350     | TGAAAATACCATCTTCTTCAACTACACTCCCAGACCTGGGGACCCAGGGCTCTCTTTGCCACCAGATC<br>TACAGTTAGAAGAAGAAGAACTGT        |
| <i>BCL11B</i>  | NM_022898.1    | 3420-3520     | GAGATGTAGCACTCATGTCGTCCCGGCAAGCGGCCTTTCTGTGTTGATTTCCGGCTTTCATATTACATAAGG<br>GAAACCTTGAGTGGTGGTCTGGGG    |
| <i>BCL2</i>    | NM_000633.2    | 1525-1625     | CCAAGCACCGCTTCTGTGGCTCCACCTGGATGTTCTGTGCCTGTAACATAGATTGCTTTCCATGTTGTTGG<br>CCGGATCACCATCTGAAGAGCAGCG    |
| <i>BCL2L1</i>  | NM_138578.1    | 1560-1660     | CTAAGAGCCATTTAGGGCCACTTTTACTAGGGATTGAGGCTGCTGGGATAAAGATGCAAGGACCAGGACT<br>CCCTCTCACCTCTGGACTGGCTAGAG    |
| <i>BCL2L1</i>  | NM_001191.2    | 260-360       | ATCTGGCTTTGGATCTTAGAAGAGAATCACTAACCAGAGACGAGACTCAGTGAGTGAAGAGGTTTGGACA<br>ATGGACTGTTGAGCCATCCCTATT      |



|                   |                |           |                                                                                                          |
|-------------------|----------------|-----------|----------------------------------------------------------------------------------------------------------|
| <i>BCL2L11</i>    | NM_138621.2    | 2825-2925 | TGTTGGCACCAGAACTTAAAGCGATGACTGGATGCTCTGACTGTATGTATCTGGTTATCAAGATGCCTCTGTG<br>CAGAAAGTATGCCTCCCGTGGGTAT   |
| <i>BCL2L11</i>    | NM_138621.4    | 257-357   | CGGACTGAGAAACGCAAGAAAAAGACCAAATGGCAAAGCAACCTTCTGATGTAAGTTCTGAGTGTACCGAG<br>AAGGTAGACAATTGCAGCCTGCGGAG    |
| <i>BCL6</i>       | NM_001706.2    | 675-775   | GTTGTGGACACTTGC CGGAAGTTTATTAAGCCAGTGAAGCAGAGATGGTTTCTGCCATCAAGCCTCCTCGTGA<br>AGAGTTCCTCAACAGCCGGATGCTGA |
| <i>BCL6B</i>      | NM_181844.3    | 2135-2235 | CTTTATTGTCTAGGGCAGCTCTGGCAACATCGGGATTGTGGAATTGGTCCAGGAACCCCTCTCTGGTATTCT<br>GGATGTTGTAGGTTCTCTAGCAGTCT   |
| <i>BHLHE41</i>    | NM_030762.2    | 655-755   | CGCCATTTCAGTCCGACTTGGATGCGTTCCTCCGCGGATTCAAAATCGCCAAAGAAGTCTTGAATACCTC<br>TCCCGGTTGAGAGCTGGACACCCAG      |
| <i>BID</i>        | NM_197966.1    | 2095-2195 | GCTTAGCTTTAGAAACAGTGCACACTGGTCTGCTGTTCCAGTGGTAAGCTATGCCAGGAATCAGTTAAAA<br>GCACGACAGTGGATGCTGGGTCCATA     |
| <i>BIRC2</i>      | NM_001166.3    | 1760-1860 | TGGGATCCACTCTAAGAATCGTCTCAATGAGAAACAGTTTTGCACATTATTATCTCCACCTTGGAAACATA<br>GTAGCTTGTTCAGTGGTCTTACTC      |
| <i>BLK</i>        | NM_001715.2    | 990-1090  | AGCTTCTTGTCCAATCAACAGGCGGCTCTTTCTTATCAGAGAGAGTAAACCAACAAAGGTGCCTTCTCC<br>CTGTCTGTGAAGGATGTCACCACTC       |
| <i>BMI1</i>       | NM_005180.5    | 1145-1245 | CCTGGAGAAGGAATGGTCCACTTCCATTGAAATACAGAGTTCGACCTACTGTAAAAGAATGAAGATCAGTCC<br>CAGAGAGATGGACTGACAAATGCTGG   |
| <i>BNIP3</i>      | NM_004052.2    | 325-425   | CACCTCGCTGCAGACCCACAAGATCAACAGGGCTTCTGAAACAGATACCCATAGCATTGGAGAGAAAAAC<br>AGCTCACAGTCTGAGGAAGTATGAT      |
| <i>BTLA</i>       | NM_001085357.1 | 890-990   | GCACCAACAGAATATGCATCCATATGTGTGAGGAGTTAAGTCTGTTTCTGACTCCAACAGGGACCATTGAATGA<br>TCAGCATGTTGACATCATTGTCTGGG |
| <i>C21orf33</i>   | NM_004649.5    | 1340-1440 | TTGAGTTAATCAGCGTAAGGCGATTTCTAAAGCAGGCAATCCCTGTAGCCGAGAGAATAAACGCCTTCCAAA<br>ATGGCAACTTCCACAGCCATTTC      |
| <i>CA2</i>        | NM_000067.2    | 575-675   | AGCTGTGCAGCAACTGATGGACTGGCGTCTTAGTATTTTTGAGGTTGGCAGCGCTAAACGGGCGCTTC<br>AGAAAGTTGTTGATGCTGGATTCC         |
| <i>CA9</i>        | NM_001216.2    | 960-1060  | CAGTCCCAGGACTGGACATATCTGCACCTCTGCCCTCTGACTTCAGCCGCTACTTCCAATATGAGGGTCTCT<br>GACTACACCGCCCTGTGCCACGGGTG   |
| <i>CARD9</i>      | NM_052813.2    | 1850-1950 | CGCTGACTTGGCTGGAACGAGGAATCTGGTCCCTGAAAGGCCAGCCGACTGCCGGCATTGGGGCCGT<br>TTGTTAAGCGGCACTATTTTGGCGAGG       |
| <i>CASP1</i>      | NM_033292.2    | 575-675   | ACAGGCATGACAATGCTGTACAAAATCTGGGTACAGCGTAGATGTAAAAAATCTCACTGCTTCGGACAT<br>GACTACAGAGCTGGAGCAATTTGCAC      |
| <i>CAT</i>        | NM_001752.2    | 1130-1230 | ATGCTTCAGGGCCGCTTTTTCCTATCCTGACACTACCCGCATCGCTGGACCAATTATCTTCATATACC<br>TGTGAATCTCCTACCCTGCTCGAG         |
| <i>CBLB</i>       | NM_170662.3    | 3195-3295 | TAATGTGGAAGTTGCCCGGAGCATCTCCGAGAAATTCCTTCCCTCCTCCAGTATCCCACGTCTAAATCTATA<br>GCAGCCAGAAGTGTAGACAAAA       |
| <i>CCBP2</i>      | NM_001296.3    | 1345-1445 | GAACAGATGGGAACAGCTCAATGGGTGCCACTCAAAGTCTCTCCAGGGGCTCAGTACTGTGTTGC<br>TAAACCCAGTGGTCACTTCTCAGTCT          |
| <i>CCL3</i>       | NM_002983.2    | 681-781   | CTGTGTAGGCACTATGGCACAAAGCCACCAGACTGACAAATGTGTATCGGATGCTTTTGTTCAGGGCTGTGA<br>TCGGCCTGGGAAATAATAAAGATGC    |
| <i>CCL4</i>       | NM_002984.2    | 35-135    | TTCTGCAGCCTCACTCTGAGAAAACCTCTTGGCCAAATACCATGAAGCTCTGCGTACTGTCTGTCTCTC<br>CTCATGCTAGTAGCTCTCTGCTC         |
| <i>CCL5</i>       | NM_002985.2    | 280-380   | AGTGTGTGCCAACCCAGAGAAGAAATGGTTCGGGAGTACATCAACTCTTGGAGATGAGCTAGGATGGAGAG<br>TCTTGAACCTGAACCTACACAAATT     |
| <i>CCNB1</i>      | NM_031966.2    | 715-815   | AACTTGAGGAAGAGCAAGCAGTCCAGACAAAATACCTACTGGTTCGGGAAGTCACTGGAAACATGAGAGCCAT<br>CCTAATTGACTGGCTAGTACAGGTTCA |
| <i>CCND1</i>      | NM_053056.2    | 690-790   | TTGAACACTTCTCTCCAAAATGCCAGGCGGAGGAGACAACAGATCATCCGCAAACACGCGCAGACCTT<br>CGTGGCCCTCTGTGCCACAGATGTGAA      |
| <i>CCR1</i>       | NM_001295.2    | 535-635   | CATCATTTGGGCCCTGGCCATCTTGGCTCCATGCCAGGCTTATACTTTTCCAAGCCCAATGGGAATCACTC<br>ACCACACCTGCAGCCTTCACTTCTC     |
| <i>CCR2</i>       | NM_001123041.2 | 20-120    | ACATTCTGTTGCTCATATCATGCAAATATCACTAGTAGGAGAGCAGAGATGGAAATGTTCCAGGTATAAAG<br>ACCCACAAGATAAAGAAGCTCAGAG     |
| <i>CCR4</i>       | NM_005508.4    | 35-135    | GGTCTTCTTAGCATCTGCTCTCTGAGCAAGCTGGCATTGCCTCACAGACCTTCTCAGAGCCGCTTTCAGA<br>AAAGCAAGCTGCTTCTGGTTGGGCC      |
| <i>CCR5</i>       | NM_000579.1    | 2730-2830 | TAGGAACATACTCAGCTCACACATGAGATCTAGGTGAGGATTGATTACCTAGTAGTCATTTTCATGGTTGTTGG<br>GAGGATTCTATGAGGCAACACAGG   |
| <i>CCR6</i>       | NM_031409.2    | 935-1035  | CTTTAACTGCGGATGCTGCTCTGACTTGCAATAGCATGGACCGGTACATCGCCATTGTACAGCCGACTAAGT<br>CATTCCGGCTCCGATCCAGAACACTA   |
| <i>CCR7</i>       | NM_001838.2    | 1610-1710 | TTCCGAAAACAGGCCTTATCTCCAAGACCAGAGATAGTGGGAGACTTCTTGGCTTGGTGAAGAAAAGCGGA<br>CATCAGCTGGTCAAAACAACCTCTGTA   |
| <i>CD160</i>      | NM_007053.2    | 500-600   | TTGATGTTCAACATAAGCAAGTACACCGTTGCACAGTGGGACCTACCAGTGTGTGCCAGAAGCCAGAAGTC<br>AGGTATCCGCCTTCAAGGGCATTCTT    |
| <i>CD19</i>       | NM_001770.4    | 1770-1870 | AGATTACACCTGACTTGAATCTGAAGACCTCGAGCAGATGATGCCAACCTCTGGAGCAATGTTGCTTAGGA<br>TGTGTGATGTGTGTAAGTGTGTG       |
| <i>CD19R-scfv</i> | SCFV013.1      | 204-304   | GGCACCAGTACAGCCTGACCATCTCCAACCTGGAGCAGGAGGACATGCCACCTACTTTTGCAGCAGGGCA<br>ACACACTGCCCTACACTTTGGCGGGC     |
| <i>CD19RCD28</i>  | MDA_00002.1    | 2-102     | CAGGTGTTCTGAAGATGAACAGCCTGCAGACCAGCAGACCCGCTACTACTGTGCCAAGCACTACTACTA<br>CGGCGCAGCTACGCCATGGACTACT       |
| <i>CD2</i>        | NM_001767.2    | 1400-1500 | TGGGTCTCACTACAAGCAGCCTATCTGTTAAGAGACTCTGGAGTTCTTATGTGCCCTGGTGGACACTTGCC<br>ACCATCCTGTGAGTAAAAGTAAATA     |

|                              |                |           |                                                                                                            |
|------------------------------|----------------|-----------|------------------------------------------------------------------------------------------------------------|
| <i>CD20-scfv (rutuximab)</i> | SCFV002.1      | 8-108     | GCTGTCCAGAGCCCCGCATCCTGAGCGCCAGCCCTGGCGAGAAGGTGACCATGACCTGCCGGGCCAGCA<br>GCTCTGTGAGCTACATGCACTGGTATCAG     |
| <i>CD226</i>                 | NM_006566.2    | 163-263   | TAAACAGATACGATAAAAGTCTTAAACCAAGACGCAGATGGGAAGAAGCGTTAGAGCGAGCAGCACTCACAT<br>CTCAAGAACCAGCCTTTCAAACAGTTT    |
| <i>CD244</i>                 | NM_016382.2    | 1150-1250 | AAGAGGAACACAGCCCTTCTTCAATAGCATATCTATGAAGTATTGGAAGAGTCAACCTAAAGCCAGAA<br>CCCTGCTCGATTGAGCCGCAAAGAGC         |
| <i>CD247</i>                 | NM_198053.1    | 1490-1590 | TGGCAGGACAGGAAAAACCCGTCAATGTACTAGGATACTGCTGCGTCATTACAGGGCACAGGCCATGGATGGA<br>AAACGCTCTCTGCTGCTGCTTTTTTCT   |
| <i>CD27</i>                  | NM_001242.4    | 330-430   | CCAGATGTGTGAGCCAGGAACATTCTCGTGAAGACTGTGACCAGCATAGAAAGGCTGCTCAGTGTGATCCT<br>TGATACCGGGGTCTCCTCTCTCCT        |
| <i>CD274</i>                 | NM_014143.2    | 684-784   | TAGGAGATTAGATCCTGAGGAAAAACATACAGCTGAATTGGTCATCCAGAACTACCTCTGGCACATCCTCCAA<br>ATGAAAGGACTCACTTGGTAATCTG     |
| <i>CD276</i>                 | NM_001024736.1 | 2120-2220 | ACATTTCTTAGGACACAGTACTGACCACATCACCACCCTTCTTCCAGTGTGCTGGACCATCTGGCTG<br>CCTTTTTCTCCAAAAGATGCAATAT           |
| <i>CD28</i>                  | NM_006139.1    | 305-405   | GCTTGTAGCGTACGACAATGCGGTCAACCTTAGCTGCAAGTATTCTACAATCTTCTCAAGGGAGTCCGGG<br>CATCCCTTACAAAAGGACTGGATAGT       |
| <i>CD300A</i>                | NM_007261.2    | 0-100     | CGGGGAAGTGAGAGTCCGGGATCAGTCTGCAAGCTACGGAGTCACTACAGGGAGAGGTCTCATCTAGAA<br>ATAGCCGAAGAACCTGCAGCCTCAACCA      |
| <i>CD38</i>                  | NM_001775.2    | 1035-1135 | CCTTGTACTCTGTGTTATGTCATACATGACTCAGCATACTGCTGGTGCAGAGCTGAAGATTTGGAG<br>GGTCTCCACAATAAAGTCAATGCCA            |
| <i>CD3D</i>                  | NM_000732.4    | 110-210   | TATCTACTGGATGAGTTCCGCTGGGAGATGGAACATAGCAGTTCCTCTGCGCTGGTACTGGCTACCCCTCT<br>CTCGCAAGTGAAGCCCTTCAAGATAC      |
| <i>CD3E</i>                  | NM_000733.2    | 75-175    | AAGTAACAGTCCATGAAACAAGATGCGAGTCCGGCACTCACTGGAGAGTTCGGGCTCTGCCTTTATCAGT<br>TGGCGTTTGGGGGCAAGATGTAATG        |
| <i>CD4</i>                   | NM_000616.3    | 835-935   | AGACATCGTGGTCTAGCTTTCCAGAAGCCCTCCAGCATAGTCTATAAGAAAGAGGGGAAACAGGTGGAGTTC<br>TCCTTCCACTCGCCTTACAGTTGAA      |
| <i>CD40LG</i>                | NM_000074.2    | 1225-1325 | GCATTTGATTTATCAGTGAAGATGCAGAAGGAAATGGGAGCCTCAGCTCACATTAGTTATGGTACTCTG<br>GGTTCTATGGCCTTGTGGAGGGGG          |
| <i>CD44</i>                  | NM_000610.3    | 2460-2560 | GTGGGCAGAGAAAAAGCTAGTGATCAACAGTGGCAATGGAGCTGTGGAGGACAGAAAGCAAGTGAGCTCAA<br>CGGAGAGGCCAGCAAGTCTCAGGAAAT     |
| <i>CD45R-scfv</i>            | SCFV006.1      | 222-322   | TTACCCTGAACATCCACCCTGGAGGAAAGAGGACGCCCCACCTACTACTGCCAGCACAGCAGAGAGCTG<br>CCCTTACCCTTCCGGCTCCGGCACCAAGC     |
| <i>CD47</i>                  | NM_001777.3    | 897-997   | GCCATATTGGTATTACAGGTATAGCCTATATCCTCGCTGTGGTGGACTGAGTCTCTGATTGCGGCGTGTAT<br>ACCAATGCATGGCCCTTCTTGATTT       |
| <i>CD56R-scfv</i>            | SCFV008.1      | 197-297   | ATTCAGCGCTCTGGCTCCGGCACCAGTCTCACTCTGATGATCTCTGGGTGGAGGCCGAGGACCTGGGCGT<br>GTACTACTGCTTTCAGGGCAGCCACGTG     |
| <i>CD58</i>                  | NM_001779.2    | 478-578   | GTGCTTGAGTCTCTTCCATCTCCACACTAATTTGTGATTGACTAATGGAAGCATTGAAGTCAATGCATGATA<br>CCAGAGCATTACAACAGCCATCGAG      |
| <i>CD63</i>                  | NM_001780.4    | 350-450   | GTCATCATCGAGTGGGTCTTCTCTTCTTCTGGTGGCTTTTGTGGGCTGCTCGGGGCTGCAAGGAGAACT<br>ATTGCTTATGATCACGTTTGCCATCT        |
| <i>CD69</i>                  | NM_001781.1    | 460-560   | AGGACATGAACCTTCTAAAACGATACGCAGGTAGAGAGGAACACTGGGTGGACTGAAAAAGGAACCTGGTCA<br>CCATGGAAAGTGGTCAAAATGGCAAAGA   |
| <i>CD7</i>                   | NM_006137.6    | 440-540   | CCTACACCTGCCAGGCCATCAGGAGGTCAATGTCTACGGCTCCGGCACCCCTGGTCTGGTGACAGAGGAAC<br>AGTCCCAAGGATGGCAGAGTCTCGGA      |
| <i>CD80</i>                  | NM_005191.3    | 1288-1388 | AAAGATCTGAAGTCCACCTCATTGCAATTGACCTTCTGGGAACTTCTCAGATGGACAAGATTACCC<br>ACCTTGCCTTACGTATCTGCTCT              |
| <i>CD86</i>                  | NM_006889.3    | 146-246   | TATGGGACTGAGTAACATCTCTTTGTGATGGCTTCTGCTCTCTGGTGTCTCTGAAGATTCAAGCTTA<br>TTCAATGAGACTGCAGACCTGCCA            |
| <i>CD8A</i>                  | NM_001768.5    | 1320-1420 | GCTCAGGGCTCTTCTCCACACCACTCAGGTCTTCTTCCGAGGCCCTGTCTCAGGGTGGAGTCTTGGT<br>CTCCACGGCAAGGGAACAAGTACTT           |
| <i>CDH1</i>                  | NM_004360.2    | 1230-1330 | CGATAATCCTCCGATCTCAATCCACCACGTACAAGGGTCAGGTGCCTGAGAACCAGGCTAACGTCGTAATCA<br>CCACACTGAAAGTGAAGTACTGATGCTGAT |
| <i>CDK2</i>                  | NM_001798.2    | 220-320   | TCGCTGGCGCTTATGAGAACTTCCAAAAGGTGAAAAGATCGGAGAGGCACGTACGGAGTTGTGTACAAA<br>GCCAGAAACAAGTTGACGGGAGAGGTG       |
| <i>CDK4</i>                  | NM_000075.2    | 1055-1155 | ACTTTTAAACCACACAAGCGAATCTCGCTTTCGAGCTCTGCAGCACTTTATCTACATAAGGATGAAGTAAT<br>CCGGAGTGAGCAATGGAGTGGCTGC       |
| <i>CDKN1A</i>                | NM_000389.2    | 1975-2075 | CATGTGCTGGTCCCGTTTCTCCACCTAGACTGAAACCTCTCGAGGGCAGGACCACACCTGTACTGTTTC<br>TGTGCTTTACAGCTCTCCACAA            |
| <i>CDKN1B</i>                | NM_004064.2    | 365-465   | GCTTCCGAGAGGGTTCCGGCCGCTAGGGGCGCTTTGTTTTGTTGCTTTGTTTTTTGAGAGTCCGAGAG<br>AGGCGGTCGTGCAGACCAGGGGAGAAAG       |
| <i>CDKN2A</i>                | NM_000077.3    | 975-1075  | AAGCGCACATTATGTTGGCATTCTTTCGCGACCTCGCAGCCTCCGGAAGCTGTCGACTTATGACAAGCATT<br>TGTGAAGTGGGAAAGCTCAGGGGGGT      |
| <i>CDKN2C</i>                | NM_001262.2    | 1295-1395 | ATAATGTAACGTCAATGCACAAAATGGATTTGGAAGACTGCGCTGCAGGTTATGAACTTGAAGATCCCGAG<br>ATTGCCAGGAGACTGCTACTTAGAGG      |
| <i>CEBPA</i>                 | NM_004364.2    | 1320-1420 | GAGCTGGGAGCCCGCAACTAGTATTTAGATAACCTTGTGCTTGGAAATGCAAACTACCCTCAATGC<br>CTACTGAGTAGGGGGAGCAAACTCGTG          |
| <i>CFLAR</i>                 | NM_003879.3    | 445-545   | CAAGACCTTGTGAGCTTCCCTAGTCTAAGAGTAGGATGTCTGCTGAAGTCATCCATCAGTTGAAGAAGCACT<br>TGATACAGATGAGAAGGAGATGCTGC     |
| <i>CFLAR</i>                 | NM_001127183.1 | 653-753   | TAGAGTCTGATGGCAGAGATTGGTGGAGATTGGATAAATCTGATGTGCTCTCATAATTTCTCATGAAGGA<br>TTACATGGGCCGAGGCAAGATAAGC        |

|                   |                |           |                                                                                                           |
|-------------------|----------------|-----------|-----------------------------------------------------------------------------------------------------------|
| <i>CHPT1</i>      | NM_020244.2    | 1303-1403 | GATATGGTGATATACTTTAGTGCTTTGTGCCTGCAAATTTCAAGACACCTTCATCTAAATATATTCAGACTGCAT<br>GTCAATCAAGCACCTGAACAGGTTTC |
| <i>CIITA</i>      | NM_000246.3    | 470-570   | GCCTGAGCAAGGACATTTTCAAGCACATAGGACCAGATGAAGTGATCGGTGAGAGATGGAGATGCCAGCAGA<br>AGTTGGGCAGAAAAGTCAGAAAAGACC   |
| <i>CITED2</i>     | NM_006079.3    | 965-1065  | AGGAGCTGCCCGAACTCTGGCTGGGGCAAACGAGTTTGATTTTATGACGGACTTCGTGTGCAAACAGCAGCC<br>CAGCAGAGTGAGCTGTTGACTCGATCG   |
| <i>CLIC1</i>      | NM_001288.4    | 310-410   | GTGATGGGCGCAAGATTGGAACTGCCATTCTCCAGAGACTGTTTCATGGTACTGTGGCTCAAGGGAGTCAC<br>CTTCAATGTTACCACCGTTGACACCAA    |
| <i>CLNK</i>       | NM_052964.2    | 1108-1208 | GAAGGAGAACAAGGATGGTAGTTTTCTGGTCCGAGATTGTTCCACAAAATCAAGGAAGAGCCCTATGTTTTGG<br>CTGTGTTTTATGAGAACAAAGTCTAC   |
| <i>c-MET-scfv</i> | SCFV004.1      | 138-238   | CTGATCTACGCCCGCAGCAGCTGAAGAGCGCGCTGCCAGCCGGTTAGCGGCTCTGGCTCTGGCCCGAC<br>TTCACCTGACCATCAGCAGCTGCAGC        |
| <i>CREB1</i>      | NM_004379.3    | 4855-4955 | TTTGATGGTAGTGCAGCAGCTGTAGTCTCTGAAAGACAATACCAGTCAGGCAGCTTATCCCATCAGATGT<br>CATCTGGCTGAAGTTTATCTCTGTCT      |
| <i>CREM</i>       | NM_001881.2    | 260-360   | CTCCACTCTCGCTCCGTAATCAGTGACGAGGTCCGCTACGTAATCCCTTTGGCGGACAAAATGACCAT<br>GGAAACAGTTGAATCCAGCATGATGG        |
| <i>CRIP1</i>      | NM_001311.4    | 269-369   | CAACCACCCCTGTACGCAGCCATGTTTGGGCTAAAGGCTTTGGCGGGGCGGAGCCGAGAGCCACACTTT<br>CAAGTAAACCAGTGGTGGAGACCCCAT      |
| <i>CRLF2</i>      | NM_022148.2    | 1420-1520 | CAAGCAGCACGTCCAAAATGCTGTAACCATCTCCCACTCTGTGAGTCCCAGTTCGTCATGTACCTGT<br>TCCATAGCATTGGATTCTCGGAGGAT         |
| <i>CSAD</i>       | NM_015989.4    | 205-305   | TCAAATCTTCTGCCTAGCCTTAGCCATTAGAGAGGTCCTGCTAAAGATGGACTGCAAATGCGCTTGATGGA<br>AGGAGATGTCAATTCACCTGAAGTCC     |
| <i>CSF2</i>       | NM_000758.2    | 475-575   | AGATGAGCTGGCCAAGCTGGGAGCTGCTCTCTCATGAAACAAGAGCTAGAAAATCAGGATGGTCACTTGG<br>AGGGACCAAGGGGTGGGCCACAGCCAT     |
| <i>CSNK2A1</i>    | NM_177559.2    | 1930-2030 | CCATTCACCATTTGTTCTCCACCGTCCACACTTTAGGGGTTGGTATCTCGTCTCTTCCAGAGATTAC<br>AAAAATGATAGTTCTCAGGGGAGGCA         |
| <i>CTGF</i>       | NM_001901.2    | 1100-1200 | ACCACCTGCGGTGGAGTTCAAGTGCCTGACGGCAGGTCATGAAGAAGACATGATGTTCAAGACCT<br>GTGCTGCCATTACAACGTGCCGGAG            |
| <i>CTLA4</i>      | NM_005214.3    | 405-505   | AGTCTGTGGCGCAACCTACATGATGGGGAATGAGTTGACCTTCTAGATGATTCATCTGCACGGGCACCTCCA<br>GTGGAAATCAAGTGAACCTCACTATC    |
| <i>CTNNA1</i>     | NM_001903.2    | 75-175    | TCGCCAGCTAGCCGAGAAATGACTGCTGTCCATGCAGGCAACATAAACTTCAAGTGGGATCCTAAAAGCTA<br>GAGATCAGGACTCTGGCAGTTGAGAG     |
| <i>CTNNB1</i>     | NM_001098210.1 | 1815-1915 | TCTTGCCCTTTGCCGCAATCATGCACCTTTGCGTGAGCAGGGTCCATTCCACGACTAGTTCAGTTGCTTG<br>TTCGTGCACATCAGGATACCCAGCCG      |
| <i>CTNBL1</i>     | NM_030877.3    | 855-955   | TGATGCCAACAATGTATTGCAAGTGAAGTGTGGCCATATTGCTCCAGGACAATGATGAAAACAGGGAATTGC<br>TTGGGGAGCTGGATGGAATCGATGTG    |
| <i>CTSC</i>       | NM_001114173.1 | 260-360   | TGCTCGGTTATGGGACCAAGAAAAAAGTAGTGGTGTACCTCAGAAGCTGGATACAGCATATGATGACCT<br>TGGCAATTCGGCCATTTCAACATCA        |
| <i>CTSD</i>       | NM_001909.3    | 1495-1595 | GAAGCCGGCGCCAGCCGACTTGCTGTTTTGTTCTGTGGTTTTCCCTCCCTGGGTTGAGAAATGCTGCC<br>TGCTGTCTGTCTCTCCATCTGTTTTG        |
| <i>CX3CL1</i>     | NM_002996.3    | 140-240   | AGCACCACGGTGTGACGAAATGCAACATCACGTGCAGCAAGATGACATCAAAGATACCTGTAGCTTTGCTCATC<br>CACTATCAACAGAACCCAGGCATCATG |
| <i>CX3CR1</i>     | NM_001337.3    | 1040-1140 | GGGCGCTCAGTCCAGTGTATTCTCCATCTGAATCACAAGGAGCAGGCATGGAAGTGTCTGAGCAGCA<br>ATTTTACTTACCACAGAGTGATGGAG         |
| <i>CXCL10</i>     | NM_001565.1    | 40-140    | GCAGAGAACCTCCAGTCTCAGCACCATGAATCAAATGCGATTCTGATTGCTGCCTTATCTTTCTGACTCTAA<br>GTGGCATTCAAGGAGTACCTCTCTC     |
| <i>CXCL12</i>     | NM_199168.2    | 505-605   | GGGCTGAGGTTTCCAGCATTTAGACCCTGCATTTATAGCATAAGGATGATATTGCAGCTTATATTCATCCAT<br>GCCCTGTACCTGTGCACGTTGGAAC     |
| <i>CXCL9</i>      | NM_002416.1    | 1975-2075 | CACCATCTCCATGAAGAAAGGGAACGGTGAAGTACTAAGCGCTAGAGGAAGCAGCAAGTCGGTTAGTGAA<br>GCATGATTGGTCCCAGTTAGCCTCTG      |
| <i>CXCR1</i>      | NM_000634.2    | 1950-2050 | GCAGCCACAGTCCATTGGCGAGCAGATGTTCTAATAAAGCTTCTGTTCCGTGCTTGTCCCTGTGGAAGTAT<br>CTTGGTTGTGACAGAGTCAAGGGTGT     |
| <i>CXCR3</i>      | NM_001504.1    | 80-180    | GTGAGTGACCACCAAGTGTAAATGACGCCGAGGTTGCCGCCCTCTGGAGAAGTTCAGCTTCTCTATGACT<br>ATGGAGAAAACGAGAGTACTCGTCT       |
| <i>CXCR4</i>      | NM_001008540.1 | 135-235   | GTCACTATGGGAAAAGATGGGGAGGAGTGTAGGATTCTACATTAATTCTTGTGCCCTTAGCCACTACT<br>TCAGAAATTCCTGAAGAAAGCAAGCC        |
| <i>DAPL1</i>      | NM_001017920.2 | 190-290   | CGAGAAAACAGTGCCATTGCAAAATGTTGCCAAAATACAGACACTGGATGCCCTGAATGACGCAGTGGAGAAG<br>CTCAACTATAAATTTCCAGCAACAGTG  |
| <i>DEC1</i>       | NM_017418.2    | 190-290   | AGGCCTTACTTTCCAGATCCAGATCCTGTGCATACAAGTACTTGTGTGGGTGAGGCTTGCAGAAAAATCAG<br>CTAGAACAGCCTTGGGGTAGTGGCA      |
| <i>DECTIN-1R</i>  | SCFV010.1      | 270-370   | CTGAAGATGCAGCAGCAGAACGAGCTGGGCTTCATCGTGAAGCAGGTGCCAGCCAGCCGACAACCTCTTCT<br>GGATCGGCCTGAGCAGGCCCCAGACCC    |
| <i>DGKA</i>       | NM_001345.4    | 1375-1475 | TTCTAACACCCACCACTTCTGCTTTTGTCAATCCTAAGAGTGGCGGAAGCAGGGGCAAAGGGTGTCTG<br>GAAGTCCAGTATATATTAACCCCTCG        |
| <i>DOCK5</i>      | NM_024940.6    | 630-730   | TGCGAGATGACAATGGGAACATCCTAGACCCTGACGAAACAGCACCATTGCCCTCTCAAGGCCATGAGGT<br>GGCCTCCAAAAGGATTGAGGAAAAGAT     |
| <i>DOK2</i>       | NM_003974.2    | 650-750   | GCCAGGGACCCAGCTGTACACTGGCCCTACAGTTTTCTGCGCGCTTTGGCGGGACAAGGTAACCTTTTCC<br>TTTGAGGCAGGCCGTCGCTGCTCTCT      |
| <i>DPP4</i>       | NM_001935.3    | 2700-2800 | CAGCAGTCAGCTCAGATCTCAAAGCCCTGGTGCATGTTGGAGTGGATTCCAGGCAATGTGGTATACTGATGA<br>AGACCATGGAATAGCTAGCAGCACAG    |

|                                        |             |               |                                                                                                         |
|----------------------------------------|-------------|---------------|---------------------------------------------------------------------------------------------------------|
| <i>DUSP16</i>                          | NM_030640.2 | 615-715       | ATGGGTTAACTCTCTTTTCCAGTCACCACCAGCCTGACCTCATACACTTTTAGTACAATGGAGTGGCTGAG<br>CCTTTGAGCACACCACATTACATCA    |
| <i>EGFR-scfv_</i><br><i>(NIMO CAR)</i> | SCFV015.1   | 7-107         | AGTAGCCACAGCCCTAGCAGCCTGAGCGCCAGCGTGGGCGACAGAGTGACCATCACCTGCCGGTCCAGCC<br>AGAACATCGTGACAGCAACGGCAACAC   |
| <i>EGLN1</i>                           | NM_022051.1 | 3975-<br>4075 | AGCAGCATGGACGACCTGATACGCCACTGTAACGGGAAGCTGGGCAGCTACAAAATCAATGGCCGGACGAAA<br>GCCATGGT                    |
| <i>EGLN3</i>                           | NM_022073.3 | 800-900       | AAGCTACATGGTGGATCTCGGGATATTTCCAGAGGGGAAATCATTATAGCAGATGTGGAGCCATTTTGA<br>CAGACTCCTGTTCTTCTGGTCAGATC     |
| <i>EIF1</i>                            | NM_005801.3 | 869-969       | CCTGAACAGTCTCGGTGAATCTGAGAGGAGAGGATGGGTAAGGCAGAAGCACCAGCTGTACTACTAGAAGG<br>GAGCTTTTGGTGGTAGATCCCTGGTG   |
| <i>ELF4</i>                            | NM_001421.3 | 335-435       | AGCTCTGGAGGGCTCTGATAATCCCGTTGTGAGCTCTCTGAAAAGACAGCATGGCTATTACCCTACAGCCAGT<br>GACCTGATCTTTGAGTTCGCAAGCAA |
| <i>ELOF1</i>                           | NM_032377.3 | 125-225       | AGACCCAGTTCACCTGCCCTTCTGCAACCACGAGAATCCTGTGATGTAAAATGGACCGTGCCCGCAACAC<br>CGGAGTCATCTTTGACCGTGTGCCT     |
| <i>ENTPD1</i>                          | NM_001776.4 | 225-325       | TTGAGTAACTTTAGGAAAATGAGCTGCTGGACTCCTCAGTCAATCTGTCTTTCTAGTCAATGAAAAGACAGG<br>GTTTGAGGTTCTTCCGAAACGGGG    |
| <i>EOMES</i>                           | NM_005442.2 | 1670-<br>1770 | ATCCCATGCCCTGGGGTATTACCCAGACCCAACTTTCTGCAATGGCAGGTTGGGGAGTTCGAGGTTCTTAC<br>CAGAGGAAGATGGCAGCTGGACTACCA  |
| <i>EPHA2</i>                           | NM_004431.2 | 1525-<br>1625 | GAGCCGAGTGTGGAAGTACGAGTCACTTACCAGCAAGAAGGGAGACTCCAACAGCTACAATGTGCGCCGAC<br>CGAGGGTTTCTCCGTGACCTGGACGAC  |
| <i>EPHA4</i>                           | NM_004438.3 | 20-120        | GCAGCGTTGGCACCGGCAACCATGGCTGGATTTTCTAATTCGCCCTATTTTCGTGTCTTTCGGGATTGGC<br>ACGCTGTACAGGTTCCAGGGTATAC     |
| <i>EPHB2</i>                           | NM_017449.2 | 785-885       | CAAAGCAGGCTTCCAGGCGTTGAGAATGGCACCGTCTGCCGAGGTTGCCATCTGGACTTTCAAGGCCAAC<br>CAAGGGGATGAGGCTGTACCCACTGT    |
| <i>ETV6</i>                            | NM_001987.4 | 3840-<br>3940 | GTATGAATATGAAATCAGAGACCAGGCGATGATGTTGCTAGGATTAGAGCCTCTCAGTCTGGCTCTTACCCA<br>AGTGCAAGAAGTCACTCTTACTGT    |
| <i>FADD</i>                            | NM_003824.2 | 1560-<br>1660 | TGAGACTGCTAAGTACGGGCGAGTGGTGGCCAGGACGAATTGAGATAATATCTGTGAGGTGCTGATGAGT<br>ATTGACACACAGCACTCTCTAAATCTT   |
| <i>FAM129A</i>                         | NM_052966.2 | 3526-<br>3626 | TGCCAATAGATTCAAGAGAAGCTAAGCGGAAATGGAGGTTGAAGGTGTGATCTGTGGACTGTCTGGCCCT<br>GTTACTATCCTGCTATCAATTTCTTA    |
| <i>FANCC</i>                           | NM_000136.2 | 2130-<br>2230 | GACTCAGTCAGACATGTTCACTAATGACTCAAGTGAAGCTTCCGTTACTCTGGTCCCGCCCGCCAGACCGT<br>CAGCTTGATAATTACTAAAGCAAGGC   |
| <i>FAS</i>                             | NM_000043.3 | 90-190        | CACCGGGCTTTTCTGTGAGCTCGTCTCTGATCTCGCGCAAGAGTGACACAGGTTTCAAAGACGCTTCTGG<br>GGAGTGAGGGAAGCGGTTTACGAGTGA   |
| <i>FASLG</i>                           | NM_000639.1 | 625-725       | TCCATGCCTCTGGAATGGGAAGACACTATGGAATTGCTCTGCTTTCTGGAGTGAAGTATAAGAAGGGTGGCCT<br>TGTGATCAATGAACTGGGCTGTACT  |
| <i>FCGR3B</i>                          | NM_000570.3 | 73-173        | CCTATTCCTGTTCTATGGTGGGCTCCATTGCGAGACTTCAGATTGAGAAATCAGATGAAGTTTCAAAGAAAGG<br>AAACTGGCAGGTGACAGAGATGGGTG |
| <i>FGL2</i>                            | NM_006682.2 | 250-350       | CAATTGAGGAGTCCGAGGAGTGTTCAAAAGTCCAAAACCTCAAGGAAATCGTAAATAGTCTAAAGAAATC<br>TTGCCAAGACTGCAAGCTGCAGGCTG    |
| <i>FLT1</i>                            | NM_002019.2 | 5615-<br>5715 | TTCAACTGCTTTGAAACTTCCCTGGGGTCTGAGCATGATGGGAATAGGAGACAGGTTAGGAAAGGGCGCTA<br>CTCTTCAGGGTCTAAGATCAAGTGGG   |
| <i>FLT3LG</i>                          | NM_001459.2 | 927-<br>1027  | CCTCCCAGAAATGGAGGCAAGCCAGAATCCAGCACCGGCCCATTTACCAACTCTGTACAAAGCCCTTGTG<br>CCCATGAAATTGTATATAAATCATCT    |
| <i>FOS</i>                             | NM_005252.2 | 1475-<br>1575 | ACTCAAGTCTTACCTTCCGGAGATGTAGCAAAACGCATGGAGTGTGATTGTTCCAGTGACACTTCAGAG<br>AGCTGGTAGTGTAGTACATGTTGAGC     |
| <i>FOXO1</i>                           | NM_002015.3 | 1526-<br>1626 | TCTCATCAACATCATTAACTGTTTCGACCCAGTCTCACCTGGCACCATGATGCAGCAGACCGCTGCTAC<br>TCGTTTGGCCACCAACACCAAGTT       |
| <i>FOXO3</i>                           | NM_001455.2 | 1860-<br>1960 | CCGGAACGTGATGCTTCGCAATGATCCGATGATGCTTTGCTGCCAGCCTAACAGGGAAGTTGGTCAATC<br>AGAACTTGCTCCACCACCAAGCAAA      |
| <i>FOXP1</i>                           | NM_032682.5 | 6758-<br>6858 | CCTGAAAATCAGATTTACAATGCTGAAGGCATTTCTGGGCCAGTGTAGCTCAGCAATCTCTGTACCCATAA<br>GCCTTGATGAAGATGATACAGTCCG    |
| <i>FOXP3</i>                           | NM_014009.3 | 1230-<br>1330 | GGGCATCCTGGAGGCTCCAGAGAAGCAGCGGCACTCAATGAGATCTACCCTGGTTCACACGCATGTTTGC<br>CTTCTCAGAAACATCCTGCCACCTG     |
| <i>FYN</i>                             | NM_002037.3 | 765-865       | GTCTTTGGAGGTGTAACCTTCTGCTCATACGGGACCTTGCCTACGAGAGGAGGAAACAGGAGTGACACTCT<br>TTGTGGCCCTTTATGACTATGAAGCAC  |
| <i>FZD1</i>                            | NM_003505.1 | 2430-<br>2530 | GTGCCAATCCTGACATCTCGAGGTTTCTCACTAGACAACTCTTTTCGAGGCTCCTTTGAACAACCTCAGCTC<br>CTGCAAAGCTTCCGTCCCTGAGGCA   |
| <i>G6PD</i>                            | NM_000402.2 | 1155-<br>1255 | ACAACATCGCCTGCGTTATCCTCACCTTCAAGGAGCCCTTGGCACTGAGGGTCCGGGGGCTATTTTCGATGA<br>ATTTGGGATCATCCGGGACGTGATGCA |
| <i>GABPA</i>                           | NM_002040.3 | 1160-<br>1260 | GACCAAGTCTGCAATTTGGTGGTTTGGGTAATGAAGGAATTCAGATGACCGATATAGACCTCACCACTCAA<br>CATTTCGGGGAGAGAATTATGTAGTC   |
| <i>GADD45A</i>                         | NM_001924.2 | 865-965       | GTTACTCCCTACACTGATGCAAGGATTACAGAACTGATGCCAAGGGGCTGAGTGAATCAACTACATGTTCTG<br>GGGGCCCGGAGATAGATGACTTTGCA  |
| <i>GADD45B</i>                         | NM_015675.2 | 365-465       | TGTGGACCCAGACAGCGTGGTCTCTGCTCTTGGCCATTGACGAGGAGGAGGAGTATGATCGCCCTGCA<br>AATCCACTTACGCTCATCCAGTCTTC      |
| <i>GAL3ST4</i>                         | NM_024637.4 | 1140-<br>1240 | CGAGCCAAACCTCAATCCAATGCCCTCATCCATCCTGTTCCACTGTTACTGATCATCGCAGCCAGATATCA<br>AGCCCTGCCTCTTTCGATTGGGGT     |
| <i>GAS2</i>                            | NM_005256.3 | 915-<br>1015  | GATCTCCGTTGTGGATGGCAAAACATCCCTATCAAAGCAAATCTCCAACCTTAAAGGACATGAATCCAGATA<br>ACTACTTGGTGGTCTCTGCCAGTTAT  |

|                              |                |           |                                                                                                           |
|------------------------------|----------------|-----------|-----------------------------------------------------------------------------------------------------------|
| <i>GATA2</i>                 | NM_032638.3    | 1495-1595 | GAAGAAGGAAGGGATCCAGACTCGGAACCGGAAGATGTCCAACAAGTCCAAGAAGAGCAAGAAAGGGGCGGA<br>GTGCTTCGAGGAGCTGTCAAAGTGCATG  |
| <i>GATA3</i>                 | NM_001002295.1 | 2835-2935 | AAGAGTCCGCGGCATCTGTCTTGCCTATTCTGCAGCCTGTGCTGAGGGTAGCAGTGTATGAGCTACCAG<br>CGTGCATGTGAGCGACCCTGGCCCGAC      |
| <i>gBAD-1R-scfv</i>          | SCFV001.1      | 1-101     | AGACAGACACCCTGCTCCTCTGGGTGTCGGCACCTGTGGCGACATCGTATGAGCAGAAGCCCCAGCAGCC<br>TGGCCGTGTCCTGGGCGAGAAAGTGAC     |
| <i>GEMIN2</i>                | NM_001009182.1 | 537-637   | ACAAGCAACAGTAAGTAGTGTCTTGGAAATATCTGAGTAATTGGTTGGAGAAAGAGACTTTACTCCAGAATTGGG<br>AAGATGGCTTTATGCTTTATTGGCT  |
| <i>GFI1</i>                  | NM_005263.2    | 2235-2335 | TCATCACTGGAGGTAAGCACAAGCAATGCCTGTGGACAAGATGTCATTACTCAGCAAAATGTTTCATGG<br>ATCACCAGGCTACCAAGGTACCAGGCA      |
| <i>GLIPR1</i>                | NM_006851.2    | 255-355   | CTGCGTTGCAATCCATAACAAGTCCGATCAGAGGTGAAACCAACAGCCAGTGATATGCTATACATGACTTGGG<br>ACCCAGCACTAGCCAAATGCAAAA     |
| <i>GLO1</i>                  | NM_006708.1    | 1240-1340 | GAAATGATATGGTACCCAGACACTGGGCTAGGCTGCAACTTTATCTATTAATACTCCAGCTGTCATGTGA<br>GAAAGAAAGCAGGCTAGGCAATGTGAA     |
| <i>GNLY</i>                  | NM_006433.2    | 305-405   | CAGGAGCTGGCCGTGACTCAGGACCTGTCTGACGATAGTCCAAAACTGAAGAAGATGGTGGATAAGCCCA<br>CCCAGAGAAGTGTTCCTAATGCTCCGA     |
| <i>GSK3B</i>                 | NM_002093.2    | 925-1025  | ACTGATTACCTCTAGTATAGATGTATGGTCTGCTGGCTGTGTGGTGGTACTGTTACTAGGACAACCAATA<br>TTCCAGGGGATAGTGGTGGGATC         |
| <i>GZMA</i>                  | NM_006144.2    | 155-255   | AGACCCTCAATGGTCTACTAGTCTTGACAGAAAAACCATCTGTGCTGGGGCTTTGATTGCAAAAGACTGGGT<br>GTTGACTGCAGCTCACTGTAACCTGA    |
| <i>GZMB</i>                  | NM_004131.3    | 540-640   | ACACTACAAGAGGTGAAGATGACAGTGCAGGAAGATCGAAAGTGCAGTCTGACTTACGCCATTATTACGACAG<br>TACCATTGAGTTGTGCGTGGGGGACC   |
| <i>GZMH</i>                  | NM_033423.3    | 705-805   | AAAAAGGGACACCTCCAGAGCTTACATCAAGGTCTCACACTTCTGCCCTGGATAAAGAGAACAAATGAAGCG<br>CCTTAACAGCAGGCATGAGACTAAC     |
| <i>HCST</i>                  | NM_001007469.1 | 132-232   | ATCCTCTTCTGCTTTTGTCTCCAGTGGCTGCAGCTCAGCAGCTCCAGGAGAGATCATCACTCCCTGCCTT<br>TTACCTGGCACTTCCAGGCTCTTGT       |
| <i>HDAC1</i>                 | NM_004964.2    | 785-885   | CAAGCCGGTCATGTCCAAAGTAATGGAGATGTTCCAGCCTAGTCCGGTGGTCTTACAGTGTGGCTCAGACTCC<br>CTATCTGGGGATCGGTTAGGTTGCTC   |
| <i>HDAC2</i>                 | NM_001527.1    | 930-1030  | AAGCCTATTATCTCAAAGGTGATGGAGATGTATCAACCTAGTGTGTTGATTACAGTGTGGTGCAGACTCATA<br>TCTGGTGATAGACTGGGTTGTTCA      |
| <i>HER2-scfv</i>             | SCFV014.1      | 64-164    | CCTGCAGCCGACAGCAGCAGCTGCTACATGCAGTGTATCAGCAGAAGTCCGGCACTAGCCCCAAGCGGT<br>GGATCTACGACACCTACAGCTCGCCAG      |
| <i>HERV-K<br/>6H5-scfv</i>   | SCFV012.1      | 137-237   | CGGGCCAGCAGCTACAACAGAAAGTCAAGGACAAGCCATCCTGACCGTGGACAAGAGCAGCAGCACCAGC<br>CTACATGGAAGTCCGAGCCTGACCAGC     |
| <i>HLA-A</i>                 | NM_002116.5    | 1000-1100 | GGAAGAGCTCAGATGAAAAGGAGGGAGTTACACTCAGGCTGCAAGCAGTGACAGTCCCAGGGCTCTGATGT<br>GTCCCTCACAGCTTGTAAAGTGTGAGA    |
| <i>HMGB2</i>                 | NM_001130688.1 | 125-225   | CTGTCAACATGGTAAAGGAGACCCCAACAAGCCGCGGGGCAAAATGCTCTGTCAGCCTTCTTCGTGCAGAC<br>CTGCCGGGAAGAGCACAAAGAAACA      |
| <i>HOPX</i>                  | NM_001145460.1 | 1117-1217 | AACAATAGGAAGCTATGTGTATCTTCTGTGTAAGCAGTGGCTTCACTGGAAAAATGGTGTGGCTAGCATTCC<br>CTTTGAGTCATGATGACAGATGGTGT    |
| <i>HOXA10</i>                | NM_018951.3    | 1503-1603 | TTCTATAGAGATAGATATTGTCTAAGTGTCAAGTCTGACTGGGCTGGGTTTGTGTCTTGGGGTCCCCTGC<br>TCGAAATGGCCCTGTCTTCGCGCCA       |
| <i>HOXA9</i>                 | NM_152739.3    | 1015-1115 | GGCTCTAAACCTCAGGCCACATCTTTTCCAAGGCAAACCTGTTGAGGCTGGCTCGTAGGCTGCCGCTTGTAT<br>GGAGGAGGATTTGTAAGCTTTCATT     |
| <i>HOXB3</i>                 | NM_002146.4    | 60-160    | TGTCCGTTTAAATGCTGTGGGAGACTCGTAAAAAATCATCGTGGACCTGGAGGATGAGAGGGGCGAGCTTT<br>ATTCGTCGGATTGCGGTGTGGTGGT      |
| <i>HOXB4</i>                 | NM_024015.4    | 1340-1440 | CCTTTCTTTGCCCACTCCGACATCCAGCAGAAAGCACCCTCTGACTGCCAGATAGTGCAGTGTGGTGGTCA<br>CGGTAACACACACACACTCTCCCTCA     |
| <i>HPRT1</i>                 | NM_000194.1    | 240-340   | TGTGATGAAGGAGATGGGAGGCATCACATTGTAGCCCTCTGTGTCTCAAGGGGGCTATAAATCTTTGCTG<br>ACCTGCTGGATTACATCAAAGCACTG      |
| <i>HRH1</i>                  | NM_000861.2    | 3055-3155 | GTGGCAGCTCAAATGATATGTTTGTAGTAGACAAACAGCTGACATGGAGTCCCGTGCACCTACGGAAGGGGA<br>CGCTTTGAAGGAACCAAGTGCATTTT    |
| <i>HRH2</i>                  | NM_022304.1    | 600-700   | GCGGTCTCATCTCATCACCTGTTGCTGGCAATGTGGTGTGTCTGTGCGCTGGCCGTGGCTTGAACCCCGGCTCC<br>GCAACCTGACCAATTGTTTCATCGTGT |
| <i>Human CD19R-<br/>scfv</i> | SCFV009.1      | 215-315   | CTTCACCATCAGCAGCTGCAGCCGAGGACATGCCACCTACTACTGCCAGCAGTACCAGAGCCTGCCCTAC<br>ACCTTCGGCCAGGGCACCAAGTGCAG      |
| <i>ICOS</i>                  | NM_012092.2    | 640-740   | AACTCTGGCACCCAGGCATGAAGCAGTGGCCAGTTTTCTCAACTGAAGTGAAGATTCTTTATTTCCGG<br>GACCACGGAGAGTCTGACTTAACTAC        |
| <i>ICOSLG</i>                | NM_015259.4    | 1190-1290 | CTGCTGGCGTTGGCTGTGATCCTGGAATGAGGCCCTTTCAAAGCGTCATCCACACCAAGGCAAAATGTCCC<br>AAGTGAAGTGGGCTCCCGCTGCACTG     |
| <i>ID2</i>                   | NM_002166.4    | 505-605   | CGGATATCAGCATCTGTCTTGCAGGCTTCTGAATCCCTTCTGAGTTAATGTCAAATGACAGCAAAGCACTGT<br>GTGGCTGAATAAGCGGTGTTTCATGA    |
| <i>ID3</i>                   | NM_002167.3    | 195-295   | AGGAAGCCTGTTTGCATTTAAGCGGGCTGTGAACGCCAGGGCCGGCGGGGAGGGCCAGGGCGGCCA<br>TTTTGAATAAAGAGCGCTGCCCTCCAGGC       |
| <i>IDO1</i>                  | NM_002164.3    | 50-150    | CTATTATAAGATGCTGTGAAAACCTTTCAGACACTGAGGGGACCAGAGGAGCAGACTACAAGAATGGCACACG<br>CTATGAAAACCTCTGGACAATCAGT    |
| <i>IFNA1</i>                 | NM_024013.1    | 585-685   | ATCCCTCTCTTTATCAACAACCTTGAAGAAAGATTAAAGGAGGAAGGAATAACATCTGGTCCAACATGAAAACA<br>TTCTTATTGACTCATACACCAGGTC   |
| <i>IFNG</i>                  | NM_000619.2    | 970-1070  | ATACTATCCAGTACTGCGGTTTGAATAATGCCTGCAATCTGAGCCAGTGTCTTAAATGGCATGTCAGACAGAA<br>CTTGAATGTGTCAGGTGACCCGTGAT   |

|                |                |           |                                                                                                           |
|----------------|----------------|-----------|-----------------------------------------------------------------------------------------------------------|
| <i>IFNGR1</i>  | NM_000416.1    | 1140-1240 | CCCGGGCAGCCATCTGACTCCAATAGAGAGAGAGAGTTCTTACCTTTAAGTAGTAACCAGTCTGAACCTGGCA<br>GCATCGCTTAAACTCGTATCACTCC    |
| <i>IGF1R</i>   | NM_000875.2    | 455-555   | TCGGGGGGCCATCAGGATTGAGAAAATGCTGACCTCTGTACCTCTCCACTGTGGACTGGTCCCTGATCCTG<br>GATGCGGTGTCCAATAACTACATTGTG    |
| <i>IKZF1</i>   | NM_006060.3    | 4485-4585 | CCGCTGTGTACTACTGTGTGCCTAGATTCCATGCACCTCTCGTGTGTTGAAGTAATATTGGAGACCGGAGGG<br>TAACAGGTGGCCTGTTGATTACAGC     |
| <i>IKZF2</i>   | NM_001079526.1 | 945-1045  | CCATGTACCTCCTATGGAAGATTGTAAGGAACAAGAGCCTATTATGGACAACAATATTTCTCTGGTGCCTTTTGA<br>GAGACCTGTGTATAGAGAAGCTC    |
| <i>IL10</i>    | NM_000572.2    | 230-330   | AAGGATCAGCTGGACAACCTGTTGTTAAAGGAGTCTTCTGCTGGAGGACTTTAAGGGTTACTGGGTTGCCAAGC<br>CTTGTCTGAGATGATCCAGTTTATCC  |
| <i>IL10RA</i>  | NM_001558.2    | 150-250   | TGCCAGCCCTCGTCTGTGTGGTTGAAGCAGAATTTTCCACCACATCTCCACTGGACACCCATCCCAAAT<br>CAGTCTGAAAGTACCTGCATGAAGT        |
| <i>IL12A</i>   | NM_000882.2    | 775-875   | CTTTCTAGATCAAAACATGCTGGCAGTTATTGATGAGCTGATGCAGGCCCTGAATTTCAACAGTGAGACTGTGC<br>CACAAAAATCCTCCCTTGAAGAACCG  |
| <i>IL12B</i>   | NM_002187.2    | 1435-1535 | GCAAGGCTGCAAGTACATGATTTTATGACAATCAGGAAGAATGCAGTGTCTGATACCAGTGCCATCATACAC<br>TTGTGATGGATGGGAACCAAGAGAT     |
| <i>IL12RB1</i> | NM_005535.1    | 1292-1392 | AGGAAAAGTGTACTACATTACCATCTTTCCTCTGCGCACCCCGAGAAGCTCACCTTGTGGTCTACGGTCTCG<br>TCCACCTACCACCTTTGGGGCAATGC    |
| <i>IL12RB2</i> | NM_001559.2    | 1315-1415 | CCTCCGTGGGACATTAGAATCAAATTTCAAAGGCTTCTGTGAGCAGATGTACCCTTTATTGGAGAGATGAGGG<br>ACTGGTACTGCTTAATCGACTCAGAT   |
| <i>IL13</i>    | NM_002188.2    | 516-616   | TTTCTTCTGATGTCAAAAATGCTTGGGTAGCGGGAAGGAGGGTTAGGGAGGGTAAAATTCCTTAGCTTAG<br>ACCTCAGCCTGTGCTGCCCGTCTTCA      |
| <i>IL15</i>    | NM_172174.1    | 1685-1785 | AGGGTGATAGTCAAATTTATGTTGGTGGGGCTGGGTACCAATGCTGCAGGTCAACAGCTATGCTGGTAGGCT<br>CCTGCCAGTGTGGAACCACTACTACT    |
| <i>IL15RA</i>  | NM_002189.2    | 39-139    | CGCTCGCCCGGGAGTCCAGCGGTGCTCTGTGGAGTCCGCCATGGCCCCGGCGGGCGCGCGGCTGC<br>CGGACCTCGGTCTCCCGCGCTGCTACTG         |
| <i>IL17A</i>   | NM_002190.2    | 240-340   | TACTACAACCGATCCACCTCACCTTGGAAATCTCCACCGAATGAGGACCTGAGAGATATCCCTCTGTGATCTG<br>GGAGGCAAAAGTCCCGCACTGGGCT    |
| <i>IL17F</i>   | NM_052872.3    | 210-310   | GCCCGCCTGTGCCAGGAGTATGATGAAGCTTGACATTGGCATCATCAATGAAAACAGCGCGTTCCATGTCA<br>CGTAACATCGAGAGCCGCTCCACCTC     |
| <i>IL17RA</i>  | NM_014339.4    | 3020-3120 | CTACTATGTGGCGGCAATTTGGGATACCAAGATAAATTCATGCGGCATGGCCCCAGCCATGAAGAACTTAA<br>CCGCTAGTCCCGAGGACAGCTTAAACG    |
| <i>IL18</i>    | NM_001562.2    | 48-148    | GACAGTCAGCAAGGAATTGTCTCCAGTGCATTTTCCCTCCTGGCTGCCAACTCTGGCTGCTAAAGCGGCTG<br>CCACCTGCTGCAGTCTACACAGCTTCC    |
| <i>IL18R1</i>  | NM_003855.2    | 2025-2125 | GAATGAGGGGATTTAAGTGTCTGAAGAGGCATTTCTAGGACCAGTGGGTGACTGAGTAAGTAAATGCTGC<br>TTTCACTCCCTAACACCATGGATCTG      |
| <i>IL18RAP</i> | NM_003853.2    | 2412-2512 | GCTTGATGGACAATGGAGTGGGATTGAGACTGTGGTTTAGAGCCTTTGATTTCTGGACTGGACTGACGGCGA<br>GTGAATTTCTAGACCTTGGGTACTTT    |
| <i>IL1A</i>    | NM_000575.3    | 1085-1185 | ACTCCATGAAGGCTGCATGGATCAATCTGTGTCTCTGAGTATCTCTGAAACCTCTAAAACATCCAAGCTTACCTT<br>CAAGGAGAGCATGGTGTAGTAGCA   |
| <i>IL1B</i>    | NM_000576.2    | 840-940   | GGGACCAAAGCGCGCAGGATATAACTGACTTCACCATGCAATTTGTGCTTCTTAAGAGAGCTGTACCCAGA<br>GAGTCTGTGCTGAATGTGGACTCAA      |
| <i>IL2</i>     | NM_000586.2    | 300-400   | AGGATGCAACTCCTGTCTTGCATTGCACCTAAGTCTTGCACTTGTACAAACAGTGCACCTACTTCAAGTTCTACA<br>AAGAAAACACAGCTACAACCTGGAGC |
| <i>IL21R</i>   | NM_021798.2    | 2080-2180 | CGTGTGTTGGTCAACAGATGACAACAGCCGCTCCTCCTCCTAGGCTTGTGTTGCAAGTTGGTCCACAGCAT<br>CTCCGGGGCTTTGTGGATCAGGGCA      |
| <i>IL22</i>    | NM_020525.4    | 319-419   | CTATCTGATGAAGCAGGTGCTGAACCTCACCTTGAAGAAGTGTGTTCCCTCAATCTGATAGGTTCCAGCCTT<br>ATATGCAGGAGGTGGTGCCTTCTCTG    |
| <i>IL23A</i>   | NM_016584.2    | 411-511   | CAGGACAACAGTCAGTTCTGTTGCAAAAGGATCCACCAGGCTGATTTTTATGAGAAGTGTGATGATCGG<br>ATATTTTACAGGGGAGCCTTCTCTG        |
| <i>IL23R</i>   | NM_144701.2    | 710-810   | AACTGCAAATTCACCTGGATGATATAGTACCTTCTGCAGCCGCTATTCCAGGGCTGAGACTATAAATGCTA<br>CAGTGCCCAAAGACCATAATTTATTG     |
| <i>IL27</i>    | NM_145659.3    | 143-243   | CAGGAGCTGCGGAGGGAGTTCACAGTCAGCCTGCATCTGCCAGGAAGCTGCTCCTCAGGTTCCGGGGCCAG<br>GCCACCCGCTTTGCGGAATCTCACCTGC   |
| <i>IL2RA</i>   | NM_000417.1    | 1000-1100 | CTTGGTAAGAAGCCGGGAACAGACAAGCAAGTCAAGAGCCCAAGTAAATCAAAGGTGCTAAATGGTCCGCC<br>CAGGAGACATCCGTTGTGCTTCCCTGC    |
| <i>IL2RB</i>   | NM_000878.2    | 1980-2080 | GTCCTGTGCCGAGCCAGGAAGTGTGTGTGTCAGGGGGCAGTAACCTCCCACTCCCTGTTAATCACA<br>GGATCCACGAATTTAGGCTCAGAAGC          |
| <i>IL2RG</i>   | NM_000206.1    | 595-695   | CCACAGCTGACTGAACATCAGTGGATTATAGACATAAGTCTCCTTGCCTAGTGTGGATGGGAGAAACGCT<br>ACAGTTTTCTGTTCCGAGCCGCTTT       |
| <i>IL4</i>     | NM_000589.2    | 625-725   | GACACTCGCTGCCTGGGTGCGACTGCACAGCAGTCCACAGGCACAAGCAGCTGATCCGATTCTGAAACGGC<br>TCGACAGAACTCTGGGGCTGGCGG       |
| <i>IL4R</i>    | NM_000418.2    | 705-805   | ATCATCTCACCTATGCAGTCAACATTTGGAGTGAACAGCCCGCAGATTTCAAGTCTATAACGTGACCTACC<br>TAGAACCTCCTCCGATCCGAGC         |
| <i>IL5</i>     | NM_000879.2    | 105-205   | CCACAGAAATCCACAAGTGCATTGGTGAAGAGACCTTGGCACTGCTTTCTACTCATGAACTCTGCTGATA<br>GCCAATGAGACTCTGAGGATTCCTGT      |
| <i>IL6</i>     | NM_000600.1    | 220-320   | TGACAACAATTCGGTACATCCTCGACCGCATCTCAGCCCTGAGAAAGGAGACATGTAACAAGAGTAACATGT<br>GTGAAAGCAGCAAAGAGGCACTGGCA    |
| <i>IL6R</i>    | NM_000565.2    | 993-1093  | CTTTCTACATAGTGCATGTGCGTCCAGTAGTGTCCGGAGCAAGTTCAGCAAACTCAAACCTTTCAGGGT<br>TGTGGAATCTTGACGCTGATCCCGC        |

|                 |                |           |                                                                                                          |
|-----------------|----------------|-----------|----------------------------------------------------------------------------------------------------------|
| <i>IL7R</i>     | NM_002185.2    | 1610-1710 | TTGCTTGACCACTCTTCTGAGTTCAGTGGCACTCAACATGAGTCAAGAGCATCCTGCTTCTACCATGTGGATT<br>TGGTCAACAGGTTTAAAGGTGACCCA  |
| <i>IL9</i>      | NM_000590.1    | 300-400   | AAGTACTAAAGAACAACAAGTGTCCATATTTTTCTGTGAACAGCCATGCAACCAAAACCACGGCAGGCAACGCG<br>CTGACATTTCTGAAGAGTCTTCTGGA |
| <i>IRF1</i>     | NM_002198.1    | 510-610   | CTGTGCCAGTGTACCCGGATGCTTCCACCTCTCACCAGAACCAGAGAAAAGAAAGTGAAGTCCAGCCG<br>AGATGCTAAGAGCAAGGCCAAGAGGAA      |
| <i>IRF2</i>     | NM_002199.2    | 1375-1475 | CAGTACTGGAGCTTCTTTAACTCAGGACTCCAGCCATTGGTAGACGTGTGTTTCTAGAGCCTGCTGGATC<br>TCCAGGGCTACTCACTCAAGTTCAA      |
| <i>IRF4</i>     | NM_002460.1    | 325-425   | GGGCACTGTTAAAGGAAAGTCCGAGAAAGGCATCGACAAGCCGGACCCTCCACCTGGAAGACGCGCCTGC<br>GGTGCCTTTGAACAAGAGCAATGACTT    |
| <i>ITCH</i>     | NM_031483.4    | 155-255   | ACTGTGAGAACTTCAGTTTTCCAACTATTGGTGGTATGTCTGACAGTGGATCACAACCTGGTTCAATGGTA<br>GCCTCACCATGAAATCACAGCTTCCAG   |
| <i>ITGA1</i>    | NM_181501.1    | 1875-1975 | AAGTGGCAAGACTATAAGGAAAGAGTATGCACAACGTATTCATCAGGTGGGGATGGTAAGACACTGAAATTT<br>TTGGCCAGTCTATCCACGGAGAAATG   |
| <i>ITGA4</i>    | NM_000885.4    | 975-1075  | GCCACTGCCAACTGGCTCGCCAACGCTTCACTGATCAATCCCGGGCGATTACAGATGCAGGATCGGAAAG<br>AATCCCGGCCAGACGTGCGAACAAGCTC   |
| <i>ITGA5</i>    | NM_002205.2    | 925-1025  | AGAAGACTTTGTGCTGGTGTGCCAAAGGAACTCACTACGGCTATGTACCATCCTTAATGGCTCAGACA<br>TTGATCCCTCTACAACTTCTCAGGG        |
| <i>ITGAL</i>    | NM_002209.2    | 3905-4005 | GTGAGGGCTGTGCTTACCAGAGCTTACCAGCCTCTTGGTTTCTTCTTGAAGAGAATGTCTGATCTA<br>AATGTGGAGAACTGTAGTCTCAGGA          |
| <i>ITGAM</i>    | NM_000632.3    | 515-615   | GCCCTCCGAGGGTGTCTCAAGAGGATAGTGACATTGCCTTCTTGATTGATGGCTCTGGTAGCATATCCACA<br>TGACTTTCGGCGGATGAAGGAGTTTG    |
| <i>ITGAX</i>    | NM_000887.3    | 700-800   | CCCCTCAGCCTGTTGGCTTCTGTTCCAGCTGCAAGGGTTTACATACACGGCCACCGCCATCCAAATGTCGT<br>GCACCGATTGTTCCATGCCTCATATG    |
| <i>ITGB1</i>    | NM_033666.2    | 2000-2100 | TTTTAACATTACCAAGTAGAAAAGTCGGGACAAATACCCAGCCGGTCCAACTGATCCTGTGTCCATTGTA<br>AGGAGAAGGATGTGACGACTGTTGG      |
| <i>ITGB7</i>    | NM_000889.1    | 1278-1378 | CAACGTGTTACAGTCTATCATGGATGCTTATAATAGCCTGTCTCCACCGTGACCCTTGAACACTCTTCACTCCC<br>TCTGGGGTCCACATTTCTTACGAA   |
| <i>ITK</i>      | NM_005546.3    | 3430-3530 | GCCAGTAAAGAAGTCAGTATAGAACCCTAGCGAATAGTGTGCTCTGGCACAGACCCTGTGGTTGATGGCAT<br>GGCCCTCCAACCTTGAATAGGATTTT    |
| <i>JAK1</i>     | NM_002227.1    | 285-385   | GAGAACCACCAAGCTCTGGTATGCTCAAATCGACCATCACCGTTGATGACAAGATGTCCTCCGGCTCCACTA<br>CCGGATGAGGTTCTATTTCAACAAT    |
| <i>JAK2</i>     | NM_004972.2    | 455-555   | CTCCTCCCGCAGCGGCAATGTTCTGAAAAAGACTCTGCATGGGAATGGCCTGCCTTACGATGACAGAAATGG<br>AGGGAACATCCACCTCTCTATATATC   |
| <i>JAK3</i>     | NM_000215.2    | 1715-1815 | GTGCTGCTGAAGTCTGGATGCCAAGCACAAGAACTGCATGGAGTCACTCTGGAAGCAGCGAGCTTGATGA<br>GCCAAGTGTGCTACCGGCATCTCGTGC    |
| <i>JUN</i>      | NM_002228.3    | 140-240   | ACACAGCCAGCCAGCCAGGTGCGCAGTATAGTCCGAACCTGCAAACTTTATTTTCTTTTACCTTCTCTAACTG<br>CCCAGAGCTAGCCCTGTGGCTCCC    |
| <i>JUNB</i>     | NM_002229.2    | 1155-1255 | GCGCGCTGGAGGACAAAGTGAAGACGCTCAAGGCCGAGAACGCGGGGCTGTGAGTACCGCCGGCTCCT<br>CCGGGAGCAGGTGGCCAGCTCAAACAGA     |
| <i>KIR2DL1</i>  | NM_014218.2    | 881-981   | GCAGGAAACAGACAGCGAATAGCGAGGACTCTGATGAACAAGACCCTCAGGAGGTGACATACACACAGTTGA<br>ATCACTGCGTTTTACACAGAGAAAAA   |
| <i>KIR2DL2</i>  | NM_014219.2    | 814-914   | TCTCCTTATCCTGGTCTCCAACAAAAAATGCTGCGGTAATGGACCAAGAGTCTGCAGGGAACAGAACAG<br>CGAATAGCGAGGACTCTGATGAACAA      |
| <i>KIR2DL3</i>  | NM_015868.2    | 741-841   | CTCCGAACCCGGTAACCCAGACACCTGCATGTTCTGATTGGACCTCAGTGGTATCATCTCTTATCCTCC<br>TCTCTTCTTCTCCTTATCGCTGG         |
| <i>KIR2DL4</i>  | NM_002255.5    | 15-115    | GCGTCTGGCAGCAGAAAGTGCACCATGTCCATGTACCCACGGTATCATCTGGCATGTCTGGTTCTTCT<br>TGGACCAGAGTGTGGGACACAGCTG        |
| <i>KIR2DL5A</i> | NM_020535.3    | 1451-1551 | GACACGTGCTGTCCACCTTCCCTCATGCTGTTACCTTCTCAGACTATTTCCAGCCTTGTGAGTACAGC<br>AGTGAACTTATAAAATTTTTGTG          |
| <i>KIR2DS1</i>  | NM_014512.1    | 698-798   | CTTACCCTGAAACCAAGCTCCGAAACCGGTAACCCAGACACCTACATGTTCTGATTGGACCTCAGTGGTC<br>AAAATCCCTTACCCTCCCTCTT         |
| <i>KIR2DS2</i>  | NM_012312.2    | 856-956   | CAAGAGCCTCAGGGAACAGAACAGTGAACAGCGAGGATTCTGATGAACAAGACCATCAGGAGGTGCATACG<br>CATAATTGGATCACTGTGTTTCCACAC   |
| <i>KIR2DS3</i>  | NM_012313.1    | 693-793   | GGCCTTACCCTGAAACCAAGCTCCAAAACCGGTAACCCAGACACCTACAGTCTGATTGGACCTCAGT<br>GGTCAAACCTCCCTTACCCTCCCTCT        |
| <i>KIR2DS4</i>  | NM_012314.3    | 1427-1527 | ACATACAAGAGGCTGCCTCTTAACACAGCACTTAGACAGTGTGTTCCACCTCCCTCAGACTATCTTTCAGC<br>CTTCTGCCAGCAGTAAACTTATAAA     |
| <i>KIR2DS5</i>  | NM_014513.2    | 204-304   | CTTCTTCTGCACAGAGGGGACGTTTAAACCACACTTTCGCTCATTGGAGAGCACATTGATGGGTCTCCA<br>AGGGCAACTTCTCCATCGGTGCGATG      |
| <i>KIR3DL1</i>  | NM_013289.2    | 1054-1154 | CAAATCTGGTAAACCCAGACACCTGCACATTCTGATTGGACCTCAGTGGTATCATCTCTTATCCTCTCTC<br>CTCTTCTTCTCTTATCTGTTG          |
| <i>KIR3DL2</i>  | NM_006737.2    | 884-984   | TGCCACCCAGGAGGACCTACAGATGCTTGGCTCTTTCGCTGCCCTGCCCTGCGTGTGGTCAAACCTCAAGT<br>GACCCACTGCTTGTGTTCTGCACAGGA   |
| <i>KIR3DL3</i>  | NM_153443.3    | 508-608   | CCTTGCCTCTGTTGACAGTCCACGATGCGGGTCCAGGTCAACTATTCATGGTCCCATGACACCTGC<br>CCTTGCAGGGACCTACAGATGCTTTGG        |
| <i>KIR3DS1</i>  | NM_001083539.1 | 1000-1100 | CTCCAACTGGTAACCTCAGACACTGCACATTCTGATTGGACCTCAGTGGTCAAATCCCTTACCATCCT<br>CCTCTTCTTCTCTTATCGCTGG           |
| <i>KIT</i>      | NM_000222.1    | 5-105     | CATCGCAGTACCAGGATGAGAGGCGCTCGCGGCGCTGGGATTTCTGCTGTTCTGCTCTACTGCTTCGC<br>GTCCAGACAGGCTTCTCAACCATCT        |

|                  |                |               |                                                                                                          |
|------------------|----------------|---------------|----------------------------------------------------------------------------------------------------------|
| <i>KLF10</i>     | NM_005655.1    | 570-670       | GCTCAGGCAACAAGTGTGATTGCTCATACAGCTGATGCCAGCTATGTAACCACCAGACCTGCCAATGAAAGC<br>AGCCAGCATCCTCAACTATCAGAACA   |
| <i>KLF2</i>      | NM_016270.2    | 1015-<br>1115 | GGAAGTTTGGCGCTCAGACGAGCTACGCGCCACTACCGAAAGCACACGGCCACCAGCCATTCCAGTGCC<br>ATCTGTGCGATCGTGCCTTCTCGCGCTC    |
| <i>KLF4</i>      | NM_004235.4    | 1980-<br>2080 | CGAGCATTITCCAGGTCCGACCACCTCGCCTTACACATGAAGAGGCATTTTTAAATCCCAGACAGTGGATATGA<br>CCCACACTGCCAGAAGAGAATTCAGT |
| <i>KLF6</i>      | NM_001008490.1 | 1165-<br>1265 | GGGATGCGTGTCCAGCCAAGCATGCCGTTCTGCACCCTACCCAGTTGCCTCCAGGGCCTCTCCTTGAAGG<br>TCTTTTGGGGCTAAAAAGGTCCTGTA     |
| <i>KLF7</i>      | NM_001270943.1 | 1546-<br>1646 | GTAATTGAGATCTTTCGCGTGCATCCCAACGGCCTTAGCGGCGGAGACTGGAATAACACCTTACACCTTTC<br>TGGCCTGCATTTCTGTAGACTTCACT    |
| <i>KLRAP1</i>    | NR_028045.1    | 414-514       | CCTTCAGAGTCACAGAATAGATTAAAGCCTGATGATACTCAAAGGCCGGGAAAAGTATGACAAAAGATTTTC<br>AGTCCCTGGCACCTCATTGCAGTGA    |
| <i>KLRB1</i>     | NM_002258.2    | 85-185        | TGAGTTAACTTACCACAGACTCAGGCCAGAAAAGTTCTTACCTTCATCTTCTCCGGGATGCTGTCAGG<br>GTTCACTTGGCATCAATTTGCCCTG        |
| <i>KLRC1</i>     | NM_002259.3    | 335-435       | ACCTATCACTGCAAGATTTACCATCAGCTCCAGAGAAGCTCATTGTTGGGATCCTGGGAATTATCTGCTTATC<br>TTAATGGCCTCTGTGGTAACGATAG   |
| <i>KLRC2</i>     | NM_002260.3    | 942-<br>1042  | TATGTGAGTCAGCTTATAGGAAGTACCAAGAACGTAACCCATGGAGACAGAAAGTAGAATAGTGGTTGCCA<br>ATGTCTCAGGGAGTTGAATAGGAG      |
| <i>KLRC3</i>     | NM_002261.2    | 760-860       | ACTCTGAGCTCAAGAAATCAACACATCTTGGCCTCCCAAGTGTGGGATTACTGACACAAGCCACCGCCCT<br>GAGTGTCTATGTACCATTAGCTTGT      |
| <i>KLRC4</i>     | NM_013431.2    | 29-129        | TTATATTGGTCAACAGCAAAATGAACATACTACTCAGCCTCCAACACATGCAGTTTGCCTATACCAGGATCCT<br>GTCAAAATATACACCACCTATAGCT   |
| <i>KLRD1</i>     | NM_002262.3    | 542-642       | AGCTGCTTTCAGCTTCAAAACACAGATGAAGTGGATTTATGAGCTCCAGTCAACAATTTACTGGATTGGACTC<br>CTTACAGTGGAGGACACCCGCT      |
| <i>KLRF1</i>     | NM_016523.1    | 275-375       | AAAAGGAAGTTGTTCAATGCCACTCAGTATGAGGACACTGGAGATCTAAAAGTGAATAATGCCACAAGAAGA<br>AATAAAGTAATAAGGACCTTTGTGC    |
| <i>KLRG1</i>     | NM_005810.3    | 45-145        | TGCTACGGCAACCAAGCCAGAATGACTATGACCACAGCAAAAATCTTCTCTCCAGGCCCTTCTTGTCT<br>TGCTTGTGGCAATAGCTTTGGGGCT        |
| <i>KLRK1</i>     | NM_007360.1    | 760-860       | GGACCAGGATTTACTTAACTGGTGAAGTCATATCATTGGATGGGACTAGTACACATTTCAACAATGGATCTTG<br>GCAGTGGGAAGATGGCTCCATTCTC   |
| <i>LAG3</i>      | NM_002286.5    | 1735-<br>1835 | CTTTTGGTACTGGAGCCTTTGGCTTTCACCTTTGGAGAAGACAGTGGCGACCAAGACGATTTTCTGCCTTAGA<br>GCAAGGGATTACCCCTCCGAGGCTC   |
| <i>LAIR1</i>     | NM_002287.3    | 1195-<br>1295 | GCACCTGAGGTAGAAAGTCACTCTAGGAAAAGCCTGAAGCAGCCATTTGGAAGGCTTCTGTTGGATTCTCT<br>TCATCTAGAAAGCCAGCCAGGCGCT     |
| <i>LAT</i>       | NM_001014987.1 | 1290-<br>1390 | TGTGTAATAGAATAAAGGCCTTGGCTGTGTCTGTTGAGCGTGCCTGTGTGTGCTGTGTGCGTGTGTCGAGT<br>CAGAGATTTGGAGATGTCTCTGTGTG    |
| <i>LAT2</i>      | NM_014146.3    | 1863-<br>1963 | TGCAGAGCTGATTAACAGTGTGTGACTGTCTCATGGAAAGAGCTGGGGCCAGAGGACCTTGAGTCAGAA<br>ATGTTGCCAGAAAAGTATCTCTCCA       |
| <i>LCK</i>       | NM_005356.2    | 1260-<br>1360 | ATTAAGTGGACAGCGCCAGAACCCATTAACACGGGACATTCACCATCAAGTCAGATGTGTGCTTTTGGGAT<br>CCTGCTGACGGAATTTGTCACCCACG    |
| <i>LDHA</i>      | NM_005566.1    | 985-<br>1085  | CAGAATGGAATCTCAGACCTTGTGAAGTGAAGTCTGACTTCTGAGGAAGAGGCCGTTTGAAGAGAGTGCAG<br>ATACACTTTGGGGATCCAAAAGGAGC    |
| <i>LEF1</i>      | NM_016269.3    | 1165-<br>1265 | CCGTACACATCCCATCAGATGTCAACTCCAACAAGGCATGTCCAGACATCCTCCAGCTCCTGATATCCCTAC<br>TTTTTATCCCTTGTCTCCGGTGGTG    |
| <i>LGALS1</i>    | NM_002305.3    | 60-160        | GGTGCCTGCCGGGAACATCTCTCGACTCAATCATGGCTTGTGGTCTGTGCGCCAGCAACCTGAATCTC<br>AAACCTGGAGAGTGCCCTCAGTGCGA       |
| <i>LGALS3</i>    | NM_002306.2    | 120-220       | CAGCCGTCGGAGCCAGCCAACGAGCGGAAAATGGCAGACAATTTTTCGCTCCATGATGCGTTATCTGGGTCT<br>GGAAACCAAAACCTCAAGGATGGCT    |
| <i>LIFR</i>      | NM_002310.3    | 2995-<br>3095 | CCTATTGTCCACCCATCATTGAGGAAGAAATACCAAAACCCAGCCAGATGAAGCTGGAGGACTGCACAGGT<br>TATTTACATTGATGTTCAAGTGCATGTA  |
| <i>LILRB1</i>    | NM_001081637.1 | 2332-<br>2432 | AGCTGAGAAAATAAGTCAAGAAAGTGCATTAACCTGAATCACAATGTAATATTACACATCAAGCGATGAACTG<br>GAAAACCTACAAGCCAGAAATGAATG  |
| <i>LOC282997</i> | NR_026932.1    | 665-765       | TGATCACATTCTACCTGGCATTATTTTCATCTGAGTCCCTGTCTAGCCCTTCTGCCATTAGACTGTAACCTTGT<br>TTAGGGAAGACCTGTGCTTACTC    |
| <i>LRP5</i>      | NM_002335.1    | 2515-<br>2615 | TGGACACCAACATGATCGAGTGTCCAACATGCTGGGTGAGGAGCGGGTCTGATTGCCAGCATCTCCCGCA<br>CCCGTTCCGGTCTGACGAGTACAGCGA    |
| <i>LRP6</i>      | NM_002336.1    | 2185-<br>2285 | CTTAGATTATCCAGAAGGCATGGCAGTAGACTGGCTTGGGAAGAACTGTACTGGCAGACACAGGAACGAAT<br>CGAATTGAGGTGTCAAAGTTGGATGGG   |
| <i>LRRC32</i>    | NM_005512.2    | 3470-<br>3570 | CACCCTGGTGGGTTCTCCTGTCTCTGTGCTTGTGCTTGTGCTTCTCATTCCCTTTTCTCTATTGAGCAGAGC<br>CTGGAGTTTGAAGTATGGAATCCA     |
| <i>LTA</i>       | NM_000595.2    | 885-985       | CTGATCAAGTCACCGAGCTTTCAAAGAAGGAATTTAGGCATCCAGGGGACACACCTCCCTGAACCATCC<br>CTGATGCTGTCTGGCTGAGGATTTCA      |
| <i>LTBR</i>      | NM_002342.1    | 1435-<br>1535 | CTAACAGGGCCCAAGGAACCAATTTATCCCCATGACTGACGGAGTCTGAGAAAAGGCAGAAGAAGGGGGG<br>CACAAAGGGCACTTCTCCCTTGAAGGCTG  |
| <i>LYN</i>       | NM_002350.1    | 1285-<br>1385 | TCCTGAAGAGCGATGAAGTGGCAAAGTGTCTTCCAAAGCTCATTGACTTTTCTGCTCAGATTGCAGAGGGA<br>ATGGCATACATCGAGCGGAAGAATA     |
| <i>MAD1L1</i>    | NM_003550.2    | 306-406       | GAAGACTGGGGAAAACCATGTTTTATCCACCTGAGATCTTTGAACAACCTCATCTCTCAGCGTGTGGA<br>GGGAGGCTCTGGACTGGATTTCTA         |
| <i>MAP2K1</i>    | NM_002755.2    | 970-<br>1070  | ACGGAATGGACAGCCAGCTCCCATGGCAATTTTGAAGTGTGGATTACATAGTCAACGAGCCTCCCAAAA<br>CTGCCAGTGGAGTGTTCAGTCTGGA       |



|                   |                |           |                                                                                                          |
|-------------------|----------------|-----------|----------------------------------------------------------------------------------------------------------|
| <i>MAPK14</i>     | NM_001315.1    | 450-550   | TGGGCTCTGGCCCTATGGCTCTGTGTGTGCTGCTTTGACACAAAAACGGGGTTACGTGTGGCAGTGAAGAA<br>GCTCTCCAGACCATTTCAGTCCATCAT   |
| <i>MAPK3</i>      | NM_002746.2    | 580-680   | AACGTGCTCCACCGAGATCTAAAGCCCTCCAACCTGCTCATCAACACCACCTGCGACCTTAAGATTGTGATTT<br>CGGCTGGCCCGGATTGCCGATCTG    |
| <i>MAPK8</i>      | NM_139049.1    | 945-1045  | TCTCTGTAGATGAAGCTCTCCAACACCCGTACATCAATGTCTGGTATGATCCTTCTGAAGCAGAAGCTCCACCA<br>CCAAAGATCCCTGACAAGCAGTTAGA |
| <i>MBD2</i>       | NM_003927.3    | 2015-2115 | ATTTACATTCAACTCTGATCCCTGGCCCTTAGGTTGACATGGAGGTGGAGGAAGATAGCGCATATATTTGCAG<br>TATGAACATTTGCCTCTGGACGTTGT  |
| <i>MCL1</i>       | NM_021960.3    | 1260-1360 | GCTGTAACCTCCTAGAGTTGCACCTTAGCAACCTAGCCAGAAAAGCAAGTGGCAAGAGATTATGGCTAACAAAG<br>AATAAATACATGGGAAGAGTCTCC   |
| <i>MIF</i>        | NM_002415.1    | 319-419   | TCCTACAGCAAGCTGCTGTGCGGCTGTGGCCGAGCGCCTGCGCATCAGCCCGGACAGGGTCTACATCAAC<br>TATTACGACATGAACGCGGCAATGTTG    |
| <i>MMP14</i>      | NM_004995.2    | 1470-1570 | GACAAGATTGATGCTGCTCTTTCTGGATGCCAATGAAAAGACCTACTTCTCCGTGAAAACAAGTACTACCG<br>TTTCAACGAAGAGCTCAGGGCAGTGG    |
| <i>MPL</i>        | NM_005373.2    | 895-995   | CAGTGGCCTTGACTGCAATGCTTTACCTTGACCTGAAGAATGTTACCTGTCAATGGCAGCAACAGGACCAT<br>GCTAGCTCCCAAGGCTTCTTCTACCA    |
| <i>MTOR</i>       | NM_004958.2    | 5095-5195 | TTAGTGTGCTCTGGGAGTTGATCCGTCTCGGCACTTGACCATCTCTGCCAACAGTTCACCTCAGGTGAC<br>CTATGCCTACATGAAAACATGTGGA       |
| <i>MXD1</i>       | NM_002357.2    | 880-980   | GAGAATAAGCTGCAGACAGTCAAGGCGTGTCTGGTCTCTAAGAGAGTGGGCACTGCGGCTGTCTCTT<br>GAAGGTTCTCCCTGTTGTTCTGATTA        |
| <i>MYB</i>        | NM_005375.2    | 3145-3245 | AACGTGTCATGGATCCTGTGTTTGCACCTGGGAGACAGAAACTGTGGTTGATAGCCAGTCACTGCCTTAAGA<br>ACATTTGATGCAAGATGGCCAGCACT   |
| <i>MYC</i>        | NM_002467.3    | 1610-1710 | TCGGACACCGAGGAGAATGCAAGAGCGCAACACACAACGCTTTGGAGCGCCAGAGGAGAACGAGCTAAAA<br>CGGAGCTTTTTGCCCTCGCTGACCAGA    |
| <i>MYO6</i>       | NM_004999.3    | 6655-6755 | AAGTTGGGAGATGGCACCTTCTCAGAGGATGTGAAAATATGAGGAAGAAAACAAACAGTGCATGTAGGAGC<br>ACAGGGCCACACAAGGCATTTCTATTG   |
| <i>NANOG</i>      | NM_024865.2    | 1100-1200 | CTACTCCATGAACATGCAACCTGAAGACGTGTAAGATGAGTAAACTGATATTACTCAATTTCACTGTGGACAC<br>TGGCTGAATCCTCTCTCCCTCC      |
| <i>NBEA</i>       | NM_015678.3    | 8645-8745 | CTGAGAGCCCTTGAAGGACCAGAAAAGTCTTATCCACGCTTGATATCTGTCTCCAGCGAAGGCCACTGTAT<br>CATATACTATGAACGAGGGCGATTCA    |
| <i>NCAM1</i>      | NM_000615.5    | 1620-1720 | GGTATTTGCCTATCCAGTGCACGATCTCATGGTTTCGGGATGGCCAGCTGCTGCCAAGCTCCAATTACAGCA<br>ATATCAAGATCTACAACACCCCTCT    |
| <i>NCL</i>        | NM_005381.2    | 1492-1592 | GAACAGAGATCGATGGCGATCTATTTCCCTGTACTACTGGAGAGAAAAGTCAAATCAAGCATATAGAGGT<br>GGAAGAATAGCACTTGGAGTGGTGA      |
| <i>NCR1</i>       | NM_001145457.1 | 145-245   | TTTTATGTTCCAAAGGAAAAGCAAGTGACCATCTGTTGCCAGGAAAATTATGGGGCTGTTGAATACCAGCTGC<br>ACTTTGAAGGAAGCCTTTTTGCCGTG  |
| <i>NCR2</i>       | NM_004828.3    | 798-898   | CTTCAACAGGTCACGGACCTTCCCTGGACCTCAGTTTCTCACCTGTAGAGAGAGAAATATTATATCACACTGTT<br>GCAAGGACTAAGATAAGCGATGATG  |
| <i>NCR3</i>       | NM_147130.1    | 50-150    | GCATCTGCTCTCTCTCCTCAGGAGGCAAGCATTGATGCTCGAGTCCCTGGCAGTTGTGGCTTGGCAAG<br>TGATGTGTGAGTCCCGTGTGTCATAGG      |
| <i>NCRNA00185</i> | NR_001544.2    | 143-243   | GAGGCTGTCTGCCAACATCTTTCATCACTCTGCTGCAACTATGAAAAATTTAGTTCTAAAAATGCAACCTTGC<br>TAAATTGAGTACTAATAGGATGGT    |
| <i>NEIL1</i>      | NM_024608.2    | 1675-1775 | TTAGCAGGAGGCTCTCCTTCTGCACTCACCTTTCTATTGTCTTGCCTGCATCTGGGGTCTGAATTTTTG<br>GGAGCAGGCAATATCTGAAGGTGCA       |
| <i>NEIL2</i>      | NM_145043.2    | 2570-2670 | GCCCGGTGGTGTGATGAGAAAAGCTGCTTGTACTCCTTAAGTCAATGATTGGTACTGTTGATTTGTTGAAC<br>AATTCAGGAATCAAGGGCTGTGGAG     |
| <i>NFAT5</i>      | NM_173214.1    | 3290-3390 | CCCTGACAATTTCAAACCCAGGACATCTCACAGCCTGGTACTTTCCAGCAGTTTCTGCTTCTAGTCAGCTGC<br>CCAACAGCGATGCACTATTGACGCA    |
| <i>NFATC1</i>     | NM_172390.1    | 2510-2610 | CCAGTACCAGCGTTTACCTACCTTCCCGCAACGGTAACGCCATCTTTCTAACCGTAAGCCGTGAACATGAGC<br>GCGTGGGGTGCTTTTCTAAAGACGC    |
| <i>NFATC2</i>     | NM_012340.3    | 1815-1915 | GACGGACATTGGAAGAAAGAACACGCGGGTGAGACTGGTTTTCCGAGTTCACATCCAGAGTCCAGTGGCAGA<br>ATCGTCTCTTTACAGACTGCATCTAAC  |
| <i>NFATC3</i>     | NM_004555.2    | 2190-2290 | GTCCTTGAAGTTCCTCCATATCATAACCCAGCAGTTACAGTGCAGTGCAGTGCACCTTTATCTTTGCAATGGC<br>AAGAGGAAAAAAGCCAGTCTCAAC    |
| <i>NFKB1</i>      | NM_001165412.1 | 2305-2405 | CTTGGTAACTCTGTTTTGCACCTAGCTGCCAAGAAGGACATGATAAAGTTCTCAGTATCTTACTCAAGCACA<br>AAAGGCAGCACTACTCTTGACCAC     |
| <i>NOS2</i>       | NM_000625.4    | 605-705   | TTGCCTGGGTCCATTATGACTCCAAAAGTTTGACCAGAGACCAGGACAAGCCTACCCCTCCAGATGAG<br>CTTCTACCTCAAGCTATCGAATTTGTC      |
| <i>NOTCH1</i>     | NM_017617.3    | 735-835   | CTGCCAGGCTTCAACGGCCAGAAGTGTGAGAAAATATCGACGATTGTCCAGGAAACAAGTCAAGAACGGGG<br>GTGCGCTGTGGACGCGTGAACACCT     |
| <i>NR3C1</i>      | NM_001018077.1 | 1665-1765 | GCTTTCTCTCTGGCGGGAGAAGCAGTTCATTCTTTTGAAGAAAAGTCAATGAGGACTGCAAGCCTCTCA<br>TTTTACCGGACACTAAACCCAAAAT       |
| <i>NR4A1</i>      | NM_002135.3    | 155-255   | CGGCCGGTAGGGTGCAGCCTGAGGCTTGTTCAGCAGAACAGGTGCAAGCCACATTGTTGCCAAGACCTGCC<br>TGAAGCCGATTCTCCCACTGCCTCT     |
| <i>NREP</i>       | NM_001142474.1 | 990-1090  | AAACTATTGTTCTTGTGGTAAGTGACCAGATGCTGCCACAGGACCTGAGACACTGATGAATGGTCTATT<br>TTGGACTTTCAACATGCTCTTGGCG       |
| <i>NRIP1</i>      | NM_003489.2    | 335-435   | TGACTCATGGAGAAGAGCTTGCTGTGATGTCACCAGGATTCTATTGTTTTAACTTACCTAGAAGGATTACTAA<br>TGATCAGGCGAGCAGGGGATCAGG    |
| <i>NRP1</i>       | NM_003873.5    | 370-470   | GCCTCGTCTTTCTTTTCTCAAGACGGGCTGAGGATTGACAGCTCTAGGCGGAGTGGGGCTCTCCGAT<br>CGTTAGATTCTCTCTTTGCTGCATT         |

|                 |                |           |                                                                                                          |
|-----------------|----------------|-----------|----------------------------------------------------------------------------------------------------------|
| <i>NT5E</i>     | NM_002526.2    | 1214-1314 | ATTCGGGTTTTGAAATGGATAAACTCATCGCTCAGAAAAGTGAGGGGTGGACGTCGTGGTGGGAGGACACTC<br>CAACACATTCTTTACACAGGCAATCC   |
| <i>OAZ1</i>     | NM_004152.2    | 313-413   | GGTGGCGAGGGAATAGTCAGAGGGATCACAATCTTTCAGCTAACTATTCTACTCCGATGATCGGTGAATGT<br>AACAGAGGAACTAACGTCCAACGACA    |
| <i>OPTN</i>     | NM_001008211.1 | 625-725   | TGAAGCTAAATAATCAAGCCATGAAAGGGAGATTTGAGGAGCTTTCCGCTGGACAGAGAAACAGAAGGAAGA<br>ACGCCAGTTTTTTGAGATACAGAGCAA  |
| <i>P2RX7</i>    | NM_002562.4    | 340-440   | AGTTGGTGACAGTGTCTTTGACACCGCAGACTACACCTTCCCTTTCAGGGGAACTCTTTCTCGTGATGACA<br>AACTTTCTCAAAACAGAGGCAAGA      |
| <i>PAX5</i>     | NM_016734.1    | 2288-2388 | CTCCAAGAGGAGCACACTTTGGGGAGATGCTCTGGTTCTCTGCTCCATTTCTCTGGGACCGATGCAGTATCAG<br>CAGCTCTTTCCAGATCAAGAACTC    |
| <i>PDCD1</i>    | NM_005018.1    | 175-275   | CTTCTCCAGCCCTGCTCGTGGTGCCGAAGGGGACAACGCCACCTTACCTGCAGCTTCTCAACACATCG<br>GAGAGCTTCGTGCTAAACTGGTACC        |
| <i>PDCD1LG2</i> | NM_025239.3    | 235-335   | TGTGGAGCTGTGGCAAGTCTCATATCAAAATACAGAACATGATCTTCTCTGCTAATGTTGAGCTGGAATTG<br>CAGCTTACCAGATAGCAGCTTTATT     |
| <i>PDE3A</i>    | NM_000921.3    | 3010-3110 | CTGGCCAACTTCAGAACTCTTCTCATCTCACATTGTGGGCCTCTGTGCAACTCCTATGATTGAGCAGGACT<br>AATGCTTGGAAAATGGTGGCAACA      |
| <i>PDE4A</i>    | NM_001111307.1 | 3855-3955 | AATAATGGTGATACCCCTATTCTCATTCTGGGAGCCCTTCTTCCACCTTGGCACAAAATAATTTCTCTC<br>CATCCGTACCTTGCCTAGCCTCTC        |
| <i>PDE7A</i>    | NM_002604.2    | 2210-2310 | TGAGTCAACAAGGAATAGAGGGAGGAGTGAATTTTGGTAGCTGGTGAATAGGGCCTTTGAGAATCAGAC<br>TGAACACAGTGAATATGTGCCAAA        |
| <i>PK1</i>      | NM_002610.3    | 1170-1270 | TGGATTGCCATATCAGCTTTTACGCACAATACTCCAAGGAGACCTGAAGCTGATTCCCTAGAGGGTTACG<br>GGACAGATGCAGTTATCTACATTAAG     |
| <i>PDXK</i>     | NM_003681.3    | 580-680   | TCCCGAGGACCTCTTCCCTCTCAAAAGAAAAAGTGGTCCGCTTGCAGACATTATCACGCCAACCCAGTTT<br>GAGCCGAGTTACTGAGTGGCCGAA       |
| <i>PECAM1</i>   | NM_000442.3    | 1365-1465 | ATCTGCACTGCAGTATTGACAAGTGGTCAAGAAAAGCAACAGTCCAGATAGTCGATGTGAATGCTCTC<br>CCAGCCAGGATTCTTATGATGCC          |
| <i>PHACTR2</i>  | NM_001100164.1 | 8350-8450 | GGCAGAATGCCACTTACCCTCAGTCAATTTATGGTATATGAAAATGCCAGTAATATTGTGCCACTTGCCAA<br>CTCGGGGAGGAGGGGCTTTCCCT       |
| <i>PHC1</i>     | NM_004426.2    | 2905-3005 | ATACAGCTCCACCTACCCGGAATTCATGGCATCAACCTGTGTTCTGCTCCAGTAATCCAGCCGTTGGAGT<br>GTAGAGGAGGTGTACGAGTTTATTC      |
| <i>POLR1B</i>   | NM_019014.3    | 3320-3420 | GGAGAACTCGGCTTAGAATCTTTGGTGGATGTTAAAGGCTGCTGGTACAATTTCTATGGCACCAGAGGT<br>TATATAGTGGCATCAGTGGGTAGAA       |
| <i>POLR2A</i>   | NM_000937.2    | 3775-3875 | TTCCAAGAAGCCAAAGACTCCTTCGCTTACTGCTTCTGTTGGCCAGTCCGCTCGAGATGCTGAGAGGCCA<br>AGGATATTCTGTGCCGCTGGAGCAT      |
| <i>POP5</i>     | NM_015918.3    | 560-660   | GCTTCAGGCCACTTGTGAACAGAACAACTGGGTAGCAACAGCATTTCCACAGTTTTCCAACTGGATAGC<br>TGCCAACCCAGCAGACATTACCCT        |
| <i>POU5F1</i>   | NM_002701.4    | 1225-1325 | AAGTTCTTCACTCAAGGAAGGAATGGGAACAAAAGGTGGGGGAGGGGAGTTGGGCAACTGGTTG<br>GAGGGAAGGTGAAGTTCAATGATGCTC          |
| <i>PPARA</i>    | NM_001001928.2 | 5220-5320 | GGGTGTTTGTATACGAACATATGGACGTGAAGTGGGCAGAAACCAGAACTCAGCATTCAAGGATGCC<br>CAGGAGAGCTGTCCCTGTTTTAAAGAG       |
| <i>PPP2R1A</i>  | NM_014225.3    | 1440-1540 | AACCTAACCCTTGTGCATGGCCTGGCTTGTGATCATGTATGCCATCCGGAGGCAGCCACCAGCAACCTG<br>AAGAAGCTAGTGGAAAAGTTGGGAA       |
| <i>PRDM1</i>    | NM_182907.1    | 310-410   | CATCCCTCCAACCAGAACTTCTGTGGTATTGTCGGACTTTCAGAAAGGCTTCACTACCCTTATCCCG<br>GAGAGCTGACAATGATGAATCTACA         |
| <i>PRF1</i>     | NM_005041.3    | 2120-2220 | ACTGTTTTTCAGGGAGGTGGTGGTTTACACGCTAATCCGATTACCCTGTCCAACTGCCTAAGCCCTCCG<br>CCATTCTCAGCCCTGCAGTACAGC        |
| <i>PRKAA2</i>   | NM_006252.2    | 975-1075  | ATAGTGTGACCTCAAGCAGCTTGCAGTGGCTTATCATTTATCATTGACAATCGGAGAATAATGAACAA<br>GCCAGTGAAGTTTACTCCGCTCTAG        |
| <i>PRKCQ</i>    | NM_006257.2    | 1325-1425 | GATGGACGATGATGTTGAGTGCACGATGGTAGAGAAGAGATTCTTCTTGGCTGGGAGCATCCGTTTCTG<br>ACGCACATGTTTGTACATCCAGACC       |
| <i>PROM1</i>    | NM_006017.1    | 925-1025  | AGCTGCGGTATCTCAATGACCCTCTGTGCTTGGTGCATCCATCAAGTGAACCTGCAACAGCATCAGATT<br>GTCTTAAGCCAGCTGAATAGCAACC       |
| <i>PTGER2</i>   | NM_000956.2    | 1410-1510 | GTCAGAAGGAGCTACAAAACCTACCCTCAGTGCATGGTACTTGGCTTTGGAGAACAACTGGCTGCATTG<br>AAGATCCAGCTGCCTATTGATTAAGC      |
| <i>PTK2</i>     | NM_005607.3    | 1005-1105 | GGTTCAAGCTGGATTATTTAGTGAAGTGGCAATCGCCAGAAAGGAATCAGTTACCTAACGGACAAGG<br>GCTGCAATCCACACATCTGCTGACT         |
| <i>PTPN11</i>   | NM_002834.3    | 4650-4750 | TAGTCCCTAGGTTGCTACGGCTTATCATGTGCTTGGTAAAAGGTGATCGAGGTTCTCAGACGAGTTACTTTAC<br>ATGAGATGGAATCAGGCAGAGGCG    |
| <i>PTPN4</i>    | NM_002830.2    | 705-805   | TCGAGGCTTTTTTCTCCAGCCGAGAGGACGCGGCTGTGATATACGAAGACTTTGTGTGGACAGTAATGACCTC<br>ACGTTTTCCGATTGCCTGCTGGCAGAA |
| <i>PTPN6</i>    | NM_002831.5    | 1734-1834 | TGGTGCAGACGGAGGCGCAGTACAAGTTCTCATCTGCTGGCCATCGCCAGTTTATTGAAACCACTAAGAAGAA<br>GCTGGAGGCTCCTGAGTCCGAGAAGGG |
| <i>PTPRK</i>    | NM_001135648.1 | 4315-4415 | GTGATCAACCGGATTTTAGATATGCAATCAACAAGACCACAGGAAGTTATCTGATGGTCAACAGTTTCA<br>GTACCTAGGATGGGCTTCTCATCGAG      |
| <i>RAB31</i>    | NM_006868.3    | 3800-3900 | TTTTGTAAGAGCTTCCATCTGGGCTGGACCCAGTCTTGCACATACAAGACACCGCTGCAGTCACTAGGACC<br>TTCCGCCATGATTTCTATTCTGTAG     |
| <i>RAC1</i>     | NM_198829.1    | 1250-1350 | AAAGACTTCTGCTTTGAGAAGCGGTAGCTTCTGCAGTTAGGAGGTGCAGACACTTGTCTCTATGTAGTTT<br>TCAGATGCTGAAGCAGAACGCCTC       |
| <i>RAC2</i>     | NM_002872.3    | 1069-1169 | GCTGCCACAACCTGTGTACTTTCAGGATGGGCTTACTCCCTCTGAGGCCAGCTGCTAATATCGATGG<br>TCTGCTTCCAGAGAGTTCTCTACT          |

|                 |                |           |                                                                                                          |
|-----------------|----------------|-----------|----------------------------------------------------------------------------------------------------------|
| <i>RAF1</i>     | NM_002880.2    | 1990-2090 | CCTATGGCATCGTATTGTATGAAGTATGACGGGGAGCTTCCTATTCTCACATCAACAACCGAGATCAGATC<br>ATCTTCATGGTGGGCGAGGATATGC     |
| <i>RAP1GAP2</i> | NM_015085.4    | 4140-4240 | CCCACGGCTGGAAGAGGCCTGTACGTTCTGGACGCGTTTTGTTGGCTGGGCTTCTGGAGGCACTGGCAAGG<br>TCAAAGTGCATTTCTTTAAGAACAGTTG  |
| <i>RARA</i>     | NM_000964.2    | 115-215   | AGCCACCTAGCTGGGGCCATCTAGGAGTGGCATCTTTTTGGTGCCTGAAGGCCAGCTCTGGACCTCCCA<br>GGAAAAGTGCCAGCTCACAGAAGTCT      |
| <i>RBPMS</i>    | NM_001008710.1 | 842-942   | AAACAGCCTGTAGTTTTGTCTAGTTTTGACAGTCGCTCAGAAGCAGAGGCTGCAAAGAATGCTTTGAATGGCAT<br>CCGCTTCGATCCTGAAATCCGCAAA  |
| <i>RHOA</i>     | NM_001664.2    | 1230-1330 | GGTACTCTGGTGAGTACCACCTTCAGGGCTTACTCCGTAACAGATTTGTTGGCATAGCTCTGGGGTGGCAG<br>TTTTTGAATGGGCTCAACCAGAA       |
| <i>RNF125</i>   | NM_017831.3    | 790-890   | GCAAGTGTGTATGTCCCTTTGTCTAGAGGGAAGTGTATGAAGACAGCTTGTGGATCATTGTATTACTCATCAC<br>AGATCGAAGCGGAGGCTGTGTTCT    |
| <i>RORA</i>     | NM_134261.2    | 1715-1815 | AAAATTAACCGAGACACTTTATATGGCCCTGCACAGACCTGGAGCGCCACACTGCACATCTTTGGTGATCG<br>GGGTCAGGCAAGGAGGGGAAACAAT     |
| <i>RORC</i>     | NM_001001523.1 | 1350-1450 | CTCATCAATCCCCTCGCCAGGGCTCCAAGAGAAAAGGAAAGTAGAACAGCTGCAGTACAATCTGGAGCTGG<br>CCITTCATCATCTCTGCAAGACTC      |
| <i>RPL27</i>    | NM_000988.3    | 23-123    | GGGCCGGTGGTTGCTGCCGAAATGGGCAAGTTCATGAAACCTGGGAAGGTGGTCTGTCTGGCTGGACG<br>CTACTCCGGACGCAAGCTGTCTCGTG       |
| <i>RPS13</i>    | NM_001017.2    | 331-431   | GCACTTTGAGAGAACAGAAAGATAAGGATGCTAAATCCGTCTGATTCTAATAGAGAGCCGGATTACCCTTT<br>TGGCTCGATATTATAAGACCAAGCGA    |
| <i>RUNX1</i>    | NM_001754.4    | 635-735   | CAGCCATGAAGAACCAGGTTGCAAGATTAATGACCTCAGGTTTGTCCGTCGAAGTGAAGAGGGAAAAGCTT<br>CACTCTGACCATCACTGTCTTACAAA    |
| <i>RUNX2</i>    | NM_004348.3    | 1850-1950 | GAAAGCCACAGCAGTTCCCAAGTGTGTTGAATCTAGTGGCAGAATGGATGAATCTGTTGGCCACCATTGA<br>AATTCCTCAGCAGTGGCCCACTGGTA     |
| <i>RUNX3</i>    | NM_004350.1    | 2085-2185 | GTGGTCTATAATCCATTTGTGGAGAGAACAGGAGGCCAGATAGATAGGCTTAGCAGAAAGCATTGAGGT<br>GAGGGATCATTTGGGTCAGACATCAA      |
| <i>S100A4</i>   | NM_002961.2    | 263-363   | CAGGACAACGAGGTGGACTTCCAAGAGTACTGTGTCTTCTGTCTGCATCGCCATGATGTAAACGAATCT<br>TTGAAGGCTTCCAGATAAGCAGCC        |
| <i>S100A6</i>   | NM_014624.3    | 539-639   | TTCTGGGGCTTGGCTTGTACTACAATGAAGCCCTCAAGGGCTGAAAATAAATAGGAAGATGGAGACAC<br>CCTCTGGGGTCTCTCTGAGTCAAA         |
| <i>SATB1</i>    | NM_001131010.1 | 1335-1435 | TTCCGAAATCTACCAGTGGGTACGCGATGAACTGAAACGAGCAGGAATCTCCAGGCGGATTTTGCACGTGTG<br>GCTTTTAAACAGAACTCAGGGCTTGCTT |
| <i>SCML1</i>    | NM_001037540.1 | 925-1025  | GCAACGATGGTCTTCTTCCAGGCTCTGCCTTGGCAACCTCGGGCTGACAGCATCCACAACACTTACTCAAC<br>TGACCATGCTTCTGACGACCACCTT     |
| <i>SCML2</i>    | NM_006089.2    | 360-460   | ATTGGAAGCCGTCACCTCGCAATGCCACTTCAAGTATGATTGCTACGGTATTGGAATTACTGGGCCAGGT<br>TACGGTTACGACTGGATGGTAGTAC      |
| <i>SEL1L</i>    | NM_005065.4    | 980-1080  | GGGCAATCTAATAGCCACATGTTTTGGGTTACAGATACTGGGCTGGCATCGGCGTCTCCAGAGTTGTGAAT<br>CTGCCCTGACTCACTATCGTCTGTT     |
| <i>SELL</i>     | NM_000655.3    | 110-210   | CTCCCTTTGGGCAAGGACTGAGCCCTGTGCTAAGTCAAGAGGCTCAATGGGCTGCAGAAGAACTAGAGAA<br>GGACCAAGCAAGCCATGATTTTCCA      |
| <i>SEPLG</i>    | NM_003006.3    | 2297-2397 | CATGGGCTGTAGGTTGACTTCAGTTTTGCCTTGGACAACAGGGGCTTGTACATCTTGGGTGACCAGGA<br>AAAGTTCAGGCTATGGGGGGCCAAAG       |
| <i>SERPINE2</i> | NM_006216.2    | 240-340   | CGTGCCTTCCATCTGCTCCCAATCTCTGCTCTCGAGGAAGTGGCTCCAACACGGGGATCCAGGTT<br>TTCAATCAGATTGTGAAGTCGAGGCC          |
| <i>SH2B3</i>    | NM_005475.2    | 4285-4385 | CCTCCAGCCAGAAGTTAAACATCTGGGATATGACGCTTTCATGCCAGGGGCACTATTCTTAGCAGCCTCTCT<br>ACATACATCTCAGGTGGTCCAAAG     |
| <i>SH2D2A</i>   | NM_001161443.1 | 341-441   | TGCTGGAGCCCAAGCCTCAGGGGTGCTACTTGGTCCGGTTCAGCGAGAGCGGGTACCTTCTGCTGACTT<br>ACAGGAGCCGACTTCTGCCGCACTT       |
| <i>SIT1</i>     | NM_014450.2    | 720-820   | GCCCCAGCCCCGTCAGCAGGGGATGACTGTTTCCAACCAGCACCACAAAGAGGGGCCATTGCCAAGTC<br>ACAGGATGTGATCTACCCCGGACTTCT      |
| <i>SKAP1</i>    | NM_003726.3    | 1360-1460 | AAGTGGGAAGAGGCAGTTCATCAAACTGTACTAAACCAGCCTAGTCATAGCTCATCCCATCTCTAAATGT<br>GTCCACACAACACATCTGCCTTTTC      |
| <i>SKAP2</i>    | NM_003930.3    | 3374-3474 | TTTTACAGTTAATCCAGGAGAGGGAGTCTTTGCCAAGTATGACCAACAGTTCCAAGCCAGATAGTCTCGTGA<br>ACAGTGACATAACAGAAATAAGGTTG   |
| <i>SLA2</i>     | NM_032214.2    | 1640-1740 | AAAGGAAAGCTGAGATGATGCTTACCGTAGCAGCAGATCTGGATGGTCCAGGCTCTATGTGACCTCCAGAG<br>CAAAGAGAAAGACTTCGGACAGTCTAG   |
| <i>SLAMF1</i>   | NM_003037.2    | 580-680   | GTGTCTCTGATCCATCCGAAGCAGGCCCTCCAGTATCTAGGAGATCGTACAAGTTTTATCTGGAGAATCT<br>CACCTGGGGATACGGGAAAGCAGGA      |
| <i>SLAMF7</i>   | NM_021181.3    | 215-315   | GGGCACTATCATAGTACCCAAAATCGTAATAGGGAGAGAGTAGACTTCCAGATGGAGGCTACTCCCTGAAG<br>CTCAGCAAACTGAAGAAGTACTCA      |
| <i>SLC2A1</i>   | NM_006516.2    | 2500-2600 | AGGCTCCATTAGGATTTGCCCTTCCCATCTCTTCTACCAACCACTCAAATTAATCTTTCTTACCTGAGACCA<br>GTTGGGAGCACTGGAGTGCAGGGA     |
| <i>SMAD3</i>    | NM_005902.3    | 4220-4320 | TTAAAGGACAGTTGAAAAGGGCAAGAGGAAACCAGGGCAGTCTAGAGGAGTCTGGTACTGGATAGCAGTT<br>TTAAGTGGCGTTCACTTAGTCAACAGC    |
| <i>SMAD4</i>    | NM_005359.3    | 1370-1470 | AGGTTGCACATAGGCAAGGTTGTCAGTTGGAATGTAAGGTGAAGGTGATGTTGGGTCAGGTGCCTTAGTG<br>ACCACCGGCTCTTGTACAGAGTACT      |
| <i>SNAI1</i>    | NM_005985.2    | 63-163    | GACCACATGCCCGCTCTTTCCTGTCAGGAAGCCCTCCGACCCCAATCGGAAGCCTAACTACAGCGAGCTG<br>CAGGACTTAATCCAGAGTTTACCTTC     |
| <i>SOCS1</i>    | NM_003745.1    | 1025-1125 | TTAAGTATCTGGAGCCAGGACCTGAACTCGCACCTCTACCTCTCATGTTACATATACCCAGTATCTTTGC<br>ACAAACCAGGGTTGGGGGAGGGTC       |

|               |                |           |                                                                                                          |
|---------------|----------------|-----------|----------------------------------------------------------------------------------------------------------|
| <i>SOCS3</i>  | NM_003955.3    | 1870-1970 | GGAGGATGGAGGAGACGGACATCTTTCACCTCAGGCTCCTGGTAGAGAAGACAGGGGATTCTACTCTGTGCC<br>TCCTGACTATGTCTGGCTAAGAGATTC  |
| <i>SOD1</i>   | NM_000454.4    | 35-135    | GCCTATAAGTAGTCGGGAGACGGGGTGTGGTTGCGTCGTAGTCTCTGCAGCGTCTGGGGTTCCGTTG<br>CAGTCTCGGAACCAGGACCTCGGCGT        |
| <i>SOX13</i>  | NM_005686.2    | 3039-3139 | ATTTATTGAGTGCCACTACGTGCCAGGCACTGTTGCTGAGTTCCTGTGGGTGTGTCTCTCGATGCCACTCCTG<br>CTTCTCTGGGGGCTCTTCTGTGCT    |
| <i>SOX2</i>   | NM_003106.2    | 151-251   | CTTAAGCCTTTCAAAAAATAATAACAATCATCGGCGGGCAGGATCGGCCAGGAGGAGGGAAGCGC<br>TTTTTTGATCCTGATCCAGTTTGCC           |
| <i>SOX4</i>   | NM_003107.2    | 3040-3140 | GTTACGGTCAAACGAAATGGATTTGCACGTTGGGAGCTGGCGGGCGGCTGCTGGGCCCTCCGCTTCT<br>TTTCTACGTGAAATCAGTGAGGTGAGAC      |
| <i>SOX5</i>   | NM_152989.2    | 1885-1985 | TAGCCATGCAATGATGGATTTCAATCTGAGTGGAGATTCTGATGGAAGTCTGGAGTCTCAGAGTCAAGATTT<br>ATAGGGAATCCCAGGGCGTGGTAGC    |
| <i>SPI1</i>   | NM_003120.1    | 730-830   | CTCCGACGGCGGACATGAAGGACAGCATCTGGTGGTGACAAGGACAAGGGCACCTTCCAGTTCTCGTCC<br>AAGCACAAAGGAGCGCTGGCGCACCGCT    |
| <i>SPN</i>    | NM_001030288.1 | 2798-2898 | AAGCCAGGCTTCATGAAAGATCGTATGTGTGACCCAAATAGAGTTCTCAGCTCAGCCATGGTAATCCCTTC<br>CTTGAAGTCTCCATTTCTGAGTACA     |
| <i>SPRY2</i>  | NM_005842.2    | 85-185    | AAAGAGAAATACTCCGCTGCGCTTGTAGAAGGGAGTCTCCAGCTCCGAACCCCGAGTGTTCATCAG<br>CGGGGAATCTGGCTCCGAATCTCTTT         |
| <i>STAT1</i>  | NM_007315.2    | 205-305   | TTTGTGTATGCCATCCTCGAGAGCTGTAGTTAACGTTCCACTCTGTGTATATAACCTCGACAGTCTTGGC<br>ACCTAACGTGCTGTGCGTAGCTGCT      |
| <i>STAT3</i>  | NM_139276.2    | 4535-4635 | AGACTTGGGCTTACCATTGGGTTTAAATCATAGGGACCTAGGGCGAGGGTTCCAGGCTTCTCTGGAGCAGATA<br>TTGTCAAGTTCATGGCCTTAGGTAGCA |
| <i>STAT4</i>  | NM_003151.2    | 789-889   | AGACAATGGATCAGAGTGACAAGAATAGTCCATGGTGAATCAGGAAGTTTGACACTGCAGAAATGCTTAAC<br>AGCCTCGATTTCAAGAGAAAGGAGGC    |
| <i>STAT5A</i> | NM_003152.2    | 3460-3560 | GAGACAGAGAGAGAGAAGAGAGAGTGTGTGGTCTATGTAATGCATCTGTCTCATGTGTGATGTAACCGA<br>TTCATCTCTCAGAGGGAGGCTGGGG       |
| <i>STAT5B</i> | NM_012448.3    | 200-300   | AAGGAGAAGCCCTTTCATCAGATGCAAGCGTTATATGGCCAGCATTTTCCATTGAGTGTGGCATTATTTATCC<br>CAGTGGATTGAAAGCCAAGCATGGGA  |
| <i>STAT6</i>  | NM_003153.3    | 2030-2130 | AGAACATCCAGCATTCTCTGCCAAAGACCTGTCCATTGCTCACTGGGGACCGAATCCGGGATCTGTCTCA<br>GCTCAAAATCTCTATCCCAAGAGCC      |
| <i>STMN1</i>  | NM_203401.1    | 287-387   | CGTGGTGGCGGACAGGATTTCTTATCCAGTTGATTGTGCAGAATACTGCCTGTGCTTGTCTTCTATTTC<br>ACCATGGCTTCTCTGATATCCAGGT       |
| <i>SYK</i>    | NM_003177.3    | 1685-1785 | CGGACTCTCCAAAGCACTCGTGTGATGAAACTACTACAAGGCCAGACCCATGGAAGTGGCTGTCAAG<br>TGGTACGCTCCGGAATGCATCAACTAC       |
| <i>TAL1</i>   | NM_003189.2    | 4635-4735 | ACAGCATCTGTAGTCCGACAACTATTTCCGCTTTTGGGGTGGGTCTGGCCGACTTGTGATTTGATGG<br>TACGTGACCCCTGCTGAAAGCTTGC         |
| <i>TBP</i>    | NM_003194.3    | 25-125    | CGCCGGCTGTTAACTTCGCTTCCGCTGGCCATAGTGATCTTTCAGTGACCCAGCAGCATCACTGTTCTTG<br>GCGTGTGAAGATAAACCAGGAATTG      |
| <i>TBX21</i>  | NM_013351.1    | 890-990   | ACACAGGAGCGCACTGGATGCGCCAGGAAGTTTCAATTTGGGAACTAAAGCTCACAAACAAGGGGGCGTC<br>CAACAATGTGACCCAGATGATTGTGCT    |
| <i>TBXA2R</i> | NM_001060.3    | 385-485   | CACACGGCTCCTCCTCCTCACCTTCTCTGCGCCCTGCTCACCAGCTTCTGGGGTGTGGTGACCG<br>GTACCATCGTGGTGTCCAGCAGCAGCCG         |
| <i>TCF12</i>  | NM_207037.1    | 1105-1205 | CACATGACCGCTTGTAGTTACTCCCACTCAGTTTCCACCAACAGACATAAACACGAGTCTTCCACCAATGTCCA<br>GCTTTCATCGCGGAGTACCAGCAG   |
| <i>TCF3</i>   | NM_003200.2    | 4325-4425 | ATACGTGTCAACACAGCTGGCTGGATGATTGGGACTTAAACGACCCTTTCAGGTGATTGAGACCTGT<br>CCTGTATATAACAGCACTGTAGCAAT        |
| <i>TCF7</i>   | NM_003202.2    | 2420-2520 | ATTCCATTTCCAGTTCATCTATGGCAGTCCAGCCAGCTCCTGGGAGCTTGGAGGGCAAACCCAAACCTCAT<br>GACAGCCAGAGCCTGTCTTTCAGCAT    |
| <i>TDGF1</i>  | NM_003212.2    | 1567-1667 | AAGGAAAGAAAACATCTTAAAGGGAGGAACAGAGTGTGAAGGAATGGAAGTCCATCTCGTGTGTGACGG<br>GAGACTGGGTAGGAAAGAGGAAGCAAA     |
| <i>TDO2</i>   | NM_005651.1    | 0-100     | AAGTCAATGATAGCATCTGCCTAGAGTCAAACCTCCGTGCTCTCAGACAGTGCCTTTTACCATGAGTGGGT<br>GCCCATTTTTAGGAAACAACCTTTGGA   |
| <i>TEK</i>    | NM_000459.2    | 615-715   | CGAGTTCGAGGAGGGAATCAGGATACGAACCATGAAGATGCGTCAACAAGCTTCTTCTACCAGCTACTTT<br>AACTATGACTGTGGACAAGGGAGATA     |
| <i>TERF1</i>  | NM_003218.3    | 1037-1137 | CTGAAAGCAGAATACCTGTTTCAAGAGTCCAGCCGTAACCTCTGAAAAACATCGAGCTAGAAAAAGACAGGCA<br>TGGCTTTGGGAAGAAGACAAGAAATTT |
| <i>TERT</i>   | NM_198253.1    | 2570-2670 | GGCTTCAAGGCTGGGAGGAACATGCGTCGCAAACTTTTGGGGTCTTGGCGCTGAAGTGTACAGCCTGTTTC<br>TGGATTGCAAGGTGAACAGCCTCCAGA   |
| <i>TF</i>     | NM_001063.2    | 640-740   | CTGCTCCACCCTTAACCAATACTTCGCTACTCGGGAGCCTTCAAGTGTCTGAAGGATGGTGTGGGATGTG<br>GCCTTTGTCAAGCACTCGACTATATTT    |
| <i>TFRC</i>   | NM_003234.1    | 1220-1320 | CAGTTTCCACCATCTCGGTATCAGGATTGCCTAATATACCTGTCCAGACAATCTCCAGAGTGTGCAGAAAA<br>GCTGTTTGGGAATATGGAAGGAGACT    |
| <i>TGFA</i>   | NM_003236.2    | 780-880   | TGCCACAGACTTCTACTTGGCCTGTAATCACCTGTGCAGCCTTTTGGGCTTCAAACTGTCAAGAAC<br>TCCGCTGCTTGGGGTATTGAGTGT           |
| <i>TGFB1</i>  | NM_000660.3    | 1260-1360 | TATATGTTCTCAACACATCAGAGCTCCGAGAAGCGGTACCTGAACCCGTTGCTCTCCGGGAGAGCTGC<br>GTCTGTGAGGCTCAAGTTAAAGTGG        |
| <i>TGFB2</i>  | NM_003238.2    | 1125-1225 | AAGCCAGAGTGCCTGAACAACGGATTGAGCTATATCAGATTCTCAAGTCCAAAGATTTAACATCTCCAACCCAG<br>CGCTACATCGACAGCAAGTTGTGAA  |
| <i>TGFB1</i>  | NM_004612.2    | 4280-4380 | GGGAAATACGACTTGTGAGGATAGACATCCCTGGTCCATCTTCTGTCTCCAGCTGTTTCTTGGAACTGT<br>CTCTCTGCTGTGGTCCCTGACGC         |

|                         |                |           |                                                                                                             |
|-------------------------|----------------|-----------|-------------------------------------------------------------------------------------------------------------|
| <i>Thymidine Kinase</i> | SCFV007.1      | 100-200   | TCTACGTACCCGAGCCGATGACTTACTGGCAGGTGCTGGGGCTCCGAGACAATCGCAACATCTACACCAC<br>ACAACACCGCCTCGACCAGGGTGAGAT       |
| <i>TIE1</i>             | NM_005424.2    | 2610-2710 | CATCGGGGAGGGAACTTCGGCCAGGTCATCCGGGCCATGATCAAGAAGGACGGCTGAAGATGAACGCAGC<br>CATCAAAATGCTGAAAGAGTATGCCTCT      |
| <i>TLR2</i>             | NM_003264.3    | 180-280   | CTGCTTTCAACTGGTAGTTGTGGGTTGAAGCACTGGACAATGCCACATACTTTGTGGATGGTGTGGGCTTGGG<br>GGTCATCATCAGCCTCTCCAAGGAAAG    |
| <i>TLR8</i>             | NM_138636.3    | 2795-2895 | GACAAAAACGTTCTCTTTGTCTAGAGGAGAGGGATTGGGATCCGGGATTGGCCATCATCGACAACCTCATGCA<br>GAGCATCAACCAAAGCAAGAAAACAG     |
| <i>TNF</i>              | NM_000594.2    | 1010-1110 | AGCAACAAGACCACCCTTCGAAAACCTGGGATTGAGGAATGTGTGGCCTGCACAGTGAAGTGTGGCAACCAC<br>TAAGAATTCAACTGGGGCCTCCAGAA      |
| <i>TNFRSF14</i>         | NM_003820.2    | 916-1016  | CTCAGGGAGCCTCGTCATGCTCATTGTTTGTCCACAGTTGGCCTAATCATATGTGTAAAAAGAAAGCCAA<br>GGGGTGATGTAGTCAAGGTATCGTC         |
| <i>TNFRSF18</i>         | NM_004195.2    | 445-545   | AGGGGAAATTCAGTTTGGCTTCCAGTGATCGACTGTGCCTCGGGACCTTCTCCGGGGCCACGAAGGCCA<br>CTGCAAACTTGGACAGACTGCACCCA         |
| <i>TNFRSF1B</i>         | NM_001066.2    | 835-935   | CCCAGCTGAAGGGAGCAGTGGCAGTTCGCTCTCCAGTTGGACTGATTGTGGGTGTGACAGCCTTGGGTCTA<br>CTAATAATAGGAGTGGTGAAGTGTGTC      |
| <i>TNFRSF4</i>          | NM_003327.2    | 200-300   | CCGTGCGGGCCGGGCTTACAAACGACGTGGTCACTCCAGCCGTCAAGCCGTCAAGCCCTGCACGTGGTGAACCTC<br>AGAAGTGGGAGTGAAGCGAAGCAGCTGT |
| <i>TNFRSF9</i>          | NM_001561.4    | 255-355   | AGATTTGCAGTCCCTGCTCCTCAATGTTTCCAGCGCAGGTGGACAAAGGACCTGTGACATATGCAGGCAG<br>TGTAAGGTGTTTTCAGGACCAGGAA         |
| <i>TNFSF10</i>          | NM_003810.2    | 115-215   | GGGGGACCCAGCCTGGGACAGACCTCGTGCTGATCGTATCTTACAGTGCTCCTGCAGTCTCTGTGTG<br>GCTGTAACCTACGTGACTTTACCAAC           |
| <i>TNFSF11</i>          | NM_003701.2    | 490-590   | TACCTGATTATGATAGGAGAATTAACAGGCCCTTCAAGGAGCTGTGCAAAAGGAATTACAACATATCGTTGGAT<br>CACAGCACATCAGAGCAGAGAAAGC     |
| <i>TNFSF14</i>          | NM_003807.2    | 270-370   | ATTTTCAGAAGCCTCGAAAGTCTGCACAGCCAGGAGTGTGAGCAATTCGGTTTCTCTGAGGTTGAAG<br>GACCAGGCGTGTGAGCCCTGTCTCCA           |
| <i>TOX</i>              | NM_014729.2    | 3950-4050 | AATGAGCAGCTTTGACTTTGACAGGCGGTTTGTGACAGAAAGCACAGTGCCGTGTTTACAGCTTTTCTAGA<br>GCAGCTGTGCGACCAGGTTAGAGAGT       |
| <i>TP53</i>             | NM_000546.2    | 1330-1430 | GGGGAGCAGGCTCACTCCAGCCACCTGAAGTCAAAAAGGGTCACTACCTCCCGCCATAAAAACTCATG<br>TTCAAGACAGAAGGGCCTGACTCAGAC         |
| <i>TRAF1</i>            | NM_005658.3    | 3735-3835 | CGAGTGATGGTCTAGGCCCTGAACTGATGCTCTAGCAATAACCTCTTGATCCCTACTACCAGAGTGTGAGC<br>CCAAGGGGGGATTTGTAGAACAAAGCC      |
| <i>TRAF2</i>            | NM_021138.3    | 1325-1425 | GTGGCCCTTCAACCAGAAGGTGACCTTAATGCTGCTCGACAGAATAACCGGAGCACGTGATTGACGCCTTC<br>AGGCCGACGTGACTTCATCCTCTTTT       |
| <i>TRAF3</i>            | NM_145725.1    | 1795-1895 | ATATGATGCCCTGCTTCTTGGCCGTTTAAAGCAGAAAGTGACACTCATGCTGATGGATCAGGGGCTCTCGAC<br>GTCATTTGGGAGATGCATTCAGAGCC      |
| <i>TSC22D3</i>          | NM_198057.2    | 1400-1500 | TTAAGCAGAGGCCAACCTCTCTCTCTCTCTGTTTCTGTAAGGCAGGGGACACAGATGGGAGAGATTGAGCCA<br>AGTCAGCCTCTGTTGGTTAATATGTT      |
| <i>TSLP</i>             | NM_033035.3    | 395-495   | CCGTCTTGTAGCAATCGGCCACTTGCCTTACTGAAATCCAGAGCCTAACCTTCAATCCACCAGCCGGCTGC<br>CGCTCGCTCGCCAAAGAAATGTTCCG       |
| <i>TXK</i>              | NM_003328.1    | 800-900   | ATGACTCGTCTCCGATATCCAGTTGGGCTGATGGCAGTTGTTACCAGCCACAGCTGGGTTAGCTACGAAAA<br>GTGGGAGATAGATCCATCTGAGTTGG       |
| <i>TYK2</i>             | NM_003331.3    | 485-585   | TCATCGCTGACAGCTGAGGAAGTCTGCATCCACATTGCACATAAAGTTGGTATCACTCCTCTTGCCTCAATCTC<br>TTTGCCCTCTTCGATGCTCAGGCC      |
| <i>TYROBP</i>           | NM_003332.2    | 457-557   | CTGCACCTCATTCCAACCTCTACCAGGATACAGACCACAGAGTCCATCCCTGAGAGACCAGACCCTCCCC<br>AATACTCTCTAAATAAATCAAGAAC         |
| <i>UBASH3A</i>          | NM_001001895.1 | 1970-2070 | GAGATGCTGTGTTTCCAGAGCGCTTAGTCTCACCAATGTGATTTGTAGAAGCACGAGACGCATTTATA<br>TCCCGGAATATTTCCCTCCGGCTTTC          |
| <i>VAX2</i>             | NM_012476.2    | 871-971   | CAGCGCCAGCAGCTGCAAGAAAGCTAACACTTAAGACTCCACCCCTGTGACACTGAGTCCCGAGCACAGCACC<br>TTCCAGTCTCTGTGCCCCAGCGGAC      |
| <i>VEGFA</i>            | NM_001025366.1 | 1325-1425 | GAGTCCAACATCACCATGCAGATTATGCGGATCAAACTCACCAAGGCCAGCACATAGGAGAGATGAGCTTCT<br>ACAGCACAAACAATGTGAATGCAGAC      |
| <i>WEE1</i>             | NM_003390.2    | 5-105     | TGCGTTTGAGTTTGCCCGAGCCGGCCAACTCGGTTTTGCCAACGCATGCCACGTGCTGGCAACAAATGTA<br>AACACGGAGATCGTGTGCCGGCAGT         |
| <i>XBP1</i>             | NM_005080.2    | 440-540   | GGAGTTAAGACAGCCTTGGGGATGGATGCCCTGTTGCTGAAGAGGAGGCGGAAGCCAAGGGGAATGAAGT<br>GAGGCCAGTGCCGGGCTGCTGAGTCC        |
| <i>XBP1</i>             | NM_001079539.1 | 935-1035  | ATTCATTGTCTCAGTGAAGGAAGAACCTGTAGAAGATGACCTCGTCCGGAGCTGGTATCTCAAACTGCTTT<br>CATCCAGCCACTGCCCAAAGCCATCT       |
| <i>YY1AP1</i>           | NM_139118.2    | 755-855   | ATGGAGCTATGCAGCTGATTGAAGACTTCAGCACACATGTCAGCATTGACTGCAGCCCTCATAAACTGTCAA<br>GAAGACTGCCAATGAATTTCCCTGTT      |
| <i>ZAP70</i>            | NM_001079.3    | 1175-1275 | GGAGCTCAAGGACAAGAAGCTTCTTGAAGCGGATAACCTCCTCATAGCTGACATTGAACCTTGGCTGCGGC<br>AACTTTGGCTCAGTGCCGAGGGCGTG       |
| <i>ZBTB16</i>           | NM_006006.4    | 1585-1685 | TCCTGGATAGTTTGGCGTGAAGATGCACCTACTGGCTCATTACGCGGGTCCAAAGCCCTTGTCTGTGATCAG<br>TCCGGTGCACAGTTTTCGAAGGAGGA      |
| <i>ZC2HC1A</i>          | NM_016010.2    | 665-765   | ACGATTACCCGACCAAGTGGCGCTGGCAAACTGTTGATAGTGTCTTCAAGTAAAGTCTTCAAGTAGCA<br>GCTCTTGGGAAACAACCTCAGACC            |
| <i>ZEB2</i>             | NM_014795.2    | 20-120    | TCCAGAGAGAAACTTGGCGATCAGTTTTTACATGATGCTCACGCTCAGGGCGCTTCAATTATCCCTCCCCAC<br>AAAGATAGTGGCGCGTGTTCAGGG        |
| <i>ZNF516</i>           | NM_014643.2    | 4830-4930 | GGTGGGGACGGCTTCATATACCTTCTCAGTAATGCAAAATGCGAGTTTTTGTGGTGGGGTTAAGGCCAT<br>AACAAGGATCTTAAACCATGCAGTG          |

**Table S2. Fold change in mRNA abundance of mbIL15-CAR T cells relative to CAR T cells**

| GENE      | logFC | PValue  | FDR     |          |      |         |         |
|-----------|-------|---------|---------|----------|------|---------|---------|
| IL7R      | -2.4  | 1.9E-05 | 6.7E-03 | SIP1     | -0.5 | 3.7E-01 | 1.0E+00 |
| NRP1      | -2.7  | 1.6E-04 | 2.9E-02 | ITGA1    | -0.5 | 3.7E-01 | 1.0E+00 |
| DAP12     | 1.9   | 3.1E-04 | 3.7E-02 | KIR3DL2  | -0.8 | 3.7E-01 | 1.0E+00 |
| CD4       | -1.9  | 5.5E-04 | 4.9E-02 | TBXA2R   | 0.6  | 3.8E-01 | 1.0E+00 |
| TNFRSF4   | -1.7  | 2.5E-03 | 1.5E-01 | CCR7     | -0.5 | 3.9E-01 | 1.0E+00 |
| TIE1      | -1.9  | 2.6E-03 | 1.5E-01 | RNF125   | -0.5 | 3.9E-01 | 1.0E+00 |
| HRH2      | 1.6   | 4.6E-03 | 2.2E-01 | ITGA4    | -0.4 | 4.1E-01 | 1.0E+00 |
| CPT1      | -1.6  | 5.0E-03 | 2.2E-01 | IL17RA   | 0.4  | 4.1E-01 | 1.0E+00 |
| PDCD1     | -1.6  | 8.6E-03 | 3.4E-01 | NOTCH1   | 0.4  | 4.1E-01 | 1.0E+00 |
| ICOSLG    | -1.3  | 1.3E-02 | 4.2E-01 | CD28     | -0.4 | 4.2E-01 | 1.0E+00 |
| CMRF35H   | -1.7  | 1.4E-02 | 4.2E-01 | BIM      | -0.5 | 4.2E-01 | 1.0E+00 |
| CCR4      | -1.4  | 1.4E-02 | 4.2E-01 | STMN1    | -0.4 | 4.3E-01 | 1.0E+00 |
| RORC      | 1.4   | 2.5E-02 | 6.4E-01 | LYN      | 0.4  | 4.3E-01 | 1.0E+00 |
| GILZ      | -1.1  | 2.6E-02 | 6.4E-01 | KIR2DS1  | 0.4  | 4.3E-01 | 1.0E+00 |
| CD86      | -1.3  | 2.7E-02 | 6.4E-01 | NKp30    | 0.4  | 4.4E-01 | 1.0E+00 |
| TSLPR     | -1.5  | 3.1E-02 | 6.8E-01 | TNFRSF18 | -0.5 | 4.4E-01 | 1.0E+00 |
| BCL6      | -1.1  | 3.8E-02 | 7.9E-01 | RUNX1    | 0.4  | 4.4E-01 | 1.0E+00 |
| PAX5      | 1.1   | 4.2E-02 | 8.3E-01 | SH2D2A   | 0.4  | 4.5E-01 | 1.0E+00 |
| IL23R     | 1.1   | 4.8E-02 | 8.9E-01 | PDK1     | -0.4 | 4.5E-01 | 1.0E+00 |
| KIR2DS2   | 1.1   | 5.2E-02 | 9.2E-01 | SELL     | -0.4 | 4.6E-01 | 1.0E+00 |
| CD40LG    | -1.1  | 6.3E-02 | 1.0E+00 | POU5F1   | -0.5 | 4.7E-01 | 1.0E+00 |
| IKZF2     | -1.0  | 7.6E-02 | 1.0E+00 | EGLN1    | -0.4 | 4.7E-01 | 1.0E+00 |
| BCL2      | 0.8   | 9.2E-02 | 1.0E+00 | TRAF1    | -0.4 | 4.7E-01 | 1.0E+00 |
| SOX5      | 1.3   | 1.1E-01 | 1.0E+00 | SOCS1    | 0.4  | 4.7E-01 | 1.0E+00 |
| SOX13     | -0.9  | 1.4E-01 | 1.0E+00 | KIR2DL1  | -0.7 | 4.8E-01 | 1.0E+00 |
| BNIP3     | -0.8  | 1.5E-01 | 1.0E+00 | IL23p19  | 0.4  | 4.8E-01 | 1.0E+00 |
| GZMH      | 0.7   | 1.5E-01 | 1.0E+00 | LNK      | 0.3  | 4.9E-01 | 1.0E+00 |
| CD11B     | -0.8  | 1.6E-01 | 1.0E+00 | SKAP1    | -0.4 | 4.9E-01 | 1.0E+00 |
| LEF1      | 0.9   | 1.6E-01 | 1.0E+00 | BIRC2    | -0.3 | 4.9E-01 | 1.0E+00 |
| SMAD3     | -0.7  | 1.6E-01 | 1.0E+00 | STAT1    | -0.2 | 5.0E-01 | 1.0E+00 |
| FLT1      | 0.7   | 1.6E-01 | 1.0E+00 | LAIR1    | -0.3 | 5.0E-01 | 1.0E+00 |
| KLRB1     | -0.7  | 1.7E-01 | 1.0E+00 | TNFRSF9  | -0.5 | 5.0E-01 | 1.0E+00 |
| CCL5      | -0.6  | 1.7E-01 | 1.0E+00 | MYB      | -0.4 | 5.0E-01 | 1.0E+00 |
| C5ORF13   | -0.8  | 1.8E-01 | 1.0E+00 | CDK4     | 0.4  | 5.0E-01 | 1.0E+00 |
| KLF2      | -0.6  | 2.0E-01 | 1.0E+00 | XBP1     | 0.4  | 5.0E-01 | 1.0E+00 |
| CD276     | -0.9  | 2.0E-01 | 1.0E+00 | TFRC     | -0.4 | 5.0E-01 | 1.0E+00 |
| LRP5      | 0.7   | 2.0E-01 | 1.0E+00 | SLA2     | 0.4  | 5.1E-01 | 1.0E+00 |
| P2RX7     | -0.7  | 2.1E-01 | 1.0E+00 | CD69     | 0.3  | 5.1E-01 | 1.0E+00 |
| NCAM1     | 0.6   | 2.1E-01 | 1.0E+00 | FAS      | -0.4 | 5.1E-01 | 1.0E+00 |
| ATF3      | 0.8   | 2.2E-01 | 1.0E+00 | CCL3     | 0.2  | 5.1E-01 | 1.0E+00 |
| ANXA1     | -0.7  | 2.2E-01 | 1.0E+00 | EGLN3    | -0.3 | 5.1E-01 | 1.0E+00 |
| EOMES     | -0.8  | 2.3E-01 | 1.0E+00 | TNF      | 0.2  | 5.2E-01 | 1.0E+00 |
| NFATC1    | -0.6  | 2.3E-01 | 1.0E+00 | IGF1R    | -0.3 | 5.2E-01 | 1.0E+00 |
| MMP14     | -0.8  | 2.5E-01 | 1.0E+00 | BACH2    | 0.3  | 5.2E-01 | 1.0E+00 |
| PHACTR2   | -0.7  | 2.6E-01 | 1.0E+00 | CD94     | -0.4 | 5.2E-01 | 1.0E+00 |
| GATA3     | -0.7  | 2.6E-01 | 1.0E+00 | BCL2L1   | 0.3  | 5.2E-01 | 1.0E+00 |
| CD44      | -0.6  | 2.6E-01 | 1.0E+00 | TXK      | 0.3  | 5.2E-01 | 1.0E+00 |
| AIM2      | -0.6  | 2.7E-01 | 1.0E+00 | IL10RA   | -0.3 | 5.3E-01 | 1.0E+00 |
| AGER      | -0.6  | 2.7E-01 | 1.0E+00 | RARA     | -0.4 | 5.3E-01 | 1.0E+00 |
| TGFBR1    | 0.6   | 2.8E-01 | 1.0E+00 | XBP1     | 0.3  | 5.3E-01 | 1.0E+00 |
| CSF2      | -0.7  | 2.9E-01 | 1.0E+00 | IL12RB2  | 0.4  | 5.3E-01 | 1.0E+00 |
| CD80      | -0.6  | 3.0E-01 | 1.0E+00 | DPP4     | 0.3  | 5.3E-01 | 1.0E+00 |
| IL10      | 0.4   | 3.2E-01 | 1.0E+00 | RUNX3    | 0.4  | 5.4E-01 | 1.0E+00 |
| FGL2      | -0.6  | 3.3E-01 | 1.0E+00 | HVEM     | -0.3 | 5.4E-01 | 1.0E+00 |
| MYC       | -0.5  | 3.4E-01 | 1.0E+00 | FLT3LG   | -0.3 | 5.4E-01 | 1.0E+00 |
| PHC1      | -0.6  | 3.5E-01 | 1.0E+00 | ITGAL    | -0.3 | 5.5E-01 | 1.0E+00 |
| LOC282997 | -0.5  | 3.5E-01 | 1.0E+00 | EPHA4    | -0.3 | 5.5E-01 | 1.0E+00 |
| ITGA5     | -0.6  | 3.6E-01 | 1.0E+00 | IL2RA    | -0.4 | 5.5E-01 | 1.0E+00 |
|           |       |         |         | PTGER2   | -0.3 | 5.6E-01 | 1.0E+00 |

|            |      |         |         |              |      |         |         |
|------------|------|---------|---------|--------------|------|---------|---------|
| ID2        | 0.3  | 5.6E-01 | 1.0E+00 | RAC2         | 0.2  | 7.4E-01 | 1.0E+00 |
| DNAM1      | -0.2 | 5.7E-01 | 1.0E+00 | NFATC2       | 0.2  | 7.5E-01 | 1.0E+00 |
| CD7        | 0.3  | 5.7E-01 | 1.0E+00 | STAT6        | -0.2 | 7.5E-01 | 1.0E+00 |
| SLAMF1     | -0.4 | 5.7E-01 | 1.0E+00 | GNLY         | 0.2  | 7.5E-01 | 1.0E+00 |
| BCLXL      | 0.2  | 5.9E-01 | 1.0E+00 | CCL4         | 0.0  | 7.5E-01 | 1.0E+00 |
| SATB1      | 0.3  | 5.9E-01 | 1.0E+00 | CD11C        | -0.2 | 7.5E-01 | 1.0E+00 |
| TP53       | 0.2  | 5.9E-01 | 1.0E+00 | CSAD         | -0.2 | 7.5E-01 | 1.0E+00 |
| MAD1L1     | 0.3  | 6.0E-01 | 1.0E+00 | ABCB1        | -0.2 | 7.6E-01 | 1.0E+00 |
| FOS        | 0.3  | 6.0E-01 | 1.0E+00 | CD8A         | 0.2  | 7.6E-01 | 1.0E+00 |
| NKG2D      | -0.3 | 6.0E-01 | 1.0E+00 | BMI1         | -0.1 | 7.6E-01 | 1.0E+00 |
| CDK2       | 0.2  | 6.0E-01 | 1.0E+00 | RAC1         | 0.2  | 7.6E-01 | 1.0E+00 |
| GZMB       | 0.2  | 6.0E-01 | 1.0E+00 | LAT          | -0.1 | 7.6E-01 | 1.0E+00 |
| IFNGR1     | 0.4  | 6.0E-01 | 1.0E+00 | PNK          | -0.2 | 7.6E-01 | 1.0E+00 |
| CTNNA1     | 0.2  | 6.1E-01 | 1.0E+00 | AP1          | 0.2  | 7.6E-01 | 1.0E+00 |
| ICOS       | -0.2 | 6.2E-01 | 1.0E+00 | STAT5B       | -0.2 | 7.6E-01 | 1.0E+00 |
| SNAI1      | -0.3 | 6.2E-01 | 1.0E+00 | CD19RCD28CAR | -0.3 | 7.7E-01 | 1.0E+00 |
| KIR2DL3    | 0.2  | 6.2E-01 | 1.0E+00 | CITED2       | 0.2  | 7.7E-01 | 1.0E+00 |
| LAG3       | 0.2  | 6.2E-01 | 1.0E+00 | DGKA         | -0.2 | 7.7E-01 | 1.0E+00 |
| HES1       | -0.3 | 6.2E-01 | 1.0E+00 | CD274        | -0.2 | 7.7E-01 | 1.0E+00 |
| CD85       | -0.3 | 6.3E-01 | 1.0E+00 | YAP          | -0.1 | 7.7E-01 | 1.0E+00 |
| PRF1       | 0.2  | 6.4E-01 | 1.0E+00 | IL2RG        | -0.2 | 7.7E-01 | 1.0E+00 |
| CDH1       | -0.3 | 6.5E-01 | 1.0E+00 | POP5         | 0.2  | 7.7E-01 | 1.0E+00 |
| VEGFA      | -0.2 | 6.5E-01 | 1.0E+00 | TRF          | 0.2  | 7.7E-01 | 1.0E+00 |
| mTOR       | 0.3  | 6.6E-01 | 1.0E+00 | SLC2A1       | -0.2 | 7.8E-01 | 1.0E+00 |
| AKT1       | 0.2  | 6.6E-01 | 1.0E+00 | NFATC3       | -0.2 | 7.8E-01 | 1.0E+00 |
| CD38       | -0.2 | 6.6E-01 | 1.0E+00 | CFLIP        | -0.1 | 7.9E-01 | 1.0E+00 |
| TRAF3      | 0.3  | 6.6E-01 | 1.0E+00 | SERPINE2     | -0.3 | 7.9E-01 | 1.0E+00 |
| GLIPR1     | -0.2 | 6.6E-01 | 1.0E+00 | PDCD1LG2     | -0.1 | 8.0E-01 | 1.0E+00 |
| Dock5      | 0.2  | 6.6E-01 | 1.0E+00 | CTLA4        | -0.2 | 8.0E-01 | 1.0E+00 |
| BCL2L11    | -0.3 | 6.6E-01 | 1.0E+00 | SLAMF7       | 0.1  | 8.0E-01 | 1.0E+00 |
| LAT2       | -0.3 | 6.6E-01 | 1.0E+00 | HOPX         | 0.1  | 8.1E-01 | 1.0E+00 |
| ANXA2P2    | 0.2  | 6.7E-01 | 1.0E+00 | TERT         | 0.2  | 8.1E-01 | 1.0E+00 |
| p38        | 0.3  | 6.7E-01 | 1.0E+00 | NFAT5        | -0.1 | 8.1E-01 | 1.0E+00 |
| ETV6       | -0.2 | 6.7E-01 | 1.0E+00 | SCAP2        | 0.1  | 8.1E-01 | 1.0E+00 |
| ATM        | 0.3  | 6.7E-01 | 1.0E+00 | TNFRSF1B     | -0.1 | 8.1E-01 | 1.0E+00 |
| KIR3DL3    | 0.3  | 6.8E-01 | 1.0E+00 | FANCC        | 0.1  | 8.1E-01 | 1.0E+00 |
| CBLB       | -0.3 | 6.8E-01 | 1.0E+00 | JUNB         | 0.1  | 8.1E-01 | 1.0E+00 |
| IL15RA     | -0.2 | 6.9E-01 | 1.0E+00 | NT5E         | -0.1 | 8.1E-01 | 1.0E+00 |
| CATHEPSINC | 0.2  | 6.9E-01 | 1.0E+00 | LGALS1       | -0.2 | 8.1E-01 | 1.0E+00 |
| MAPK8      | -0.2 | 6.9E-01 | 1.0E+00 | ITK          | 0.1  | 8.1E-01 | 1.0E+00 |
| FYN        | -0.2 | 6.9E-01 | 1.0E+00 | BAX          | 0.2  | 8.1E-01 | 1.0E+00 |
| ITGB1      | -0.3 | 6.9E-01 | 1.0E+00 | CCR6         | -0.1 | 8.2E-01 | 1.0E+00 |
| RUNX2      | -0.2 | 7.0E-01 | 1.0E+00 | APAF1        | -0.2 | 8.2E-01 | 1.0E+00 |
| CCR1       | 0.1  | 7.0E-01 | 1.0E+00 | BTLA         | 0.2  | 8.2E-01 | 1.0E+00 |
| PTPN4      | -0.2 | 7.0E-01 | 1.0E+00 | GADD45A      | 0.1  | 8.2E-01 | 1.0E+00 |
| FASLG      | 0.2  | 7.0E-01 | 1.0E+00 | B2M          | -0.1 | 8.2E-01 | 1.0E+00 |
| CD19Rscfv  | -0.3 | 7.0E-01 | 1.0E+00 | LDHA         | -0.2 | 8.2E-01 | 1.0E+00 |
| PDE4       | -0.2 | 7.1E-01 | 1.0E+00 | CD43         | -0.1 | 8.2E-01 | 1.0E+00 |
| STAT5A     | -0.2 | 7.1E-01 | 1.0E+00 | KLRC1        | 0.0  | 8.3E-01 | 1.0E+00 |
| SHP2       | 0.2  | 7.1E-01 | 1.0E+00 | STS2         | -0.2 | 8.3E-01 | 1.0E+00 |
| E2A        | -0.2 | 7.2E-01 | 1.0E+00 | HOXB3        | -0.2 | 8.3E-01 | 1.0E+00 |
| CREM       | 0.2  | 7.2E-01 | 1.0E+00 | IL15         | 0.2  | 8.3E-01 | 1.0E+00 |
| LTA        | -0.3 | 7.3E-01 | 1.0E+00 | RAP46        | -0.1 | 8.3E-01 | 1.0E+00 |
| FOXO3      | -0.2 | 7.3E-01 | 1.0E+00 | CDKN2C       | 0.1  | 8.3E-01 | 1.0E+00 |
| CASP1      | 0.2  | 7.3E-01 | 1.0E+00 | MCL1         | -0.1 | 8.4E-01 | 1.0E+00 |
| SHP1       | 0.2  | 7.3E-01 | 1.0E+00 | CAT          | -0.1 | 8.4E-01 | 1.0E+00 |
| BATF       | 0.2  | 7.4E-01 | 1.0E+00 | HPRT1        | 0.1  | 8.4E-01 | 1.0E+00 |
| MAD        | -0.1 | 7.4E-01 | 1.0E+00 | IKZF1        | 0.1  | 8.4E-01 | 1.0E+00 |
| SOCS3      | -0.2 | 7.4E-01 | 1.0E+00 | JAK2         | -0.1 | 8.4E-01 | 1.0E+00 |
| NKG2F      | -0.3 | 7.4E-01 | 1.0E+00 | NEIL2        | -0.2 | 8.4E-01 | 1.0E+00 |
| IRF4       | -0.2 | 7.4E-01 | 1.0E+00 | NFkB         | -0.1 | 8.5E-01 | 1.0E+00 |

|         |      |         |         |            |      |         |         |
|---------|------|---------|---------|------------|------|---------|---------|
| CXCR4   | 0.1  | 8.5E-01 | 1.0E+00 | PRDM1      | 0.0  | 9.4E-01 | 1.0E+00 |
| KLF10   | 0.2  | 8.5E-01 | 1.0E+00 | ITCH       | 0.0  | 9.4E-01 | 1.0E+00 |
| DUSP16  | -0.1 | 8.5E-01 | 1.0E+00 | CLA        | 0.0  | 9.4E-01 | 1.0E+00 |
| MAP2K1  | -0.1 | 8.6E-01 | 1.0E+00 | LGALS3     | 0.1  | 9.4E-01 | 1.0E+00 |
| IL21R   | 0.1  | 8.6E-01 | 1.0E+00 | CATHEPSIND | 0.0  | 9.4E-01 | 1.0E+00 |
| RAF1    | 0.1  | 8.6E-01 | 1.0E+00 | IL18RAP    | 0.0  | 9.4E-01 | 1.0E+00 |
| FOXO1   | 0.1  | 8.6E-01 | 1.0E+00 | IL4R       | 0.0  | 9.5E-01 | 1.0E+00 |
| MIF     | -0.1 | 8.6E-01 | 1.0E+00 | TNFSF10    | 0.0  | 9.5E-01 | 1.0E+00 |
| FADD    | 0.1  | 8.6E-01 | 1.0E+00 | CD58       | 0.0  | 9.5E-01 | 1.0E+00 |
| GADD45B | 0.2  | 8.6E-01 | 1.0E+00 | BID        | 0.1  | 9.5E-01 | 1.0E+00 |
| FOXP1   | 0.1  | 8.7E-01 | 1.0E+00 | JAK1       | 0.0  | 9.5E-01 | 1.0E+00 |
| HLAG    | -0.1 | 8.7E-01 | 1.0E+00 | CD247      | 0.0  | 9.5E-01 | 1.0E+00 |
| NR3C1   | -0.1 | 8.7E-01 | 1.0E+00 | SOD1       | 0.0  | 9.6E-01 | 1.0E+00 |
| PRKCQ   | 0.1  | 8.8E-01 | 1.0E+00 | CIITA      | 0.1  | 9.6E-01 | 1.0E+00 |
| TCF12   | 0.1  | 8.8E-01 | 1.0E+00 | CRIP1      | 0.1  | 9.6E-01 | 1.0E+00 |
| NR4A1   | -0.1 | 8.8E-01 | 1.0E+00 | ARRB2      | 0.1  | 9.6E-01 | 1.0E+00 |
| BCL10   | -0.1 | 8.8E-01 | 1.0E+00 | NEIL1      | -0.1 | 9.6E-01 | 1.0E+00 |
| ITGB7   | 0.0  | 8.8E-01 | 1.0E+00 | SMAD4      | 0.0  | 9.6E-01 | 1.0E+00 |
| MAPK14  | 0.1  | 8.8E-01 | 1.0E+00 | SELL       | 0.0  | 9.6E-01 | 1.0E+00 |
| HDAC2   | 0.1  | 8.8E-01 | 1.0E+00 | C11ORF17   | 0.0  | 9.6E-01 | 1.0E+00 |
| CD244   | 0.0  | 8.9E-01 | 1.0E+00 | TNFSF14    | 0.0  | 9.6E-01 | 1.0E+00 |
| IL18R1  | 0.1  | 8.9E-01 | 1.0E+00 | RHOA       | 0.0  | 9.6E-01 | 1.0E+00 |
| S100A4  | 0.1  | 8.9E-01 | 1.0E+00 | CCR5       | -0.1 | 9.6E-01 | 1.0E+00 |
| HOXB4   | -0.1 | 8.9E-01 | 1.0E+00 | NKG2C      | -0.1 | 9.7E-01 | 1.0E+00 |
| CSNK2A1 | 0.1  | 8.9E-01 | 1.0E+00 | S100A6     | 0.0  | 9.7E-01 | 1.0E+00 |
| BCL11B  | 0.0  | 9.0E-01 | 1.0E+00 | SIT1       | 0.0  | 9.7E-01 | 1.0E+00 |
| CTNBL1  | 0.1  | 9.0E-01 | 1.0E+00 | KIR2DL4    | -0.1 | 9.7E-01 | 1.0E+00 |
| NCL     | 0.1  | 9.0E-01 | 1.0E+00 | CD3E       | 0.0  | 9.7E-01 | 1.0E+00 |
| ELF1    | 0.1  | 9.0E-01 | 1.0E+00 | GZMA       | 0.0  | 9.7E-01 | 1.0E+00 |
| MBD2    | 0.1  | 9.0E-01 | 1.0E+00 | TBX21      | 0.0  | 9.7E-01 | 1.0E+00 |
| DAP10   | -0.1 | 9.0E-01 | 1.0E+00 | GLO1       | 0.1  | 9.7E-01 | 1.0E+00 |
| ELF4    | 0.1  | 9.0E-01 | 1.0E+00 | IFNG       | -0.1 | 9.7E-01 | 1.0E+00 |
| GSK3B   | -0.1 | 9.1E-01 | 1.0E+00 | IL12RB1    | 0.0  | 9.7E-01 | 1.0E+00 |
| IRF1    | 0.0  | 9.1E-01 | 1.0E+00 | CCNB1      | -0.1 | 9.7E-01 | 1.0E+00 |
| CDKN1A  | -0.1 | 9.1E-01 | 1.0E+00 | IRF2       | 0.0  | 9.7E-01 | 1.0E+00 |
| CREB1   | 0.0  | 9.1E-01 | 1.0E+00 | PDE7       | 0.0  | 9.7E-01 | 1.0E+00 |
| TDO2    | 0.1  | 9.1E-01 | 1.0E+00 | TNFRSF7    | 0.0  | 9.8E-01 | 1.0E+00 |
| STAT3   | -0.1 | 9.1E-01 | 1.0E+00 | CLIC1      | 0.0  | 9.8E-01 | 1.0E+00 |
| AHNAK   | 0.1  | 9.1E-01 | 1.0E+00 | JAK3       | 0.0  | 9.8E-01 | 1.0E+00 |
| CD63    | 0.0  | 9.1E-01 | 1.0E+00 | OPTN       | 0.0  | 9.8E-01 | 1.0E+00 |
| LCK     | 0.0  | 9.1E-01 | 1.0E+00 | MAPK3      | 0.0  | 9.8E-01 | 1.0E+00 |
| KLF6    | 0.1  | 9.2E-01 | 1.0E+00 | RORA       | 0.1  | 9.8E-01 | 1.0E+00 |
| IL2RB   | 0.0  | 9.2E-01 | 1.0E+00 | KLF7       | 0.0  | 9.9E-01 | 1.0E+00 |
| NKp46   | 0.0  | 9.2E-01 | 1.0E+00 | CDKN1B     | 0.0  | 9.9E-01 | 1.0E+00 |
| EIF1    | 0.1  | 9.2E-01 | 1.0E+00 | PPP2R1A    | 0.0  | 9.9E-01 | 1.0E+00 |
| TRAF2   | 0.1  | 9.2E-01 | 1.0E+00 | ATP2B4     | 0.0  | 9.9E-01 | 1.0E+00 |
| DOK2    | 0.1  | 9.2E-01 | 1.0E+00 | CD2        | 0.0  | 9.9E-01 | 1.0E+00 |
| ADAM19  | -0.1 | 9.2E-01 | 1.0E+00 | CXCR3      | 0.0  | 9.9E-01 | 1.0E+00 |
| GFI1    | 0.0  | 9.2E-01 | 1.0E+00 | C10RF24    | 0.0  | 9.9E-01 | 1.0E+00 |
| NKG2E   | -0.1 | 9.3E-01 | 1.0E+00 | TGFB1      | 0.0  | 9.9E-01 | 1.0E+00 |
| AIF1    | 0.0  | 9.3E-01 | 1.0E+00 | STAT4      | 0.0  | 1.0E+00 | 1.0E+00 |
| HMGB2   | 0.0  | 9.3E-01 | 1.0E+00 | ZAP70      | 0.0  | 1.0E+00 | 1.0E+00 |
| HDAC1   | 0.1  | 9.3E-01 | 1.0E+00 | CD3D       | 0.0  | 1.0E+00 | 1.0E+00 |
| CTNBL1  | 0.0  | 9.3E-01 | 1.0E+00 | GABPa      | 0.0  | 1.0E+00 | 1.0E+00 |
| TYK2    | 0.1  | 9.3E-01 | 1.0E+00 | CCR10      | -0.1 | 1.0E+00 | 1.0E+00 |
| IAP     | 0.1  | 9.3E-01 | 1.0E+00 | PECAM1     | -0.1 | 1.0E+00 | 1.0E+00 |
| C80RF70 | 0.2  | 9.3E-01 | 1.0E+00 | SOX4       | 0.1  | 1.0E+00 | 1.0E+00 |
| PPARA   | 0.0  | 9.3E-01 | 1.0E+00 |            |      |         |         |
